# Supplementary material
Source: Research Square preprint supplement (doi:10.21203/rs.3.rs-8037905/v2)
Supplement: Supplementary file 1 [file 4e8d3604b5085e53b6cc3f70.xlsx]

## Sheet: TableS7
Strain number	Phenotype of the original colony picked from TBX-CTX agar	Acc number of partial 16S rRNA gene sequences	Partial 16S rRNA gene sequence identities to closest related type strains based BLAST analysis in GenBank (if type strain names of next related species given in brackets the assignment is based on identical BOX-PCR patterns)			#Sample type	#Soil type	#Treatment type	#Spiking	blaCTX-M	blaTEM	blaSHV	Box assignment (Ref= strains selected for phylogenetic identification by partial 16S rRNA gene sequencing; strains in brackets were those Ref strains that were used for phylogenetic asignment)	BOX-PCR based genotype	Phylotype (16S rRNA gene sequence based)
			Sequence identity (in %)	Type strains of next related species (*: same sequence identities to type strains of other species of the Citrobacter freundii complex)	Acc. Numbers
750-CE-TC-PE-SSL-1	Blue			(Citrobacter freundii NBRC 12681T)*		Stained_Soil_(SS)	Leptosol (L)	Untreated	Spiked	1	1	0	(779-CE-TC-PE-SSL-1)	Bx-C4	Ci-1a
750-CE-TC-PE-SSL-2	Blue			(Citrobacter freundii NBRC 12681T)*		Stained_Soil_(SS)	Leptosol (L)	Untreated	Spiked	1	1	0	(779-CE-TC-PE-SSL-1)	Bx-C4	Ci-1a
750-CE-TC-PE-SSL-3A	Blue			(Citrobacter freundii NBRC 12681T)*		Stained_Soil_(SS)	Leptosol (L)	Untreated	Spiked	1	1	0	(779-CE-TC-PE-SSL-1)	Bx-C4	Ci-1a
750-CE-TC-PE-SSL-3B	Blue			(Citrobacter freundii NBRC 12681T)*		Stained_Soil_(SS)	Leptosol (L)	Untreated	Spiked	1	1	0	(779-CE-TC-PE-SSL-1)	Bx-C4	Ci-1a
750-CE-TC-PE-SSL-4A	Blue			(Citrobacter freundii NBRC 12681T)*		Stained_Soil_(SS)	Leptosol (L)	Untreated	Spiked	1	1	0	(779-CE-TC-PE-SSL-1)	Bx-C4	Ci-1a
750-CE-TC-PE-SSL-4B	Blue			(Citrobacter freundii NBRC 12681T)*		Stained_Soil_(SS)	Leptosol (L)	Untreated	Spiked	1	1	0	(779-CE-TC-PE-SSL-1)	Bx-C4	Ci-1a
750-CE-TC-PE-SSL-5	Blue			(Citrobacter freundii NBRC 12681T)*		Stained_Soil_(SS)	Leptosol (L)	Untreated	Spiked	1	1	0	(779-CE-TC-PE-SSL-1)	Bx-C4	Ci-1a
776-CE-TC-PE-SSL-1	Cream white			(Raoultella ornithinolytica ATCC 31898T/Raoultella planticola ATCC 33531T)		Stained_Soil_(SS)	Leptosol (L)	Untreated	Spiked	1	1	0	(770-CE-TC-PE-SSL-1)	Bx-R-1	Ra-1
770-CE-TC-PE-SSL-1	Cream white	PV492334.1	99.9/99.7	Raoultella ornithinolytica ATCC 31898T/Raoultella planticola ATCC 33531T	NR_114502.1/NR_024996.1	Stained_Soil_(SS)	Leptosol (L)	Untreated	Spiked	1	1	0	Ref= 770-CE-TC-PE-SSL-1	Bx-R-1	Ra-1
753-CE-TC-PE-SSL-1	Blue			(Citrobacter freundii NBRC 12681T)*		Stained_Soil_(SS)	Leptosol (L)	Treated	Unspiked	1	1	0	(779-CE-TC-PE-SSL-2)	Bx-C2	Ci-1a
753-CE-TC-PE-SSL-2	Blue			(Citrobacter freundii NBRC 12681T)*		Stained_Soil_(SS)	Leptosol (L)	Treated	Unspiked	1	1	0	(779-CE-TC-PE-SSL-2)	Bx-C2	Ci-1a
753-CE-TC-PE-SSL-3A	Blue			(Citrobacter freundii NBRC 12681T)*		Stained_Soil_(SS)	Leptosol (L)	Treated	Unspiked	1	1	0	(779-CE-TC-PE-SSL-2)	Bx-C2	Ci-1a
753-CE-TC-PE-SSL-3B	Blue			(Citrobacter freundii NBRC 12681T)*		Stained_Soil_(SS)	Leptosol (L)	Treated	Unspiked	1	1	0	(779-CE-TC-PE-SSL-2)	Bx-C2	Ci-1a
753-CE-TC-PE-SSL-3C	Blue			(Citrobacter freundii NBRC 12681T)*		Stained_Soil_(SS)	Leptosol (L)	Treated	Unspiked	1	1	0	(779-CE-TC-PE-SSL-2)	Bx-C2	Ci-1a
753-CE-TC-PE-SSL-4A	Blue			(Citrobacter freundii NBRC 12681T)*		Stained_Soil_(SS)	Leptosol (L)	Treated	Unspiked	1	1	0	(779-CE-TC-PE-SSL-2)	Bx-C2	Ci-1a
753-CE-TC-PE-SSL-4B	Blue			(Citrobacter freundii NBRC 12681T)*		Stained_Soil_(SS)	Leptosol (L)	Treated	Unspiked	1	1	0	(779-CE-TC-PE-SSL-2)	Bx-C2	Ci-1a
753-CE-TC-PE-SSL-5A	Blue			(Citrobacter freundii NBRC 12681T)*		Stained_Soil_(SS)	Leptosol (L)	Treated	Unspiked	1	1	0	(779-CE-TC-PE-SSL-2)	Bx-C2	Ci-1a
753-CE-TC-PE-SSL-5B	Blue			(Citrobacter freundii NBRC 12681T)*		Stained_Soil_(SS)	Leptosol (L)	Treated	Unspiked	1	1	0	(779-CE-TC-PE-SSL-2)	Bx-C2	Ci-1a
753-CE-TC-PE-SSL-5C	Blue			(Citrobacter freundii NBRC 12681T)*		Stained_Soil_(SS)	Leptosol (L)	Treated	Unspiked	1	1	0	(779-CE-TC-PE-SSL-2)	Bx-C2	Ci-1a
761-CE-TC-PE-SSL-1	Blue			(Citrobacter freundii NBRC 12681T)*		Stained_Soil_(SS)	Leptosol (L)	Treated	Unspiked	1	1	0	(779-CE-TC-PE-SSL-2)	Bx-C2	Ci-1a
761-CE-TC-PE-SSL-2A	Blue			(Citrobacter freundii NBRC 12681T)*		Stained_Soil_(SS)	Leptosol (L)	Treated	Unspiked	1	1	0	(773-CE-TC-PE-SSL-4A)	Bx-C2	Ci-1a
761-CE-TC-PE-SSL-2B	Blue			(Citrobacter freundii NBRC 12681T)*		Stained_Soil_(SS)	Leptosol (L)	Treated	Unspiked	1	1	0	(773-CE-TC-PE-SSL-4A)	Bx-C2	Ci-1a
761-CE-TC-PE-SSL-3A	Blue			(Citrobacter freundii NBRC 12681T)*		Stained_Soil_(SS)	Leptosol (L)	Treated	Unspiked	1	1	0	(773-CE-TC-PE-SSL-4A)	Bx-C2	Ci-1a
761-CE-TC-PE-SSL-3B	Blue			(Citrobacter freundii NBRC 12681T)*		Stained_Soil_(SS)	Leptosol (L)	Treated	Unspiked	1	1	0	(773-CE-TC-PE-SSL-4A)	Bx-C2	Ci-1a
761-CE-TC-PE-SSL-4A	Blue			(Citrobacter freundii NBRC 12681T)*		Stained_Soil_(SS)	Leptosol (L)	Treated	Unspiked	1	1	0	(773-CE-TC-PE-SSL-4A)	Bx-C2	Ci-1a
761-CE-TC-PE-SSL-4B	Blue			(Citrobacter freundii NBRC 12681T)*		Stained_Soil_(SS)	Leptosol (L)	Treated	Unspiked	1	1	0	(773-CE-TC-PE-SSL-4A)	Bx-C2	Ci-1a
773-CE-TC-PE-SSL-1	Blue			(Citrobacter freundii NBRC 12681T)*		Stained_Soil_(SS)	Leptosol (L)	Treated	Unspiked	1	1	0	(779-CE-TC-PE-SSL-2)	Bx-C2	Ci-1a
773-CE-TC-PE-SSL-2A	Blue			(Citrobacter freundii NBRC 12681T)*		Stained_Soil_(SS)	Leptosol (L)	Treated	Unspiked	1	1	0	(773-CE-TC-PE-SSL-4A)	Bx-C2	Ci-1a
773-CE-TC-PE-SSL-2B	Blue			(Citrobacter freundii NBRC 12681T)*		Stained_Soil_(SS)	Leptosol (L)	Treated	Unspiked	1	1	0	(773-CE-TC-PE-SSL-4A)	Bx-C2	Ci-1a
773-CE-TC-PE-SSL-3A	Blue			(Citrobacter freundii NBRC 12681T)*		Stained_Soil_(SS)	Leptosol (L)	Treated	Unspiked	1	1	0	(773-CE-TC-PE-SSL-4A)	Bx-C2	Ci-1a
773-CE-TC-PE-SSL-3B	Blue			(Citrobacter freundii NBRC 12681T)*		Stained_Soil_(SS)	Leptosol (L)	Treated	Unspiked	1	1	0	(773-CE-TC-PE-SSL-4A)	Bx-C2	Ci-1a
773-CE-TC-PE-SSL-4A	Blue	PV492379.1	99.7	Citrobacter freundii NBRC 12681T*	NR_113596.1	Stained_Soil_(SS)	Leptosol (L)	Treated	Unspiked	1	1	0	Ref= 773-CE-TC-PE-SSL-4A	Bx-C2	Ci-1a
773-CE-TC-PE-SSL-4B	Blue			(Citrobacter freundii NBRC 12681T)*		Stained_Soil_(SS)	Leptosol (L)	Treated	Unspiked	1	1	0	(773-CE-TC-PE-SSL-4A)	Bx-C2	Ci-1a
773-CE-TC-PE-SSL-4C	Blue			(Citrobacter freundii NBRC 12681T)*		Stained_Soil_(SS)	Leptosol (L)	Treated	Unspiked	1	1	0	(773-CE-TC-PE-SSL-4A)	Bx-C2	Ci-1a
779-CE-TC-PE-SSL-1	Blue	PV492336.1	99.3	Citrobacter freundii NBRC 12681T*	NR_113596.1	Stained_Soil_(SS)	Leptosol (L)	Treated	Unspiked	1	1	0	Ref= 779-CE-TC-PE-SSL-1	Bx-C4	Ci-1a
779-CE-TC-PE-SSL-2	Blue	PV492351.1	99.8	Citrobacter freundii NBRC 12681T*	NR_113596.1	Stained_Soil_(SS)	Leptosol (L)	Treated	Unspiked	1	1	0	Ref= 779-CE-TC-PE-SSL-2	Bx-C2	Ci-1a
779-CE-TC-PE-SSL-3A	Blue			(Citrobacter freundii NBRC 12681T)*		Stained_Soil_(SS)	Leptosol (L)	Treated	Unspiked	1	1	0	(773-CE-TC-PE-SSL-4A)	Bx-C2	Ci-1a
779-CE-TC-PE-SSL-3B	Blue			(Citrobacter freundii NBRC 12681T)*		Stained_Soil_(SS)	Leptosol (L)	Treated	Unspiked	1	1	0	(773-CE-TC-PE-SSL-4A)	Bx-C2	Ci-1a
779-CE-TC-PE-SSL-3C	Blue			(Citrobacter freundii NBRC 12681T)*		Stained_Soil_(SS)	Leptosol (L)	Treated	Unspiked	1	1	0	(773-CE-TC-PE-SSL-4A)	Bx-C2	Ci-1a
779-CE-TC-PE-SSL-4A	Blue			(Citrobacter freundii NBRC 12681T)*		Stained_Soil_(SS)	Leptosol (L)	Treated	Unspiked	1	1	0	(773-CE-TC-PE-SSL-4A)	Bx-C2	Ci-1a
779-CE-TC-PE-SSL-4B	Blue			(Citrobacter freundii NBRC 12681T)*		Stained_Soil_(SS)	Leptosol (L)	Treated	Unspiked	1	1	0	(773-CE-TC-PE-SSL-4A)	Bx-C2	Ci-1a
756-CE-TC-PE-SSL-1	Blue	PV492349.1	99.7	Citrobacter freundii NBRC 12681T*	NR_113596.1	Stained_Soil_(SS)	Leptosol (L)	Treated	Spiked	1	1	0	Ref= 756-CE-TC-PE-SSL-1	Bx-C2	Ci-1a
756-CE-TC-PE-SSL-3A	Blue			(Citrobacter freundii NBRC 12681T)*		Stained_Soil_(SS)	Leptosol (L)	Treated	Spiked	1	1	0	(756-CE-TC-PE-SSL-1)	Bx-C2	Ci-1a
756-CE-TC-PE-SSL-3B	Blue			(Citrobacter freundii NBRC 12681T)*		Stained_Soil_(SS)	Leptosol (L)	Treated	Spiked	1	1	0	(756-CE-TC-PE-SSL-1)	Bx-C2	Ci-1a
756-CE-TC-PE-SSL-4A	Blue			(Citrobacter freundii NBRC 12681T)*		Stained_Soil_(SS)	Leptosol (L)	Treated	Spiked	1	1	0	(773-CE-TC-PE-SSL-4A)	Bx-C2	Ci-1a
756-CE-TC-PE-SSL-4B	Blue			(Citrobacter freundii NBRC 12681T)*		Stained_Soil_(SS)	Leptosol (L)	Treated	Spiked	1	1	0	(773-CE-TC-PE-SSL-4A)	Bx-C2	Ci-1a
756-CE-TC-PE-SSL-5	Blue			(Citrobacter freundii NBRC 12681T)*		Stained_Soil_(SS)	Leptosol (L)	Treated	Spiked	1	1	0	(773-CE-TC-PE-SSL-4A)	Bx-C2	Ci-1a
764-CE-TC-PE-SSL-1	Blue			(Citrobacter freundii NBRC 12681T)*		Stained_Soil_(SS)	Leptosol (L)	Treated	Spiked	1	1	0	(756-CE-TC-PE-SSL-1)	Bx-C2	Ci-1a
764-CE-TC-PE-SSL-2	Blue			(Citrobacter freundii NBRC 12681T)*		Stained_Soil_(SS)	Leptosol (L)	Treated	Spiked	1	1	0	(756-CE-TC-PE-SSL-1)	Bx-C2	Ci-1a
764-CE-TC-PE-SSL-3A	Blue			(Citrobacter freundii NBRC 12681T)*		Stained_Soil_(SS)	Leptosol (L)	Treated	Spiked	1	1	0	(764-CE-TC-PE-SSL-4A)	Bx-C2	Ci-1a
764-CE-TC-PE-SSL-3B	Blue			(Citrobacter freundii NBRC 12681T)*		Stained_Soil_(SS)	Leptosol (L)	Treated	Spiked	1	1	0	(764-CE-TC-PE-SSL-4A)	Bx-C2	Ci-1a
764-CE-TC-PE-SSL-4A	Blue	PV492378.1	99	Citrobacter freundii NBRC 12681T*	NR_113596.1	Stained_Soil_(SS)	Leptosol (L)	Treated	Spiked	1	1	0	Ref_764-CE-TC-PE-SSL-4A	Bx-C2	Ci-1a
764-CE-TC-PE-SSL-4B	Blue			(Citrobacter freundii NBRC 12681T)*		Stained_Soil_(SS)	Leptosol (L)	Treated	Spiked	1	1	0	(764-CE-TC-PE-SSL-4A)	Bx-C2	Ci-1a
785-CE-TC-PE-SSL-1	Blue			(Klebsiella pneumoniae DSM 30104T)		Stained_Soil_(SS)	Leptosol (L)	Treated	Spiked	1	1	1	(785-CE-TC-PE-SSL-4)	Bx-K-1	Kl-1
785-CE-TC-PE-SSL-2A	Blue			(Citrobacter freundii NBRC 12681T)*		Stained_Soil_(SS)	Leptosol (L)	Treated	Spiked	1	1	0	(764-CE-TC-PE-SSL-4A)	Bx-C2	Ci-1a
785-CE-TC-PE-SSL-2B	Blue			(Citrobacter freundii NBRC 12681T)*		Stained_Soil_(SS)	Leptosol (L)	Treated	Spiked	1	1	0	(764-CE-TC-PE-SSL-4A)	Bx-C2	Ci-1a
785-CE-TC-PE-SSL-4	Cream white	PV492353.1	99.9	Klebsiella pneumoniae DSM 30104T	NR_117683.1	Stained_Soil_(SS)	Leptosol (L)	Treated	Spiked	1	1	0	Ref= 785-CE-TC-PE-SSL-4	Bx-K-1	Kl-1
785-CE-TC-PE-SSL-5	Cream white	PV492380.1	99.5	Enterobacter quasihormaechei WCHEs120003T/ Enterobacter hormaechei subsp. xiangfangensis 10-17T	NR_180451.1/NR_126208.1	Stained_Soil_(SS)	Leptosol (L)	Treated	Spiked	1	1	0	Ref= 785-CETCPE-SSL-5	Bx-ET-1	En-1
789-CE-TC-PE-SSL-1	Blue			(Citrobacter freundii NBRC 12681T)*		Stained_Soil_(SS)	Leptosol (L)	Treated	Spiked	1	1	0	(756-CE-TC-PE-SSL-1)	Bx-C2	Ci-1a
789-CE-TC-PE-SSL-2	Blue			(Klebsiella pneumoniae DSM 30104T)		Stained_Soil_(SS)	Leptosol (L)	Treated	Spiked	1	1	1	(785-CE-TC-PE-SSL-4)	Bx-K-1	Kl-1
789-CE-TC-PE-SSL-3A	Blue			(Citrobacter freundii NBRC 12681T)*		Stained_Soil_(SS)	Leptosol (L)	Treated	Spiked	1	1	0	(789-CE-TC-PE-SSL-4B)	Bx-C2	Ci-1a
789-CE-TC-PE-SSL-3B	Blue			(Citrobacter freundii NBRC 12681T)*		Stained_Soil_(SS)	Leptosol (L)	Treated	Spiked	1	1	0	(789-CE-TC-PE-SSL-4B)	Bx-C2	Ci-1a
789-CE-TC-PE-SSL-4A	Blue			(Citrobacter freundii NBRC 12681T)*		Stained_Soil_(SS)	Leptosol (L)	Treated	Spiked	1	1	0	(789-CE-TC-PE-SSL-4B)	Bx-C2	Ci-1a
789-CE-TC-PE-SSL-4B	Blue	PV492354.1	99.9	Citrobacter freundii NBRC 12681T*	NR_113596.1	Stained_Soil_(SS)	Leptosol (L)	Treated	Spiked	1	1	0	Ref= 789-CE-TC-PE-SSL-4B	Bx-C2	Ci-1a
843-CE-TC-PE-RSL-1	Blue			(Pseudomonas arenae VK110/Pseudomonas rhodesia CIP 104664)		Rhizosphere_(RS)	Leptosol (L)	Untreated	Unspiked	0	0	0	(855-CE-TC-PE-RSL-1)	Bx-PS-4	Ps-2
843-CE-TC-PE-RSL-1R	Cream white	PV492384.1	99.9	Pseudomonas qingdaonensis JJ3T/ Pseudomonas palmensis BBB001T	NR_169411.1/ NR_181427.1	Rhizosphere_(RS)	Leptosol (L)	Untreated	Unspiked	0	0	0	Ref= 843-CETCPE-RSL-1R	Bx-PS-5	Ps-3
855-CE-TC-PE-RSL-1	Blue	PV492340.1	99.4/99.6	Pseudomonas arenae VK110/Pseudomonas rhodesia CIP 104664	NR_181728.1/NR_024911.1	Rhizosphere_(RS)	Leptosol (L)	Untreated	Unspiked	0	0	0	Ref= 855-CE-TC-PE-RSL-1	Bx-PS-4	Ps-2
855-CE-TC-PE-RSL-1R	Cream white	PV492390.1	99.7	Pseudomonas qingdaonensis JJ3T/Pseudomonas palmensis BBB001T	NR_169411.1/NR_181427.1	Rhizosphere_(RS)	Leptosol (L)	Untreated	Unspiked	0	0	0	Ref= 855-CETCPE-RSL-1R	Bx-PS-6	Ps-3
846-CE-TC-PE-RSL-1	Cream white			(Enterobacter quasihormaechei WCHEs120003T/ Enterobacter hormaechei subsp. xiangfangensis 10-17T)		Rhizosphere_(RS)	Leptosol (L)	Untreated	Spiked	1	1	0	(873-CE-TC-PE-RSV-1)	Bx-ET-1	En-1
846-CE-TC-PE-RSL-2R	Cream white			(Enterobacter quasihormaechei WCHEs120003T/ Enterobacter hormaechei subsp. xiangfangensis 10-17T)		Rhizosphere_(RS)	Leptosol (L)	Untreated	Spiked	1	1	0	(873-CE-TC-PE-RSV-1)	Bx-ET-1	En-1
866-CE-TC-PE-RSL-1	Cream white			(Enterobacter quasihormaechei WCHEs120003T/ Enterobacter hormaechei subsp. xiangfangensis 10-17T)		Rhizosphere_(RS)	Leptosol (L)	Untreated	Spiked	1	1	0	(873-CE-TC-PE-RSV-1)	Bx-ET-1	En-1
866-CE-TC-PE-RSL-2R	Cream white			(Enterobacter quasihormaechei WCHEs120003T/ Enterobacter hormaechei subsp. xiangfangensis 10-17T)		Rhizosphere_(RS)	Leptosol (L)	Untreated	Spiked	1	1	0	(873-CE-TC-PE-RSV-1)	Bx-ET-1	En-1
872-CE-TC-PE-RSL-1	Cream white	PV492369.1	99.9/99.7	Raoultella ornithinolytica ATCC 31898T/Raoultella planticola ATCC 33531T	NR_114502.1/NR_024996.1	Rhizosphere_(RS)	Leptosol (L)	Untreated	Spiked	1	1	0	Ref= 872-CE-TC-PE-RSL-1	Bx-R-1	Ra-1
849-CE-TC-PE-RSL-1	Blue	PV492381.1	99.9	Citrobacter freundii NBRC 12681T*	NR_113596.1	Rhizosphere_(RS)	Leptosol (L)	Treated	Unspiked	1	1	0	Ref= 849-CE-TC-PE-RSL-1	Bx-C2	Ci-1a
849-CE-TC-PE-RSL-2	Blue			(Citrobacter arsenatis LY-1T)		Rhizosphere_(RS)	Leptosol (L)	Treated	Unspiked	1	1	0	(869-CE-TC-PE-RSL-1)	Bx-C3	Ci-1b
857-CE-TC-PE-RSL-1	Blue	PV492364.1	99.5	Citrobacter freundii NBRC 12681T*	NR_113596.1	Rhizosphere_(RS)	Leptosol (L)	Treated	Unspiked	1	1	0	Ref= 857-CE-TC-PE-RSL-1	Bx-C2	Ci-1a
857-CE-TC-PE-RSL-2	Blue			(Citrobacter arsenatis LY-1T)		Rhizosphere_(RS)	Leptosol (L)	Treated	Unspiked	1	1	0	(869-CE-TC-PE-RSL-1)	Bx-C3	Ci-1b
857-CE-TC-PE-RSL-3R	Cream white	PV492391.1	100	Pseudomonas qingdaonensis JJ3T/Pseudomonas palmensis BBB001T	NR_169411.1/NR_181427.1	Rhizosphere_(RS)	Leptosol (L)	Treated	Unspiked	0	0	0	Ref= 857-CETCPE-RSL-3R	Bx-PS-1	Ps-3
869-CE-TC-PE-RSL-1	Blue	PV492367.1	99.8	Citrobacter arsenatis LY-1T	NR_180353.1	Rhizosphere_(RS)	Leptosol (L)	Treated	Unspiked	1	1	0	Ref= 869-CE-TC-PE-RSL-1	Bx-C3	Ci-1b
869-CE-TC-PE-RSL-1R	Cream white	PV492399.1	100	Pseudomonas qingdaonensis JJ3T/Pseudomonas palmensis BBB001T	NR_169411.1/NR_181427.1	Rhizosphere_(RS)	Leptosol (L)	Treated	Unspiked	0	0	0	Ref= 869-CETCPE-RSL-1R	Bx-PS-1	Ps-3
875-CE-TC-PE-RSL-1	Cream white			(Citrobacter arsenatis LY-1T)		Rhizosphere_(RS)	Leptosol (L)	Treated	Unspiked	1	1	0	(869-CE-TC-PE-RSL-1)	Bx-C3	Ci-1b
852-CE-TC-PE-RSL-1	Blue			(Citrobacter freundii NBRC 12681T)*		Rhizosphere_(RS)	Leptosol (L)	Treated	Spiked	1	1	0	(849-CE-TC-PE-RSL-1)	Bx-C2	Ci-1a
852-CE-TC-PE-RSL-2	Blue			(Citrobacter freundii NBRC 12681T)*		Rhizosphere_(RS)	Leptosol (L)	Treated	Spiked	1	1	0	(849-CE-TC-PE-RSL-1)	Bx-C2	Ci-1a
860-CE-TC-PE-RSL-1	Blue			(Citrobacter freundii NBRC 12681T)*		Rhizosphere_(RS)	Leptosol (L)	Treated	Spiked	1	1	0	(849-CE-TC-PE-RSL-1)	Bx-C2	Ci-1a
860-CE-TC-PE-RSL-2	Blue			(Citrobacter freundii NBRC 12681T)*		Rhizosphere_(RS)	Leptosol (L)	Treated	Spiked	1	1	0	(849-CE-TC-PE-RSL-1)	Bx-C2	Ci-1a
881-CE-TC-PE-RSL-1	Blue			(Citrobacter freundii NBRC 12681T)*		Rhizosphere_(RS)	Leptosol (L)	Treated	Spiked	1	1	0	(849-CE-TC-PE-RSL-1)	Bx-C2	Ci-1a
881-CE-TC-PE-RSL-2	Blue			(Citrobacter freundii NBRC 12681T)*		Rhizosphere_(RS)	Leptosol (L)	Treated	Spiked	1	1	0	(849-CE-TC-PE-RSL-1)	Bx-C2	Ci-1a
885-CE-TC-PE-RSL-1	Blue			(Citrobacter freundii NBRC 12681T)*		Rhizosphere_(RS)	Leptosol (L)	Treated	Spiked	1	1	0	(849-CE-TC-PE-RSL-1)	Bx-C2	Ci-1a
885-CE-TC-PE-RSL-2	Blue			(Citrobacter freundii NBRC 12681T)*		Rhizosphere_(RS)	Leptosol (L)	Treated	Spiked	1	1	0	(849-CE-TC-PE-RSL-1)	Bx-C2	Ci-1a
771-CE-TC-PE-SSV-1	Blue	PV492335.1	99.6/99.7	Raoultella ornithinolytica ATCC 31898T/Raoultella planticola ATCC 33531T	NR_114502.1/NR_024996.1	Stained_Soil_(SS)	Vertisol (V)	Untreated	Spiked	1	1	0	Ref= 771-CE-TC-PE-SSV-1	Bx-R-1	Ra-1
777-CE-TC-PE-SSV-1	Blue			(Raoultella ornithinolytica ATCC 31898T/Raoultella planticola ATCC 33531T)		Stained_Soil_(SS)	Vertisol (V)	Untreated	Spiked	1	1	0	(771-CE-TC-PE-SSV-1)	Bx-R-1	Ra-1
783-CE-TC-PE-SSV-1	Blue	PV492352.1	99.8/99.6	Raoultella ornithinolytica ATCC 31898T/Raoultella planticola ATCC 33531T	NR_114502.1/NR_024996.1	Stained_Soil_(SS)	Vertisol (V)	Untreated	Spiked	1	1	0	Ref= 783-CE-TC-PE-SSV-1	Bx-R-1	Ra-1
757-CE-TC-PE-SSV-1	Blue	PV492350.1	99.9	Citrobacter freundii NBRC 12681T*	NR_113596.1	Stained_Soil_(SS)	Vertisol (V)	Treated	Spiked	1	1	0	Ref= 757-CE-TC-PE-SSV-1	Bx-C2	Ci-1a
765-CE-TC-PE-SSV-1	Blue			(Citrobacter freundii NBRC 12681T)*		Stained_Soil_(SS)	Vertisol (V)	Treated	Spiked	1	1	0	(757-CE-TC-PE-SSV-1)	Bx-C2	Ci-1a
786-CE-TC-PE-SSV-1	Blue			(Citrobacter freundii NBRC 12681T)*		Stained_Soil_(SS)	Vertisol (V)	Treated	Spiked	1	1	0	(757-CE-TC-PE-SSV-1)	Bx-C2	Ci-1a
786-CE-TC-PE-SSV-2	Blue			(Citrobacter freundii NBRC 12681T)*		Stained_Soil_(SS)	Vertisol (V)	Treated	Spiked	0	0	0	(789-CE-TC-PE-SSL-4B)	Bx-C2	Ci-1a
790-CE-TC-PE-SSV-1	Blue			(Citrobacter freundii NBRC 12681T)*		Stained_Soil_(SS)	Vertisol (V)	Treated	Spiked	1	1	0	(757-CE-TC-PE-SSV-1)	Bx-C2	Ci-1a
790-CE-TC-PE-SSV-2	Blue			(Citrobacter freundii NBRC 12681T)*		Stained_Soil_(SS)	Vertisol (V)	Treated	Spiked	1	1	0	(757-CE-TC-PE-SSV-1)	Bx-C2	Ci-1a
844-CE-TC-PE-RSV-1	Blue	PV492356.1	100	Pseudomonas aeruginosa DSM 50071T	NR_117678.1	Rhizosphere_(RS)	Vertisol (V)	Untreated	Unspiked	0	0	0	Ref= 844-CE-TC-PE-RSV-1	Bx-PS-7	Ps-6
870-CE-TC-PE-RSV-1	Blue	PV492343.1	99.7	Pseudomonas urethralis BML-PP042T	NR_181197.1	Rhizosphere_(RS)	Vertisol (V)	Untreated	Unspiked	1	1	0	Ref= 870-CE-TC-PE-RSV-1	Bx-PS-8	Ps-4
889-CE-TC-PE-RSV-1	Blue	PV492375.1	99.7	Pseudomonas arenae VK110/Pseudomonas rhodesia CIP 104664	NR_181728.1/NR_024911.1	Rhizosphere_(RS)	Vertisol (V)	Untreated	Unspiked	1	1	0	Ref= 889-CE-TC-PE-RSV-1	Bx-PS-9	Ps-2
867-CE-TC-PE-RSV-1	Blue	E.coli confirmed by gadAB and uidA PCR				Rhizosphere_(RS)	Vertisol (V)	Untreated	Spiked	1	0	1	Ref= 867-CE-TC-PE-RSV-1	Bx-ESC-1	Ecoli
867-CE-TC-PE-RSV-2	Blue	E.coli confirmed by gadAB and uidA PCR				Rhizosphere_(RS)	Vertisol (V)	Untreated	Spiked	1	1	0	Ref= 867-CE-TC-PE-RSV-2	Bx-ESC-2	Ecoli
873-CE-TC-PE-RSV-1	Cream white	PV492345.1	99.5	Enterobacter quasihormaechei WCHEs120003T/ Enterobacter hormaechei subsp. xiangfangensis 10-17T	NR_180451.1/NR_126208.1	Rhizosphere_(RS)	Vertisol (V)	Untreated	Spiked	0	0	0	Ref= 873-CE-TC-PE-RSV-1	Bx-ET-1	En-1
879-CE-TC-PE-RSV-1	Cream white			(Enterobacter quasihormaechei WCHEs120003T/ Enterobacter hormaechei subsp. xiangfangensis 10-17T)		Rhizosphere_(RS)	Vertisol (V)	Untreated	Spiked	1	1	0	(873-CE-TC-PE-RSV-1)	Bx-ET-1	En-1
850-CE-TC-PE-RSV-1	Blue	PV492338.1	99.6	Citrobacter freundii NBRC 12681T*	NR_113596.1	Rhizosphere_(RS)	Vertisol (V)	Treated	Unspiked	1	1	0	Ref= 850-CE-TC-PE-RSV-1	Bx-C2	Ci-1a
850-CE-TC-PE-RSV-2	Blue			(Citrobacter freundii NBRC 12681T)*		Rhizosphere_(RS)	Vertisol (V)	Treated	Unspiked	1	1	0	(850-CE-TC-PE-RSV-1)	Bx-C2	Ci-1a
858-CE-TC-PE-RSV-1	Blue			(Citrobacter freundii NBRC 12681T)*		Rhizosphere_(RS)	Vertisol (V)	Treated	Unspiked	1	1	0	(850-CE-TC-PE-RSV-1)	Bx-C2	Ci-1a
858-CE-TC-PE-RSV-2	Blue			(Citrobacter freundii NBRC 12681T)*		Rhizosphere_(RS)	Vertisol (V)	Treated	Unspiked	1	1	0	(779-CE-TC-PE-SSL-1)	Bx-C2	Ci-1a
876-CE-TC-PE-RSV-1	Cream white	PV492371.1	99.7	Citrobacter arsenatis LY-1T	NR_180353.1	Rhizosphere_(RS)	Vertisol (V)	Treated	Unspiked	1	1	0	Ref= 876-CE-TC-PE-RSV-1	Bx-C3	Ci-1b
876-CE-TC-PE-RSV-2R	Cream white	PV492394.1	100	Pseudomonas qingdaonensis JJ3T/Pseudomonas palmensis BBB001T	NR_169411.1/NR_181427.1	Rhizosphere_(RS)	Vertisol (V)	Treated	Unspiked	0	0	0	Ref= 876-CETCPE-RSV-2R	Bx-PS-2	Ps-3
883-CE-TC-PE-RSV-1	Cream white			(Citrobacter arsenatis LY-1T)		Rhizosphere_(RS)	Vertisol (V)	Treated	Unspiked	1	1	0	(876-CE-TC-PE-RSV-1)	Bx-C3	Ci-1b
883-CE-TC-PE-RSV-2R	Cream white	PV492397.1	100	Pseudomonas qingdaonensis JJ3T/Pseudomonas palmensis BBB001T	NR_169411.1/NR_181427.1	Rhizosphere_(RS)	Vertisol (V)	Treated	Unspiked	0	0	0	Ref= 883-CETCPE-RSV-2R	Bx-PS-3	Ps-3
853-CE-TC-PE-RSV-1	Blue			(Citrobacter freundii NBRC 12681T)*		Rhizosphere_(RS)	Vertisol (V)	Treated	Spiked	1	1	0	(850-CE-TC-PE-RSV-1)	Bx-C2	Ci-1a
853-CE-TC-PE-RSV-2	Blue			(Citrobacter freundii NBRC 12681T)*		Rhizosphere_(RS)	Vertisol (V)	Treated	Spiked	1	1	0	(850-CE-TC-PE-RSV-1)	Bx-C2	Ci-1a
861-CE-TC-PE-RSV-1	Blue			(Citrobacter freundii NBRC 12681T)*		Rhizosphere_(RS)	Vertisol (V)	Treated	Spiked	1	1	0	(850-CE-TC-PE-RSV-1)	Bx-C2	Ci-1a
882-CE-TC-PE-RSV-1	Blue			(Citrobacter freundii NBRC 12681T)*		Rhizosphere_(RS)	Vertisol (V)	Treated	Spiked	1	1	0	(850-CE-TC-PE-RSV-1)	Bx-C2	Ci-1a
882-CE-TC-PE-RSV-2	Blue			(Citrobacter freundii NBRC 12681T)*		Rhizosphere_(RS)	Vertisol (V)	Treated	Spiked	1	1	0	(850-CE-TC-PE-RSV-1)	Bx-C2	Ci-1a
886-CE-TC-PE-RSV-1	Blue	PV492374.1	99.1	Citrobacter freundii NBRC 12681T*	NR_113596.1	Rhizosphere_(RS)	Vertisol (V)	Treated	Spiked	1	1	0	Ref= 886-CE-TC-PE-RSV-1	Bx-C2	Ci-1a
