# Supplementary material
Source: Research Square preprint supplement (doi:10.21203/rs.3.rs-8037905/v2)
Supplement: Supplementary file 1 [file 7382c24d35ab3e41546e940a.docx]

**Tables**

Sara Gallego1, Leila Soufi2, Ioannis Kampouris1, Kathia Lüneberg3, Benjamin J. Heyde4,5, Doreen Babin1, Christina Siebe3, Jan Siemens4, Kornelia Smalla1 and Elisabeth Grohmann2

1Julius Kühn Institute (JKI), Federal Research Centre for Cultivated Plants, Institute for Epidemiology and Pathogen Diagnostics, Messeweg 11-12, 38104 Braunschweig, Germany

2Berlin University of Applied Sciences, Faculty of Life Sciences and Technology, Department of Microbiology, Berlin, Germany

3Instituto de Geología, Universidad Nacional Autónoma de México, Ciudad Universitaria, México

4Justus Liebig University Giessen, iFZ Research Center for BioSystems, Land Use and Nutrition, Institute of Soil Science and Soil Conservation, Giessen, Germany.

5Ruhr University Bochum, Institute of Geography, Unit Soil Sciences and Soil Resources, Bochum, Germany

*Corresponding authors: **Sara Gallego** ([**sara.gallego@julius-kuehn.de**](mailto:sara.gallego@julius-kuehn.de)) and **Elisabeth Grohmann (e-mail:** [**egrohmann@bht-berlin.de**](mailto:egrohmann@bht-berlin.de)**)**

**Table 1.** Physicochemical characteristics of untreated (UWW) and treated (TWW) wastewater used to irrigate the soil columns and concentrations of spiked antibiotics and disinfectants used in this study.

| Parameters | UWW | TWW | Spiked concentrations |
| --- | --- | --- | --- |
| pH | 7.90 | 7.88 |  |
| EC (µS/cm) | 1352.25 | 1439.75 |  |
| Turbidity (NTU) | 7.79 | 2.59 |  |
| COD [mg/L] | 83 | 46 |  |
| TOC [mg/L] | 20.1 | 11.1 |  |
| Ntot [mg N/L] | 19.5 | 23.03 |  |
| Nitrate [mg N/L] | 0.04 | 4.1 |  |
| Ammonium [mg N/L] | 16.9 | 18.8 |  |
| Norg [mg N/L] | 2.56 | 0.13 |  |
| Total phosphorus [mg P/L] | 14.43 | 2.73 |  |
| Anhydroerythromycin [ng/L]* | 19 | 118 |  |
| Azithromycin [ng/L] | 0.5 | 0.7 | 695,000 |
| Ciprofloxacin [ng/L] | 100.5 | 28.6 | 1695,000 |
| Clindamycin [ng/L] | 18 | 160 | 60,000 |
| Erythromycin [ng/L] | < LOD | < LOD | 185,000 |
| Sulfamethoxazole [ng/L] | 2966 | 502 | 1,995,000 |
| Trimethoprim [ng/L] | 305 | 752 | 650,000 |
| ATMACs [ng/L] | -** | - | 84,546 |
| BACs [ng/L] | - | - | 261,650 |
| DADMACs [ng/L] | - | - | 156,452 |

*Anhydroerythromycin = degradation product of erythromycin

**:- not measured

LOD: limit of detection

EC: electrical conductivity; COD: chemical oxygen demand; TOC: total organic carbon; Ntot: total dissolved nitrogen; Norg: dissolved organic nitrogen; ATMACs: alkyltrimethyl ammonium compounds; BACs: benzylalkyldimethyl ammonium compounds; DADMACs: dialkyldimethyl ammonium compounds.

**Table 2.** Physicochemical characteristics of the soils used in the soil column experiment.

| Parameters | Leptosol | Vertisol |
| --- | --- | --- |
| sand [%] | 62 | 13 |
| silt [%] | 25 | 34 |
| clay [%] | 13  (sandy loam) | 53  (clay) |
| Ctot [%] | 2.33 | 2.70 |
| Corg [%] | 2.16 | 2.61 |
| carbonate C [%] | 0.17 | 0.09 |
| Ntot [%] | 0.21 | 0.26 |
| Stot [%] | 0.072 | 0.067 |
| pH | 7.01 | 7.22 |
| EC (µS cm-1) | 317 | 357 |

Ctot: total carbon; Corg: organic carbon; carbonate C: inorganic carbon; Ntot: total nitrogen; Stot: total sulfur; EC: electrical conductivity determined in 1:10 (w: vol) water extract.
