# Supplementary material
Source: Research Square preprint supplement (doi:10.21203/rs.3.rs-8037905/v2)
Supplement: Supplementary file 4 [file 889f2f709658109088a12b9e.xlsx]

## Sheet: Table S2
ASV	mean	coeff	p	FC	Group	Treatment	type_of_sample	padj	tax.Phylum	tax.Class	tax.Order	tax.Family	tax.Genus
ASV37	363.638	-0.00992846	9.64934e-06	0.135922	water_type	water_type	Root	0.00374718	Proteobacteria	Gammaproteobacteria	Enterobacterales	Enterobacteriaceae	Lelliottia
ASV59	170.567	-0.0144293	0.00113011	0.0422934	water_type	water_type	Root	0.0460396	Proteobacteria	Gammaproteobacteria	Pseudomonadales	Pseudomonadaceae	Pseudomonas
ASV94	142.096	-0.0151994	0.000590397	0.18666	water_type	water_type	Root	0.0292878	Proteobacteria	Gammaproteobacteria	Pseudomonadales	Pseudomonadaceae	Pseudomonas
ASV106	140.801	-0.0192089	0.000399654	0.192378	water_type	water_type	Root	0.0292878	Proteobacteria	Gammaproteobacteria	Pseudomonadales	Pseudomonadaceae	Pseudomonas
ASV108	71.7763	-0.0748225	1.19974e-05	0.0288754	water_type	water_type	Root	0.00374718	Proteobacteria	Gammaproteobacteria	Enterobacterales	Enterobacteriaceae	Enterobacter
ASV124	128.228	-0.0148019	0.000478314	0.206737	water_type	water_type	Root	0.0292878	Proteobacteria	Gammaproteobacteria	Enterobacterales	Shewanellaceae	Shewanella
ASV225	72.8736	0.0225099	0.000274179	4.42437	water_type	water_type	Root	0.0233551	Bacteroidota	Bacteroidia	Flavobacteriales	Weeksellaceae	Chryseobacterium
ASV235	5.09741	-0.29639	0.000185879	0.176481	water_type	water_type	Root	0.0189642	Proteobacteria	Alphaproteobacteria	Caulobacterales	Caulobacteraceae	Brevundimonas
ASV291	14.6312	-0.237398	3.87881e-06	0.0767437	water_type	water_type	Root	0.00363445	Chloroflexi	Chloroflexia	Chloroflexales	Herpetosiphonaceae	Herpetosiphon
ASV292	3.41216	0.520994	0.000656397	6.61743	water_type	water_type	Root	0.0292878	Proteobacteria	Gammaproteobacteria	Enterobacterales	Enterobacteriaceae	Citrobacter
ASV483	23.9487	0.592708	0.000202393	48.8974	water_type	water_type	Root	0.0189642	Proteobacteria	Gammaproteobacteria	Burkholderiales	Alcaligenaceae	Achromobacter
ASV522	5.25122	-3.11813	6.02662e-05	0.0869381	water_type	water_type	Root	0.0112939	Proteobacteria	Alphaproteobacteria	Rhizobiales	Hyphomicrobiaceae	Hyphomicrobium
ASV655	21.8121	-0.173134	0.000181771	0.0647324	water_type	water_type	Root	0.0189642	Proteobacteria	Gammaproteobacteria	Enterobacterales	Enterobacteriaceae	NA
ASV857	18.107	7.0024	0.000628197	37.2141	water_type	water_type	Root	0.0292878	Proteobacteria	Gammaproteobacteria	Burkholderiales	Comamonadaceae	Acidovorax
ASV935	10.4206	-0.653656	0.000628197	0.0457851	water_type	water_type	Root	0.0292878	Proteobacteria	Gammaproteobacteria	Enterobacterales	Enterobacteriaceae	NA
ASV937	12.1933	-0.210803	0.000199587	0.0582429	water_type	water_type	Root	0.0189642	Proteobacteria	Gammaproteobacteria	Enterobacterales	Enterobacteriaceae	NA
ASV1020	13.7674	1.008	0.000628197	28.5347	water_type	water_type	Root	0.0292878	Proteobacteria	Gammaproteobacteria	Enterobacterales	Enterobacteriaceae	NA
ASV1217	5.25016	-1.32548	0.000628197	0.0869542	water_type	water_type	Root	0.0292878	Actinobacteriota	Actinobacteria	Pseudonocardiales	Pseudonocardiaceae	Pseudonocardia
ASV1504	7.59962	1.3859	0.000628197	16.1992	water_type	water_type	Root	0.0292878	Proteobacteria	Gammaproteobacteria	Enterobacterales	Yersiniaceae	NA
ASV1743	5.25209	-1.96173	0.000628197	0.0869249	water_type	water_type	Root	0.0292878	Proteobacteria	Gammaproteobacteria	Enterobacterales	Enterobacteriaceae	NA
ASV1908	4.27241	-1.8882	6.02662e-05	0.104769	water_type	water_type	Root	0.0112939	Proteobacteria	Alphaproteobacteria	Caulobacterales	Caulobacteraceae	Caulobacter
ASV2356	3.46853	-0.508465	0.00124139	0.215193	water_type	water_type	Root	0.048466	Proteobacteria	Gammaproteobacteria	Enterobacterales	Enterobacteriaceae	NA
ASV3304	1.38284	0.934245	0.00108518	2.98115	water_type	water_type	Root	0.0460396	Proteobacteria	Gammaproteobacteria	Xanthomonadales	Xanthomonadaceae	Thermomonas
ASV5137	0.947	2.67861	7.74584e-05	2.7366	water_type	water_type	Root	0.0120964	Proteobacteria	Alphaproteobacteria	Rhizobiales	Rhizobiaceae	Allorhizobium-Neorhizobium-Pararhizobium-Rhizobium
ASV140	1.91533	-11.3616	0.000124597	0.217806	water_type	water_type	stained_soil	0.0434844	Bacteroidota	Bacteroidia	Flavobacteriales	Weeksellaceae	Chryseobacterium
ASV242	13.4612	-0.358512	4.06089e-05	0.054301	water_type	water_type	stained_soil	0.0177156	Proteobacteria	Gammaproteobacteria	Xanthomonadales	Xanthomonadaceae	Pseudoxanthomonas
ASV291	47.7312	-2.98842	3.69721e-05	0.0110502	water_type	water_type	stained_soil	0.0177156	Chloroflexi	Chloroflexia	Chloroflexales	Herpetosiphonaceae	Herpetosiphon
ASV522	26.7455	-2.4982	3.69721e-05	0.0195512	water_type	water_type	stained_soil	0.0177156	Proteobacteria	Alphaproteobacteria	Rhizobiales	Hyphomicrobiaceae	Hyphomicrobium
ASV1096	16.4243	1.11376	3.65208e-06	36.1949	water_type	water_type	stained_soil	0.00637288	Proteobacteria	Gammaproteobacteria	Burkholderiales	Methylophilaceae	Methylotenera
ASV1	14.5999	-0.403734	1.29688e-05	0.0500834	spike_level	spike_level	Root	0.00243035	Firmicutes	Bacilli	Exiguobacterales	Exiguobacteraceae	Exiguobacterium
ASV9	505.175	-0.0034006	0.000780677	0.23078	spike_level	spike_level	Root	0.0323148	Proteobacteria	Gammaproteobacteria	Enterobacterales	Erwiniaceae	Pantoea
ASV13	552.203	-0.00478382	0.000124581	0.246335	spike_level	spike_level	Root	0.0116733	Proteobacteria	Gammaproteobacteria	Pseudomonadales	Pseudomonadaceae	Pseudomonas
ASV22	298.878	0.010877	1.14189e-05	8.78538	spike_level	spike_level	Root	0.00243035	Proteobacteria	Gammaproteobacteria	Enterobacterales	Enterobacteriaceae	Citrobacter
ASV59	170.567	0.0674614	5.11563e-05	44.2329	spike_level	spike_level	Root	0.00532594	Proteobacteria	Gammaproteobacteria	Pseudomonadales	Pseudomonadaceae	Pseudomonas
ASV104	10.7565	-0.223364	0.0017039	0.0634494	spike_level	spike_level	Root	0.0498923	Proteobacteria	Gammaproteobacteria	Enterobacterales	Erwiniaceae	NA
ASV112	27.624	0.056361	0.00134388	3.61862	spike_level	spike_level	Root	0.0434213	Proteobacteria	Gammaproteobacteria	Burkholderiales	Methylophilaceae	Methylophilus
ASV125	73.6638	0.363788	0.000202393	148.328	spike_level	spike_level	Root	0.0128538	Proteobacteria	Gammaproteobacteria	Pseudomonadales	Pseudomonadaceae	Pseudomonas
ASV138	5.28087	0.453863	0.000893474	8.00242	spike_level	spike_level	Root	0.0323148	Proteobacteria	Gammaproteobacteria	Burkholderiales	Comamonadaceae	Acidovorax
ASV144	93.3843	-0.369957	6.22209e-06	0.0100878	spike_level	spike_level	Root	0.00194337	Proteobacteria	Alphaproteobacteria	Azospirillales	Azospirillaceae	Azospirillum
ASV292	3.41216	0.458859	0.000896675	6.38127	spike_level	spike_level	Root	0.0323148	Proteobacteria	Gammaproteobacteria	Enterobacterales	Enterobacteriaceae	Citrobacter
ASV293	34.2006	-0.0762556	0.000180885	0.405841	spike_level	spike_level	Root	0.0128538	Actinobacteriota	Actinobacteria	Micrococcales	Microbacteriaceae	NA
ASV313	48.5569	-0.0301517	0.000687773	0.14347	spike_level	spike_level	Root	0.0306878	Proteobacteria	Gammaproteobacteria	Enterobacterales	Enterobacteriaceae	Citrobacter
ASV402	34.3879	-0.0445379	0.00163854	0.273381	spike_level	spike_level	Root	0.0495263	Actinobacteriota	Actinobacteria	Micrococcales	Dermabacteraceae	Brachybacterium
ASV434	5.39112	-0.442568	5.79444e-06	0.203474	spike_level	spike_level	Root	0.00194337	Proteobacteria	Alphaproteobacteria	Sphingomonadales	Sphingomonadaceae	Sphingomonas
ASV479	6.58113	-0.174988	0.00152344	0.288656	spike_level	spike_level	Root	0.0475821	Proteobacteria	Alphaproteobacteria	Sphingomonadales	Sphingomonadaceae	Sphingomonas
ASV483	23.9487	0.592708	0.000202393	48.8974	spike_level	spike_level	Root	0.0128538	Proteobacteria	Gammaproteobacteria	Burkholderiales	Alcaligenaceae	Achromobacter
ASV492	7.44831	-0.195273	0.00111169	0.353076	spike_level	spike_level	Root	0.0385798	Actinobacteriota	Actinobacteria	Micrococcales	Microbacteriaceae	Lysinimonas
ASV542	3.79725	-0.31407	0.000593053	0.197965	spike_level	spike_level	Root	0.029431	Proteobacteria	Alphaproteobacteria	Sphingomonadales	Sphingomonadaceae	Sphingomonas
ASV650	20.4941	0.231744	0.0012296	33.2621	spike_level	spike_level	Root	0.0411478	Proteobacteria	Gammaproteobacteria	Enterobacterales	Alteromonadaceae	Rheinheimera
ASV902	14.913	0.203439	4.24211e-05	6.22374	spike_level	spike_level	Root	0.00532594	Proteobacteria	Gammaproteobacteria	Burkholderiales	Comamonadaceae	Pseudorhodoferax
ASV935	10.4206	-0.653656	0.000628197	0.0457851	spike_level	spike_level	Root	0.029431	Proteobacteria	Gammaproteobacteria	Enterobacterales	Enterobacteriaceae	NA
ASV1020	13.7674	-1.008	0.000628197	0.035045	spike_level	spike_level	Root	0.029431	Proteobacteria	Gammaproteobacteria	Enterobacterales	Enterobacteriaceae	NA
ASV1196	10.5476	0.128347	0.000807882	4.22102	spike_level	spike_level	Root	0.0323148	Proteobacteria	Gammaproteobacteria	Burkholderiales	Comamonadaceae	Variovorax
ASV1293	7.73088	-1.93603	1.62963e-05	0.0607469	spike_level	spike_level	Root	0.00254494	Actinobacteriota	Actinobacteria	Propionibacteriales	Nocardioidaceae	Aeromicrobium
ASV1353	7.70528	-0.872149	9.84541e-08	0.108441	spike_level	spike_level	Root	9.22515e-05	Proteobacteria	Alphaproteobacteria	Rhodobacterales	Rhodobacteraceae	Paracoccus
ASV1405	3.52287	-0.606385	0.00020577	0.233252	spike_level	spike_level	Root	0.0128538	Deinococcota	Deinococci	Deinococcales	Trueperaceae	Truepera
ASV1504	7.59962	-1.3859	0.000628197	0.0617313	spike_level	spike_level	Root	0.029431	Proteobacteria	Gammaproteobacteria	Enterobacterales	Yersiniaceae	NA
ASV1668	6.49372	0.27602	0.000853281	6.844	spike_level	spike_level	Root	0.0323148	Bacteroidota	Bacteroidia	Sphingobacteriales	Sphingobacteriaceae	Sphingobacterium
ASV1743	5.25209	-1.96173	0.000628197	0.0869249	spike_level	spike_level	Root	0.029431	Proteobacteria	Gammaproteobacteria	Enterobacterales	Enterobacteriaceae	NA
ASV1751	1.17281	12.5054	0.000202393	3.34563	spike_level	spike_level	Root	0.0128538	Myxococcota	Polyangia	Polyangiales	Sandaracinaceae	Sandaracinus
ASV4210	1.32053	-3.35162	4.62994e-05	0.303715	spike_level	spike_level	Root	0.00532594	Proteobacteria	Gammaproteobacteria	Enterobacterales	Enterobacteriaceae	NA
ASV45	292.92	0.00594394	0.000586249	11.9237	spike_level	spike_level	stained_soil	0.0410949	Proteobacteria	Alphaproteobacteria	Rhizobiales	Beijerinckiaceae	Methylobacterium-Methylorubrum
ASV144	25.256	-0.236148	1.62676e-05	0.026633	spike_level	spike_level	stained_soil	0.0049307	Proteobacteria	Alphaproteobacteria	Azospirillales	Azospirillaceae	Azospirillum
ASV198	97.9978	-0.0336689	0.00033273	0.0914492	spike_level	spike_level	stained_soil	0.0302902	Proteobacteria	Gammaproteobacteria	Burkholderiales	Methylophilaceae	Methylotenera
ASV236	70.9729	0.0654899	0.000588753	1.55011	spike_level	spike_level	stained_soil	0.0410949	Actinobacteriota	Actinobacteria	Propionibacteriales	Nocardioidaceae	Nocardioides
ASV314	56.0594	-0.0672541	2.33106e-06	0.254046	spike_level	spike_level	stained_soil	0.0013559	Proteobacteria	Gammaproteobacteria	Burkholderiales	Comamonadaceae	Methylibium
ASV365	55.4272	-0.0351103	0.000719555	0.0896218	spike_level	spike_level	stained_soil	0.0482932	Proteobacteria	Gammaproteobacteria	Burkholderiales	Methylophilaceae	NA
ASV505	3.95817	1.9003	0.00028171	9.48179	spike_level	spike_level	stained_soil	0.0302902	Proteobacteria	Alphaproteobacteria	Rhizobiales	Beijerinckiaceae	Bosea
ASV543	36.5506	-2.18739	0.000382827	0.0143818	spike_level	spike_level	stained_soil	0.0302902	Proteobacteria	Gammaproteobacteria	Burkholderiales	B1-7BS	NA
ASV565	2.51103	10.7942	7.52721e-05	6.38079	spike_level	spike_level	stained_soil	0.0187643	Bacteroidota	Bacteroidia	Flavobacteriales	Flavobacteriaceae	Flavobacterium
ASV573	31.2335	-0.0724612	1.69537e-05	0.101604	spike_level	spike_level	stained_soil	0.0049307	Proteobacteria	Gammaproteobacteria	Burkholderiales	Comamonadaceae	Methylibium
ASV594	3.22957	0.396962	0.000213883	5.21182	spike_level	spike_level	stained_soil	0.0302902	Proteobacteria	Alphaproteobacteria	Rhizobiales	Beijerinckiaceae	Bosea
ASV602	30.4964	-0.248829	1.12968e-08	0.0301797	spike_level	spike_level	stained_soil	1.97128e-05	Proteobacteria	Gammaproteobacteria	Burkholderiales	Comamonadaceae	Methylibium
ASV700	24.3339	0.182541	0.00039924	1.56818	spike_level	spike_level	stained_soil	0.0302902	Actinobacteriota	Thermoleophilia	Solirubrobacterales	Solirubrobacteraceae	Solirubrobacter
ASV820	19.1524	-0.282998	2.17182e-06	0.249408	spike_level	spike_level	stained_soil	0.0013559	Proteobacteria	Gammaproteobacteria	Burkholderiales	Comamonadaceae	Methylibium
ASV1536	10.1093	-21.736	9.77598e-06	0.0501128	spike_level	spike_level	stained_soil	0.00426477	Proteobacteria	Gammaproteobacteria	Burkholderiales	Methylophilaceae	Methylotenera
ASV1708	8.77263	-0.93514	0.000382827	0.0573109	spike_level	spike_level	stained_soil	0.0302902	Proteobacteria	Alphaproteobacteria	Rhizobiales	Hyphomicrobiaceae	Hyphomicrobium
ASV1721	6.82403	-2.6374	0.000124597	0.0724897	spike_level	spike_level	stained_soil	0.0197656	Proteobacteria	Gammaproteobacteria	Burkholderiales	Rhodocyclaceae	Methyloversatilis
ASV1732	4.76323	0.390105	0.000299654	8.55847	spike_level	spike_level	stained_soil	0.0302902	Proteobacteria	Alphaproteobacteria	Rhizobiales	Xanthobacteraceae	Rhodopseudomonas
ASV1754	3.96567	0.567219	0.000334663	7.71426	spike_level	spike_level	stained_soil	0.0302902	Proteobacteria	Alphaproteobacteria	Rhizobiales	Beijerinckiaceae	NA
ASV2022	4.4775	3.66234	0.00028171	10.5946	spike_level	spike_level	stained_soil	0.0302902	Proteobacteria	Alphaproteobacteria	Rhizobiales	Beijerinckiaceae	Methylobacterium-Methylorubrum
ASV2158	4.78023	-26.7653	0.000382827	0.100372	spike_level	spike_level	stained_soil	0.0302902	Proteobacteria	Gammaproteobacteria	Xanthomonadales	Xanthomonadaceae	Arenimonas
ASV2209	1.38963	8.93981	0.00028171	3.97779	spike_level	spike_level	stained_soil	0.0302902	Bacteroidota	Bacteroidia	Flavobacteriales	Weeksellaceae	Chryseobacterium
ASV2594	1.71787	7.69935	0.00028171	4.68114	spike_level	spike_level	stained_soil	0.0302902	Proteobacteria	Alphaproteobacteria	Caulobacterales	Hyphomonadaceae	SWB02
ASV3342	2.90263	-4.43296	0.000124597	0.155221	spike_level	spike_level	stained_soil	0.0197656	Proteobacteria	Gammaproteobacteria	Burkholderiales	Nitrosomonadaceae	966-1
ASV4221	1.85363	-10.352	0.000124597	0.223436	spike_level	spike_level	stained_soil	0.0197656	Proteobacteria	Gammaproteobacteria	Diplorickettsiales	Diplorickettsiaceae	Aquicella
ASV4319	1.92123	-6.1513	0.000124597	0.217282	spike_level	spike_level	stained_soil	0.0197656	Proteobacteria	Gammaproteobacteria	Xanthomonadales	Xanthomonadaceae	Arenimonas
ASV706	12.6161	4.30649	0.000570862	26.2321	soil_type	soil_type	Plant	0.0376769	Proteobacteria	Gammaproteobacteria	Burkholderiales	Oxalobacteraceae	Massilia
ASV8	347.821	0.0135243	4.4495e-06	7.89837	soil_type	soil_type	Root	7.31435e-05	Proteobacteria	Gammaproteobacteria	Pseudomonadales	Pseudomonadaceae	Pseudomonas
ASV14	748.787	0.00311955	0.000467404	3.30281	soil_type	soil_type	Root	0.00220079	Proteobacteria	Gammaproteobacteria	Pseudomonadales	Pseudomonadaceae	Pseudomonas
ASV22	298.878	-0.00366405	0.00626072	0.251568	soil_type	soil_type	Root	0.0171529	Proteobacteria	Gammaproteobacteria	Enterobacterales	Enterobacteriaceae	Citrobacter
ASV23	623.178	0.0086852	6.11068e-07	7.01654	soil_type	soil_type	Root	1.68403e-05	Proteobacteria	Gammaproteobacteria	Pseudomonadales	Pseudomonadaceae	Pseudomonas
ASV26	522.243	-0.00474005	0.000263966	0.372954	soil_type	soil_type	Root	0.00131562	Proteobacteria	Gammaproteobacteria	Pseudomonadales	Pseudomonadaceae	Pseudomonas
ASV29	348.407	-0.00242909	0.0142442	0.330455	soil_type	soil_type	Root	0.032874	Proteobacteria	Gammaproteobacteria	Pseudomonadales	Pseudomonadaceae	Pseudomonas
ASV30	489.747	-0.00382884	0.00184005	0.105046	soil_type	soil_type	Root	0.00611393	Proteobacteria	Gammaproteobacteria	Pseudomonadales	Pseudomonadaceae	Pseudomonas
ASV31	524.766	0.00466688	2.07662e-05	7.48971	soil_type	soil_type	Root	0.000223654	Proteobacteria	Gammaproteobacteria	Enterobacterales	Aeromonadaceae	Aeromonas
ASV32	515.694	0.00350706	0.00019809	5.44952	soil_type	soil_type	Root	0.00104199	Proteobacteria	Gammaproteobacteria	Enterobacterales	Aeromonadaceae	Aeromonas
ASV33	102.711	0.0724201	1.45232e-08	3.26529	soil_type	soil_type	Root	8.41269e-07	Actinobacteriota	Actinobacteria	Micrococcales	Intrasporangiaceae	Intrasporangium
ASV35	25.8153	0.0923523	0.000199078	3.74217	soil_type	soil_type	Root	0.00104199	Proteobacteria	Gammaproteobacteria	Burkholderiales	Methylophilaceae	MM2
ASV36	119.989	0.16014	0.00504074	216.95	soil_type	soil_type	Root	0.0143126	Proteobacteria	Gammaproteobacteria	Pseudomonadales	Pseudomonadaceae	Pseudomonas
ASV43	234.502	0.00555719	0.00631925	2.93137	soil_type	soil_type	Root	0.0172126	Proteobacteria	Gammaproteobacteria	Xanthomonadales	Xanthomonadaceae	Stenotrophomonas
ASV45	100.948	0.103159	1.28411e-09	5.97327	soil_type	soil_type	Root	1.13722e-07	Proteobacteria	Alphaproteobacteria	Rhizobiales	Beijerinckiaceae	Methylobacterium-Methylorubrum
ASV54	283.309	-0.0132454	9.61567e-05	0.0673138	soil_type	soil_type	Root	0.000667399	Proteobacteria	Gammaproteobacteria	Pseudomonadales	Pseudomonadaceae	Pseudomonas
ASV63	38.0126	0.0397376	0.0152367	1.74017	soil_type	soil_type	Root	0.0349065	Proteobacteria	Gammaproteobacteria	Burkholderiales	Methylophilaceae	Methylophilus
ASV66	41.929	0.0952756	0.000175942	1.85884	soil_type	soil_type	Root	0.00104199	Actinobacteriota	Thermoleophilia	Gaiellales	Gaiellaceae	Gaiella
ASV69	42.0517	0.0590236	0.000749405	2.08172	soil_type	soil_type	Root	0.00287784	Actinobacteriota	Actinobacteria	Micrococcales	Intrasporangiaceae	NA
ASV76	201.502	-0.00541435	0.00894993	0.227504	soil_type	soil_type	Root	0.0231022	Proteobacteria	Gammaproteobacteria	Pseudomonadales	Pseudomonadaceae	Pseudomonas
ASV78	177.294	-0.0765194	4.2913e-10	0.0858405	soil_type	soil_type	Root	6.70158e-08	Proteobacteria	Gammaproteobacteria	Pseudomonadales	Pseudomonadaceae	Pseudomonas
ASV81	148.649	0.0170691	0.000469928	2.4793	soil_type	soil_type	Root	0.00220161	Proteobacteria	Gammaproteobacteria	Xanthomonadales	Xanthomonadaceae	Pseudoxanthomonas
ASV82	4.57534	-0.536438	1.32489e-05	0.271395	soil_type	soil_type	Root	0.000174848	Firmicutes	Clostridia	Peptostreptococcales-Tissierellales	Peptostreptococcaceae	Romboutsia
ASV85	26.562	-0.0559796	0.00272956	0.330677	soil_type	soil_type	Root	0.00855382	Proteobacteria	Gammaproteobacteria	Burkholderiales	Methylophilaceae	Methylophilus
ASV96	14.8029	0.155323	5.66563e-06	8.98208	soil_type	soil_type	Root	8.99779e-05	Proteobacteria	Gammaproteobacteria	Burkholderiales	Comamonadaceae	Methylibium
ASV98	46.8956	-0.0466055	0.00639814	0.608749	soil_type	soil_type	Root	0.0172768	Proteobacteria	Alphaproteobacteria	Rhizobiales	Xanthobacteraceae	Bradyrhizobium
ASV106	140.801	-0.0067908	0.017839	0.292515	soil_type	soil_type	Root	0.0401806	Proteobacteria	Gammaproteobacteria	Pseudomonadales	Pseudomonadaceae	Pseudomonas
ASV107	24.7307	-0.232248	1.61158e-06	0.330441	soil_type	soil_type	Root	3.35567e-05	Actinobacteriota	Thermoleophilia	Gaiellales	Gaiellaceae	Gaiella
ASV109	114.493	-0.107302	0.000202393	0.00434811	soil_type	soil_type	Root	0.00104199	Proteobacteria	Gammaproteobacteria	Pseudomonadales	Pseudomonadaceae	Pseudomonas
ASV122	17.4278	-145.127	2.73015e-11	0.220355	soil_type	soil_type	Root	5.1163e-09	Firmicutes	Bacilli	Bacillales	Bacillaceae	Bacillus
ASV123	26.9071	0.0732633	0.00189174	2.11183	soil_type	soil_type	Root	0.00626347	Actinobacteriota	Actinobacteria	Micrococcales	Intrasporangiaceae	NA
ASV136	20.3143	-0.188311	3.87942e-05	0.364488	soil_type	soil_type	Root	0.000382634	Actinobacteriota	Thermoleophilia	Gaiellales	Gaiellaceae	Gaiella
ASV142	16.9991	-0.155794	0.000190661	0.451001	soil_type	soil_type	Root	0.00104199	Proteobacteria	Alphaproteobacteria	Rhizobiales	Methyloligellaceae	NA
ASV148	104.29	-0.010256	0.00924707	0.279764	soil_type	soil_type	Root	0.0234811	Proteobacteria	Gammaproteobacteria	Enterobacterales	Shewanellaceae	Shewanella
ASV153	16.1235	0.624485	1.13861e-08	3.31812	soil_type	soil_type	Root	8.20678e-07	Actinobacteriota	Actinobacteria	Propionibacteriales	Nocardioidaceae	Nocardioides
ASV163	19.6359	0.0844189	0.0152834	1.61121	soil_type	soil_type	Root	0.0349281	Gemmatimonadota	Gemmatimonadetes	Gemmatimonadales	Gemmatimonadaceae	NA
ASV164	12.4402	-0.101119	0.00860532	0.482198	soil_type	soil_type	Root	0.0223977	Proteobacteria	Gammaproteobacteria	Steroidobacterales	Steroidobacteraceae	Steroidobacter
ASV167	30.8905	0.472741	5.32398e-10	20.2373	soil_type	soil_type	Root	7.12653e-08	Actinobacteriota	Actinobacteria	Micrococcales	Intrasporangiaceae	Terrabacter
ASV168	16.3377	0.367726	1.45642e-09	10.516	soil_type	soil_type	Root	1.13722e-07	Actinobacteriota	Rubrobacteria	Rubrobacterales	Rubrobacteriaceae	Rubrobacter
ASV170	19.7696	-0.0395857	0.0222913	0.266683	soil_type	soil_type	Root	0.0484616	Proteobacteria	Gammaproteobacteria	Burkholderiales	Methylophilaceae	Methylobacillus
ASV172	16.9049	-7.29251	2.73015e-11	0.0434379	soil_type	soil_type	Root	5.1163e-09	Proteobacteria	Alphaproteobacteria	Rhizobiales	Hyphomicrobiaceae	Hyphomicrobium
ASV179	15.1055	-0.185431	8.22415e-06	0.244779	soil_type	soil_type	Root	0.000120407	Actinobacteriota	Actinobacteria	Propionibacteriales	Nocardioidaceae	Nocardioides
ASV181	26.4673	-0.134084	1.4307e-06	0.255964	soil_type	soil_type	Root	3.04673e-05	Actinobacteriota	Actinobacteria	Streptomycetales	Streptomycetaceae	Streptomyces
ASV182	7.40528	-0.196531	0.000998609	0.333001	soil_type	soil_type	Root	0.00365506	Nitrospirota	Nitrospiria	Nitrospirales	Nitrospiraceae	Nitrospira
ASV185	6.14416	0.254085	0.000133442	6.97812	soil_type	soil_type	Root	0.000897527	Proteobacteria	Gammaproteobacteria	Burkholderiales	Methylophilaceae	Methylotenera
ASV191	16.909	0.321397	2.07328e-08	5.60497	soil_type	soil_type	Root	9.7133e-07	Actinobacteriota	Actinobacteria	Micrococcales	Intrasporangiaceae	Intrasporangium
ASV193	29.7509	0.122208	0.000384035	1.69074	soil_type	soil_type	Root	0.00184534	Actinobacteriota	Actinobacteria	Streptomycetales	Streptomycetaceae	Streptomyces
ASV205	18.1001	-0.126851	0.000616254	0.454262	soil_type	soil_type	Root	0.00248363	Actinobacteriota	Actinobacteria	Corynebacteriales	Mycobacteriaceae	Mycobacterium
ASV211	59.4133	0.0284371	0.0217906	33.493	soil_type	soil_type	Root	0.0477051	Proteobacteria	Gammaproteobacteria	Enterobacterales	Enterobacteriaceae	NA
ASV212	16.2986	0.329076	6.98056e-06	1.95633	soil_type	soil_type	Root	0.000105497	Firmicutes	Bacilli	Bacillales	Bacillaceae	NA
ASV217	9.20322	0.12279	0.0130359	1.96247	soil_type	soil_type	Root	0.0306601	Actinobacteriota	Actinobacteria	Propionibacteriales	Nocardioidaceae	Nocardioides
ASV221	65.0784	-0.0546407	4.63465e-06	0.25379	soil_type	soil_type	Root	7.48735e-05	Proteobacteria	Gammaproteobacteria	Burkholderiales	Alcaligenaceae	Achromobacter
ASV223	13.3543	0.148003	9.82326e-05	3.85922	soil_type	soil_type	Root	0.000676794	Actinobacteriota	Actinobacteria	Micrococcales	Intrasporangiaceae	NA
ASV227	11.0421	-0.310449	5.95191e-05	0.304557	soil_type	soil_type	Root	0.000444641	Proteobacteria	Alphaproteobacteria	Sphingomonadales	Sphingomonadaceae	Sphingomonas
ASV230	70.369	-0.0440007	8.89164e-06	0.103254	soil_type	soil_type	Root	0.000126234	Proteobacteria	Gammaproteobacteria	Pseudomonadales	Pseudomonadaceae	Pseudomonas
ASV234	40.7879	0.112724	9.63177e-06	4.71862	soil_type	soil_type	Root	0.000134701	Proteobacteria	Alphaproteobacteria	Rhizobiales	Beijerinckiaceae	Methylobacterium-Methylorubrum
ASV237	12.5123	-0.119529	0.00417903	0.4802	soil_type	soil_type	Root	0.0123525	Acidobacteriota	Blastocatellia	Pyrinomonadales	Pyrinomonadaceae	RB41
ASV241	13.1326	0.308613	3.26875e-05	2.0665	soil_type	soil_type	Root	0.000336574	Proteobacteria	Alphaproteobacteria	Rhodobacterales	Rhodobacteraceae	Amaricoccus
ASV243	17.4801	-0.126359	0.000779028	0.431232	soil_type	soil_type	Root	0.0029591	Actinobacteriota	Thermoleophilia	Solirubrobacterales	67-14	NA
ASV244	26.6742	0.126362	0.000338702	1.90938	soil_type	soil_type	Root	0.00167034	Proteobacteria	Alphaproteobacteria	Rhizobiales	Devosiaceae	NA
ASV249	20.9877	0.251161	2.80943e-06	2.45073	soil_type	soil_type	Root	5.60092e-05	Chloroflexi	Chloroflexia	Thermomicrobiales	JG30-KF-CM45	NA
ASV255	8.17159	2.59981	1.35416e-07	17.3432	soil_type	soil_type	Root	4.22948e-06	Actinobacteriota	Thermoleophilia	Solirubrobacterales	67-14	NA
ASV256	12.6183	0.345719	2.78821e-08	8.86345	soil_type	soil_type	Root	1.18752e-06	Proteobacteria	Alphaproteobacteria	Rhizobiales	Beijerinckiaceae	Microvirga
ASV257	42.9949	2.16238	2.73015e-11	46.2809	soil_type	soil_type	Root	5.1163e-09	Proteobacteria	Gammaproteobacteria	Burkholderiales	Burkholderiaceae	Burkholderia-Caballeronia-Paraburkholderia
ASV258	35.3678	0.0672119	6.38686e-05	4.89701	soil_type	soil_type	Root	0.000463913	Proteobacteria	Alphaproteobacteria	Rhizobiales	Beijerinckiaceae	Methylobacterium-Methylorubrum
ASV262	7.55994	0.307551	3.877e-06	5.1308	soil_type	soil_type	Root	6.66044e-05	Actinobacteriota	Thermoleophilia	Solirubrobacterales	67-14	NA
ASV263	33.5003	0.15836	1.05976e-06	3.74498	soil_type	soil_type	Root	2.30929e-05	Actinobacteriota	Actinobacteria	Propionibacteriales	Nocardioidaceae	Nocardioides
ASV265	6.91506	0.20554	0.00175726	2.48561	soil_type	soil_type	Root	0.00594424	Actinobacteriota	Actinobacteria	Frankiales	Sporichthyaceae	NA
ASV266	2.23884	-0.377647	0.00949722	0.456826	soil_type	soil_type	Root	0.0239218	Firmicutes	Clostridia	Clostridiales	Clostridiaceae	Clostridium sensu stricto 1
ASV268	57.1087	-0.0396476	0.000338244	0.0876811	soil_type	soil_type	Root	0.00167034	Proteobacteria	Alphaproteobacteria	Rhizobiales	Rhizobiaceae	NA
ASV269	9.10559	0.616784	1.39433e-08	11.8208	soil_type	soil_type	Root	8.41269e-07	Actinobacteriota	Actinobacteria	Propionibacteriales	Propionibacteriaceae	NA
ASV273	24.1227	0.0867922	0.00179424	2.08917	soil_type	soil_type	Root	0.00600598	Actinobacteriota	Actinobacteria	Micromonosporales	Micromonosporaceae	NA
ASV275	45.8989	0.0300524	0.0134497	24.9012	soil_type	soil_type	Root	0.0314275	Proteobacteria	Gammaproteobacteria	Enterobacterales	Enterobacteriaceae	NA
ASV279	8.5195	-0.277439	7.34935e-06	0.203524	soil_type	soil_type	Root	0.000109307	Firmicutes	Bacilli	Bacillales	Bacillaceae	Bacillus
ASV286	5.59687	-10.4763	8.0522e-07	0.0820092	soil_type	soil_type	Root	1.79641e-05	Proteobacteria	Gammaproteobacteria	Burkholderiales	Methylophilaceae	Methylotenera
ASV289	10.5266	-0.233424	9.96782e-06	0.27711	soil_type	soil_type	Root	0.000136369	Nitrospirota	Nitrospiria	Nitrospirales	Nitrospiraceae	Nitrospira
ASV305	6.95641	0.449755	6.75478e-07	10.7065	soil_type	soil_type	Root	1.75812e-05	Actinobacteriota	Actinobacteria	Propionibacteriales	Propionibacteriaceae	Microlunatus
ASV307	8.22959	0.18386	0.000172055	3.8922	soil_type	soil_type	Root	0.00104199	Actinobacteriota	Actinobacteria	Micromonosporales	Micromonosporaceae	Luedemannella
ASV308	20.1849	0.0902331	0.0217368	1.45809	soil_type	soil_type	Root	0.0476987	Actinobacteriota	Actinobacteria	Micrococcales	Microbacteriaceae	Agromyces
ASV311	14.7011	0.104976	0.000374744	3.88702	soil_type	soil_type	Root	0.0018103	Actinobacteriota	Actinobacteria	Micrococcales	Microbacteriaceae	Agromyces
ASV312	19.244	0.0835588	0.00474529	2.01917	soil_type	soil_type	Root	0.0135974	Chloroflexi	Chloroflexia	Thermomicrobiales	JG30-KF-CM45	NA
ASV314	7.45097	-0.0972111	0.0112242	0.275059	soil_type	soil_type	Root	0.0271425	Proteobacteria	Gammaproteobacteria	Burkholderiales	Comamonadaceae	Methylibium
ASV322	6.7475	-0.182249	0.0116542	0.470297	soil_type	soil_type	Root	0.0277281	Proteobacteria	Alphaproteobacteria	Defluviicoccales	Defluviicoccaceae	Defluviicoccus
ASV323	10.2491	0.213888	0.000395207	2.25779	soil_type	soil_type	Root	0.00188933	Firmicutes	Bacilli	Bacillales	Bacillaceae	NA
ASV325	7.99975	0.290314	3.56432e-05	5.00058	soil_type	soil_type	Root	0.000359115	Proteobacteria	Gammaproteobacteria	Burkholderiales	Comamonadaceae	Ramlibacter
ASV328	8.32009	0.180912	0.000156882	4.93141	soil_type	soil_type	Root	0.00102796	Actinobacteriota	Thermoleophilia	Solirubrobacterales	Solirubrobacteraceae	Solirubrobacter
ASV329	5.33306	1.87666	6.02662e-05	11.6661	soil_type	soil_type	Root	0.000444641	Nitrospirota	Nitrospiria	Nitrospirales	Nitrospiraceae	Nitrospira
ASV330	12.7187	0.0716186	0.00333271	5.68471	soil_type	soil_type	Root	0.0101388	Firmicutes	Bacilli	Paenibacillales	Paenibacillaceae	Paenibacillus
ASV331	6.98169	0.374951	2.49595e-05	2.94498	soil_type	soil_type	Root	0.000259856	Actinobacteriota	Acidimicrobiia	Microtrichales	Iamiaceae	Iamia
ASV335	45.0427	0.187701	2.46563e-07	5.71234	soil_type	soil_type	Root	7.21966e-06	Proteobacteria	Gammaproteobacteria	Burkholderiales	Comamonadaceae	Variovorax
ASV340	8.70047	1.89668	1.35416e-07	18.4009	soil_type	soil_type	Root	4.22948e-06	Chloroflexi	Chloroflexia	Chloroflexales	Roseiflexaceae	NA
ASV344	5.75263	-8.79591	2.73015e-11	0.0799664	soil_type	soil_type	Root	5.1163e-09	Proteobacteria	Gammaproteobacteria	Burkholderiales	SC-I-84	NA
ASV356	4.2435	-0.182526	0.0178031	0.409661	soil_type	soil_type	Root	0.0401806	Proteobacteria	Alphaproteobacteria	Defluviicoccales	Defluviicoccaceae	Defluviicoccus
ASV358	6.71197	0.30185	8.51233e-05	3.39859	soil_type	soil_type	Root	0.000608859	Actinobacteriota	Acidimicrobiia	Microtrichales	Iamiaceae	Iamia
ASV361	10.4503	0.150903	0.00667278	1.9147	soil_type	soil_type	Root	0.0179475	Actinobacteriota	Actinobacteria	Pseudonocardiales	Pseudonocardiaceae	Pseudonocardia
ASV363	4.66884	-0.178557	0.00630555	0.180963	soil_type	soil_type	Root	0.0172126	Actinobacteriota	Thermoleophilia	Gaiellales	Gaiellaceae	Gaiella
ASV367	40.7938	-0.154342	0.00014757	0.0234927	soil_type	soil_type	Root	0.00098066	Proteobacteria	Gammaproteobacteria	Burkholderiales	Oxalobacteraceae	Oxalicibacterium
ASV368	5.28453	0.188992	0.00995794	2.19306	soil_type	soil_type	Root	0.0248154	Gemmatimonadota	Gemmatimonadetes	Gemmatimonadales	Gemmatimonadaceae	Gemmatimonas
ASV382	2.07756	0.353046	0.0091575	3.26458	soil_type	soil_type	Root	0.0233168	Proteobacteria	Gammaproteobacteria	Burkholderiales	Methylophilaceae	MM2
ASV384	39.8914	-0.0717944	0.000132256	0.0474083	soil_type	soil_type	Root	0.000897527	Proteobacteria	Gammaproteobacteria	Enterobacterales	Alteromonadaceae	Rheinheimera
ASV385	10.543	0.172998	0.000201265	3.15387	soil_type	soil_type	Root	0.00104199	Proteobacteria	Alphaproteobacteria	Tistrellales	Geminicoccaceae	Candidatus Alysiosphaera
ASV386	10.5858	0.149006	6.65155e-05	11.8379	soil_type	soil_type	Root	0.000479423	Actinobacteriota	Actinobacteria	Micrococcales	Intrasporangiaceae	Intrasporangium
ASV398	3.384	-0.309262	0.00268	0.271243	soil_type	soil_type	Root	0.00843364	Proteobacteria	Gammaproteobacteria	Burkholderiales	Nitrosomonadaceae	Ellin6067
ASV399	32.3533	-0.0606372	0.000822611	0.346724	soil_type	soil_type	Root	0.00308315	Proteobacteria	Alphaproteobacteria	Rhizobiales	Rhizobiaceae	Allorhizobium-Neorhizobium-Pararhizobium-Rhizobium
ASV408	28.727	0.180092	1.57366e-05	2.6126	soil_type	soil_type	Root	0.000181782	Proteobacteria	Gammaproteobacteria	Burkholderiales	Comamonadaceae	Variovorax
ASV409	8.72041	0.163758	0.0086975	2.06583	soil_type	soil_type	Root	0.022575	Actinobacteriota	Actinobacteria	Micromonosporales	Micromonosporaceae	Dactylosporangium
ASV411	6.41878	0.149522	0.00436486	4.22231	soil_type	soil_type	Root	0.0127015	Actinobacteriota	Rubrobacteria	Rubrobacterales	Rubrobacteriaceae	Rubrobacter
ASV416	9.48484	-0.154703	0.0125482	0.576735	soil_type	soil_type	Root	0.0296911	Gemmatimonadota	Gemmatimonadetes	Gemmatimonadales	Gemmatimonadaceae	NA
ASV418	8.85419	-0.185164	0.00015271	0.218498	soil_type	soil_type	Root	0.00100767	Proteobacteria	Alphaproteobacteria	Rhizobiales	Hyphomicrobiaceae	Hyphomicrobium
ASV421	1.38825	-14.8458	0.000202393	0.264795	soil_type	soil_type	Root	0.00104199	Proteobacteria	Gammaproteobacteria	Burkholderiales	Methylophilaceae	Methylotenera
ASV423	7.18669	-0.334549	1.00421e-05	0.225661	soil_type	soil_type	Root	0.000136369	Actinobacteriota	Actinobacteria	Pseudonocardiales	Pseudonocardiaceae	Pseudonocardia
ASV424	21.7327	0.0980463	0.000780041	2.39927	soil_type	soil_type	Root	0.0029591	Acidobacteriota	Blastocatellia	Blastocatellales	Blastocatellaceae	NA
ASV429	33.2963	-0.026858	0.0109339	0.204774	soil_type	soil_type	Root	0.0266798	Proteobacteria	Gammaproteobacteria	Pseudomonadales	Pseudomonadaceae	Pseudomonas
ASV433	2.60959	0.475741	0.000907107	2.8613	soil_type	soil_type	Root	0.0033463	Chloroflexi	Chloroflexia	Chloroflexales	Roseiflexaceae	NA
ASV438	2.14581	4.30261	6.02662e-05	5.29162	soil_type	soil_type	Root	0.000444641	Bacteroidota	Bacteroidia	Chitinophagales	Chitinophagaceae	NA
ASV440	6.83322	-3.13689	8.0522e-07	0.0681829	soil_type	soil_type	Root	1.79641e-05	Actinobacteriota	Thermoleophilia	Solirubrobacterales	67-14	NA
ASV441	7.17578	-0.173392	0.0168349	0.547665	soil_type	soil_type	Root	0.0381022	Proteobacteria	Alphaproteobacteria	Rhizobiales	Beijerinckiaceae	Microvirga
ASV443	5.67653	-0.140823	0.0226683	0.46364	soil_type	soil_type	Root	0.0490285	Firmicutes	Bacilli	Bacillales	Bacillaceae	Bacillus
ASV452	4.09053	0.194945	0.018694	2.62009	soil_type	soil_type	Root	0.041805	Acidobacteriota	Vicinamibacteria	Vicinamibacterales	Vicinamibacteraceae	NA
ASV453	12.7402	-0.355637	2.17591e-07	0.163405	soil_type	soil_type	Root	6.57686e-06	Proteobacteria	Alphaproteobacteria	Dongiales	Dongiaceae	Dongia
ASV470	4.01691	-0.692504	8.6664e-06	0.148042	soil_type	soil_type	Root	0.000124929	Proteobacteria	Alphaproteobacteria	Rhizobiales	Hyphomicrobiaceae	Hyphomicrobium
ASV474	30.7029	0.0379658	0.0110128	2.71718	soil_type	soil_type	Root	0.0267333	Proteobacteria	Gammaproteobacteria	Burkholderiales	Comamonadaceae	Pseudorhodoferax
ASV479	6.58113	-0.167175	0.00213525	0.301194	soil_type	soil_type	Root	0.00689907	Proteobacteria	Alphaproteobacteria	Sphingomonadales	Sphingomonadaceae	Sphingomonas
ASV481	2.91119	-6.05695	6.02662e-05	0.146577	soil_type	soil_type	Root	0.000444641	Proteobacteria	Alphaproteobacteria	Rhodobacterales	Rhodobacteraceae	NA
ASV490	2.01006	0.277943	0.0188011	2.89621	soil_type	soil_type	Root	0.0419443	Bacteroidota	Bacteroidia	Chitinophagales	Chitinophagaceae	NA
ASV494	2.94547	0.865182	6.84489e-06	5.17535	soil_type	soil_type	Root	0.000105142	Proteobacteria	Gammaproteobacteria	Burkholderiales	Nitrosomonadaceae	MND1
ASV495	28.046	-0.035383	0.00539766	0.284161	soil_type	soil_type	Root	0.015188	Actinobacteriota	Actinobacteria	Micrococcales	Brevibacteriaceae	Brevibacterium
ASV496	6.39294	-0.210874	0.0018386	0.395231	soil_type	soil_type	Root	0.00611393	Actinobacteriota	Actinobacteria	Propionibacteriales	Nocardioidaceae	Nocardioides
ASV498	4.74619	-0.21727	0.00145179	0.215329	soil_type	soil_type	Root	0.00507133	Proteobacteria	Gammaproteobacteria	Burkholderiales	Methylophilaceae	Methylophilus
ASV506	30.0053	0.112011	5.65797e-05	12.0715	soil_type	soil_type	Root	0.000444641	Proteobacteria	Gammaproteobacteria	Pseudomonadales	Pseudomonadaceae	Pseudomonas
ASV508	16.4152	0.0973483	0.00837836	1.82986	soil_type	soil_type	Root	0.0219288	Proteobacteria	Alphaproteobacteria	Rhizobiales	Beijerinckiaceae	Bosea
ASV509	2.29813	0.245976	0.0204553	2.67364	soil_type	soil_type	Root	0.044992	Actinobacteriota	Actinobacteria	Propionibacteriales	Nocardioidaceae	NA
ASV519	11.4198	-0.144817	0.00212848	0.460317	soil_type	soil_type	Root	0.00689907	Proteobacteria	Alphaproteobacteria	Rhizobiales	Devosiaceae	Devosia
ASV523	18.8025	0.0652803	0.00935156	3.0997	soil_type	soil_type	Root	0.0236733	Proteobacteria	Alphaproteobacteria	Sphingomonadales	Sphingomonadaceae	Sphingobium
ASV526	27.4984	-0.888427	1.35416e-07	0.0178582	soil_type	soil_type	Root	4.22948e-06	Proteobacteria	Gammaproteobacteria	Pseudomonadales	Pseudomonadaceae	Pseudomonas
ASV537	4.28125	-2.48947	1.62963e-05	0.104575	soil_type	soil_type	Root	0.000181782	Actinobacteriota	Acidimicrobiia	Microtrichales	Ilumatobacteraceae	NA
ASV539	2.87516	0.372221	0.00252512	2.78641	soil_type	soil_type	Root	0.0080752	Actinobacteriota	Thermoleophilia	Gaiellales	Gaiellaceae	Gaiella
ASV541	4.2525	-0.801671	1.16234e-07	0.134419	soil_type	soil_type	Root	4.22948e-06	Proteobacteria	Gammaproteobacteria	Burkholderiales	SC-I-84	NA
ASV542	3.79725	0.26604	0.00155009	4.39604	soil_type	soil_type	Root	0.00532028	Proteobacteria	Alphaproteobacteria	Sphingomonadales	Sphingomonadaceae	Sphingomonas
ASV545	7.58491	-1.67717	3.90954e-06	0.0618436	soil_type	soil_type	Root	6.66044e-05	Actinobacteriota	Actinobacteria	Propionibacteriales	Nocardioidaceae	Nocardioides
ASV555	4.53741	0.42226	3.36776e-05	5.21678	soil_type	soil_type	Root	0.000343	Actinobacteriota	Acidimicrobiia	Microtrichales	Ilumatobacteraceae	NA
ASV556	3.89791	0.489589	9.47912e-05	4.80988	soil_type	soil_type	Root	0.000662831	Chloroflexi	Chloroflexia	Thermomicrobiales	AKYG1722	NA
ASV558	13.3728	0.129099	0.00275152	2.43313	soil_type	soil_type	Root	0.00859393	Actinobacteriota	Actinobacteria	Propionibacteriales	Nocardioidaceae	Nocardioides
ASV566	8.11275	0.229608	9.095e-05	3.95839	soil_type	soil_type	Root	0.000640753	Actinobacteriota	Actinobacteria	Pseudonocardiales	Pseudonocardiaceae	Actinomycetospora
ASV574	7.57597	0.725282	2.74409e-07	8.80006	soil_type	soil_type	Root	7.79155e-06	Proteobacteria	Gammaproteobacteria	Xanthomonadales	Xanthomonadaceae	NA
ASV576	7.86037	-2.60826	1.33946e-09	0.0598059	soil_type	soil_type	Root	1.13722e-07	Chloroflexi	Chloroflexia	Thermomicrobiales	JG30-KF-CM45	NA
ASV580	3.549	-0.654843	1.46142e-05	0.148094	soil_type	soil_type	Root	0.000181782	Proteobacteria	Alphaproteobacteria	Rhizobiales	Xanthobacteraceae	NA
ASV584	2.33394	0.532217	0.00102282	3.70542	soil_type	soil_type	Root	0.0037039	Acidobacteriota	Vicinamibacteria	Vicinamibacterales	Vicinamibacteraceae	NA
ASV585	20.0617	0.0868824	0.00315409	8.94166	soil_type	soil_type	Root	0.00968976	Proteobacteria	Gammaproteobacteria	Xanthomonadales	Xanthomonadaceae	Stenotrophomonas
ASV590	5.08816	-4.60371	1.70588e-08	0.0894749	soil_type	soil_type	Root	8.41269e-07	Actinobacteriota	Actinobacteria	Corynebacteriales	Nocardiaceae	NA
ASV591	4.84559	-6.57785	1.33946e-09	0.093535	soil_type	soil_type	Root	1.13722e-07	Proteobacteria	Alphaproteobacteria	Rhodobacterales	Rhodobacteraceae	Amaricoccus
ASV594	2.22713	0.235897	0.0227091	2.89705	soil_type	soil_type	Root	0.0490285	Proteobacteria	Alphaproteobacteria	Rhizobiales	Beijerinckiaceae	Bosea
ASV596	3.25303	0.53883	2.45065e-05	5.68223	soil_type	soil_type	Root	0.000258006	Actinobacteriota	Thermoleophilia	Solirubrobacterales	Solirubrobacteraceae	Solirubrobacter
ASV603	22.6948	-0.0590619	0.000906394	0.234959	soil_type	soil_type	Root	0.0033463	Actinobacteriota	Actinobacteria	Micrococcales	Brevibacteriaceae	Brevibacterium
ASV605	6.76859	-11.177	2.73015e-11	0.0687891	soil_type	soil_type	Root	5.1163e-09	Proteobacteria	Gammaproteobacteria	Xanthomonadales	Xanthomonadaceae	Thermomonas
ASV610	3.89678	-0.449223	0.000134102	0.136614	soil_type	soil_type	Root	0.000897527	Actinobacteriota	Actinobacteria	Propionibacteriales	Nocardioidaceae	Nocardioides
ASV613	4.04803	-4.07002	1.70588e-08	0.109938	soil_type	soil_type	Root	8.41269e-07	Proteobacteria	Alphaproteobacteria	Dongiales	Dongiaceae	Dongia
ASV620	4.94613	3.70585	3.90954e-06	10.8923	soil_type	soil_type	Root	6.66044e-05	Actinobacteriota	Actinobacteria	Propionibacteriales	Nocardioidaceae	Nocardioides
ASV623	4.94116	0.200857	0.00144712	5.67757	soil_type	soil_type	Root	0.00507133	Proteobacteria	Gammaproteobacteria	Steroidobacterales	Steroidobacteraceae	Steroidobacter
ASV644	4.49541	-3.74615	3.90954e-06	0.100092	soil_type	soil_type	Root	6.66044e-05	Gemmatimonadota	Gemmatimonadetes	Gemmatimonadales	Gemmatimonadaceae	NA
ASV645	4.89797	-0.143042	0.00984522	0.27441	soil_type	soil_type	Root	0.0245999	Proteobacteria	Alphaproteobacteria	Sphingomonadales	Sphingomonadaceae	Sphingomonas
ASV646	2.59466	0.295708	0.011268	2.99809	soil_type	soil_type	Root	0.0271425	Acidobacteriota	Vicinamibacteria	Vicinamibacterales	Vicinamibacteraceae	NA
ASV650	20.4941	-4.17339	0.000202393	0.0238162	soil_type	soil_type	Root	0.00104199	Proteobacteria	Gammaproteobacteria	Enterobacterales	Alteromonadaceae	Rheinheimera
ASV666	3.09906	1.15701	2.53782e-08	5.0651	soil_type	soil_type	Root	1.13235e-06	Actinobacteriota	Acidimicrobiia	Microtrichales	Iamiaceae	Iamia
ASV667	17.0241	0.156107	4.24842e-05	5.75322	soil_type	soil_type	Root	0.000414664	Proteobacteria	Gammaproteobacteria	Burkholderiales	Comamonadaceae	Variovorax
ASV668	4.06487	5.05348	1.62963e-05	9.12975	soil_type	soil_type	Root	0.000181782	Actinobacteriota	Thermoleophilia	Solirubrobacterales	Solirubrobacteraceae	Solirubrobacter
ASV670	5.23625	0.267879	0.000873454	3.05091	soil_type	soil_type	Root	0.00326066	Verrucomicrobiota	Verrucomicrobiae	Chthoniobacterales	Chthoniobacteraceae	Candidatus Udaeobacter
ASV682	4.28219	0.486934	2.28222e-05	5.75364	soil_type	soil_type	Root	0.000243004	Actinobacteriota	Thermoleophilia	Solirubrobacterales	67-14	NA
ASV684	21.5718	0.0610335	0.0116554	2.73205	soil_type	soil_type	Root	0.0277281	Proteobacteria	Alphaproteobacteria	Sphingomonadales	Sphingomonadaceae	Novosphingobium
ASV687	3.09762	0.335854	0.00347157	2.58527	soil_type	soil_type	Root	0.0104931	Gemmatimonadota	Gemmatimonadetes	Gemmatimonadales	Gemmatimonadaceae	NA
ASV695	8.07222	-5.12973	1.33946e-09	0.058328	soil_type	soil_type	Root	1.13722e-07	Chloroflexi	Chloroflexia	Chloroflexales	Roseiflexaceae	NA
ASV702	3.65866	-0.312626	0.00111298	0.240654	soil_type	soil_type	Root	0.00399566	Proteobacteria	Alphaproteobacteria	Sphingomonadales	Sphingomonadaceae	Sphingomonas
ASV713	2.56434	-3.49194	6.02662e-05	0.163167	soil_type	soil_type	Root	0.000444641	Proteobacteria	Gammaproteobacteria	Burkholderiales	Nitrosomonadaceae	966-1
ASV717	4.41656	0.293313	0.000819511	3.65778	soil_type	soil_type	Root	0.00308315	Chloroflexi	Chloroflexia	Thermomicrobiales	JG30-KF-CM45	NA
ASV721	3.58519	0.406491	0.000240941	3.18476	soil_type	soil_type	Root	0.00122034	Actinobacteriota	Actinobacteria	Micromonosporales	Micromonosporaceae	NA
ASV725	4.29222	-2.15887	0.000202393	0.104336	soil_type	soil_type	Root	0.00104199	Proteobacteria	Gammaproteobacteria	Burkholderiales	SC-I-84	NA
ASV729	15.3934	-0.0765491	0.00578651	0.41489	soil_type	soil_type	Root	0.0160889	Proteobacteria	Alphaproteobacteria	Rhizobiales	Rhizobiaceae	NA
ASV735	2.62216	-3.73047	0.000628197	0.160146	soil_type	soil_type	Root	0.00248363	Proteobacteria	Alphaproteobacteria	Rhizobiales	Xanthobacteraceae	Bradyrhizobium
ASV736	2.82478	0.290606	0.00497795	3.60592	soil_type	soil_type	Root	0.0141773	Actinobacteriota	Thermoleophilia	Solirubrobacterales	Solirubrobacteraceae	Solirubrobacter
ASV737	10.6418	0.1275	0.0034133	2.71488	soil_type	soil_type	Root	0.0103504	Proteobacteria	Gammaproteobacteria	Xanthomonadales	Xanthomonadaceae	Pseudoxanthomonas
ASV738	2.98872	-4.89716	6.02662e-05	0.143319	soil_type	soil_type	Root	0.000444641	Actinobacteriota	Actinobacteria	Pseudonocardiales	Pseudonocardiaceae	Pseudonocardia
ASV741	3.18512	-0.2408	0.0101874	0.347161	soil_type	soil_type	Root	0.025253	Actinobacteriota	Actinobacteria	Propionibacteriales	Nocardioidaceae	Nocardioides
ASV744	2.0805	0.497063	0.00209391	2.74856	soil_type	soil_type	Root	0.00683623	Actinobacteriota	Thermoleophilia	Solirubrobacterales	67-14	NA
ASV747	3.36509	0.241001	0.00404838	4.43937	soil_type	soil_type	Root	0.0120042	Chloroflexi	Chloroflexia	Thermomicrobiales	JG30-KF-CM45	NA
ASV764	3.81234	-3.41848	8.0522e-07	0.115946	soil_type	soil_type	Root	1.79641e-05	Actinobacteriota	Actinobacteria	Propionibacteriales	Nocardioidaceae	NA
ASV767	3.71781	-0.254214	0.00262132	0.169766	soil_type	soil_type	Root	0.00832603	Proteobacteria	Alphaproteobacteria	Rhizobiales	Hyphomicrobiaceae	Hyphomicrobium
ASV776	1.86691	0.665112	0.000777435	3.21062	soil_type	soil_type	Root	0.0029591	Proteobacteria	Alphaproteobacteria	Rhizobiales	Beijerinckiaceae	NA
ASV779	3.16116	3.88971	1.62963e-05	7.32231	soil_type	soil_type	Root	0.000181782	Actinobacteriota	Actinobacteria	Propionibacteriales	Nocardioidaceae	Nocardioides
ASV780	3.37478	0.31424	0.00177833	3.83986	soil_type	soil_type	Root	0.00599388	Actinobacteriota	Rubrobacteria	Rubrobacterales	Rubrobacteriaceae	Rubrobacter
ASV783	2.88459	0.56437	0.000248464	5.61912	soil_type	soil_type	Root	0.00125167	Actinobacteriota	Actinobacteria	Pseudonocardiales	Pseudonocardiaceae	Pseudonocardia
ASV786	3.48269	-5.24292	1.35416e-07	0.125543	soil_type	soil_type	Root	4.22948e-06	Actinobacteriota	Thermoleophilia	Solirubrobacterales	Solirubrobacteraceae	Solirubrobacter
ASV795	9.47391	0.56056	7.02108e-08	15.123	soil_type	soil_type	Root	2.86033e-06	Proteobacteria	Gammaproteobacteria	Xanthomonadales	Xanthomonadaceae	Arenimonas
ASV800	3.58772	-0.384254	0.000735167	0.358557	soil_type	soil_type	Root	0.00283807	Proteobacteria	Alphaproteobacteria	Caulobacterales	Hyphomonadaceae	Hirschia
ASV817	1.59288	0.409825	0.0220476	2.03116	soil_type	soil_type	Root	0.0481552	Verrucomicrobiota	Verrucomicrobiae	Pedosphaerales	Pedosphaeraceae	NA
ASV819	1.33625	-7.51768	0.000202393	0.272294	soil_type	soil_type	Root	0.00104199	Proteobacteria	Gammaproteobacteria	Burkholderiales	Nitrosomonadaceae	MND1
ASV820	3.13747	-0.335263	0.00427231	0.167756	soil_type	soil_type	Root	0.0125126	Proteobacteria	Gammaproteobacteria	Burkholderiales	Comamonadaceae	Methylibium
ASV821	2.33675	-0.305637	0.00851516	0.29688	soil_type	soil_type	Root	0.0222248	Proteobacteria	Gammaproteobacteria	Gammaproteobacteria Incertae Sedis	Unknown Family	Acidibacter
ASV826	2.90563	-7.06359	1.70588e-08	0.146816	soil_type	soil_type	Root	8.41269e-07	Proteobacteria	Alphaproteobacteria	Defluviicoccales	Defluviicoccaceae	Defluviicoccus
ASV829	3.17841	-8.11046	1.35416e-07	0.135928	soil_type	soil_type	Root	4.22948e-06	Actinobacteriota	Thermoleophilia	Gaiellales	Gaiellaceae	Gaiella
ASV830	16.9537	4.87737	6.02662e-05	34.9073	soil_type	soil_type	Root	0.000444641	Bacteroidota	Bacteroidia	Flavobacteriales	Flavobacteriaceae	Flavobacterium
ASV832	3.51031	-0.242535	0.0130559	0.436791	soil_type	soil_type	Root	0.0306601	Actinobacteriota	Thermoleophilia	Solirubrobacterales	Solirubrobacteraceae	Solirubrobacter
ASV835	8.34547	0.165934	0.000601826	6.72034	soil_type	soil_type	Root	0.00248363	Verrucomicrobiota	Verrucomicrobiae	Verrucomicrobiales	Rubritaleaceae	Luteolibacter
ASV860	3.54525	0.354023	0.000576017	4.36887	soil_type	soil_type	Root	0.00248363	Chloroflexi	Chloroflexia	Thermomicrobiales	JG30-KF-CM45	NA
ASV862	11.296	-0.0783538	0.00911928	0.143817	soil_type	soil_type	Root	0.0232827	Proteobacteria	Gammaproteobacteria	Burkholderiales	Comamonadaceae	Comamonas
ASV863	6.85903	-0.302324	5.11379e-05	0.115651	soil_type	soil_type	Root	0.000444641	Proteobacteria	Gammaproteobacteria	Xanthomonadales	Xanthomonadaceae	NA
ASV869	1.30387	0.77772	0.00394572	3.05211	soil_type	soil_type	Root	0.011737	Gemmatimonadota	Gemmatimonadetes	Gemmatimonadales	Gemmatimonadaceae	Gemmatimonas
ASV893	16.491	0.737831	0.000202393	33.9819	soil_type	soil_type	Root	0.00104199	Proteobacteria	Gammaproteobacteria	Pseudomonadales	Pseudomonadaceae	Pseudomonas
ASV905	2.91138	2.40235	0.000628197	6.82275	soil_type	soil_type	Root	0.00248363	Chloroflexi	Chloroflexia	Thermomicrobiales	AKYG1722	NA
ASV911	8.94341	0.133505	0.00126407	6.70471	soil_type	soil_type	Root	0.00450356	Proteobacteria	Alphaproteobacteria	Rhizobiales	Rhizobiaceae	Mesorhizobium
ASV913	2.72806	-4.23619	0.000202393	0.154892	soil_type	soil_type	Root	0.00104199	Actinobacteriota	Thermoleophilia	Solirubrobacterales	Solirubrobacteraceae	Solirubrobacter
ASV919	3.45831	-3.91266	3.90954e-06	0.126316	soil_type	soil_type	Root	6.66044e-05	Actinobacteriota	Actinobacteria	Corynebacteriales	Mycobacteriaceae	Mycobacterium
ASV920	1.31631	-5.69136	0.000202393	0.275283	soil_type	soil_type	Root	0.00104199	Proteobacteria	Gammaproteobacteria	Burkholderiales	Nitrosomonadaceae	Nitrosospira
ASV933	8.39669	0.193785	0.00122002	9.23152	soil_type	soil_type	Root	0.00436321	Chloroflexi	Chloroflexia	Chloroflexales	Herpetosiphonaceae	Herpetosiphon
ASV939	2.44706	-4.00913	0.000202393	0.16966	soil_type	soil_type	Root	0.00104199	Actinobacteriota	Thermoleophilia	Solirubrobacterales	67-14	NA
ASV942	3.83884	0.247786	0.00203182	4.89766	soil_type	soil_type	Root	0.00668004	Actinobacteriota	Thermoleophilia	Gaiellales	Gaiellaceae	Gaiella
ASV948	1.15413	9.27555	0.000202393	3.30825	soil_type	soil_type	Root	0.00104199	Bacteroidota	Bacteroidia	Chitinophagales	Chitinophagaceae	Flavisolibacter
ASV957	12.5976	-0.0906797	0.0204202	0.536041	soil_type	soil_type	Root	0.044992	Proteobacteria	Gammaproteobacteria	Xanthomonadales	Xanthomonadaceae	Pseudoxanthomonas
ASV961	3.46762	5.07687	1.62963e-05	7.93525	soil_type	soil_type	Root	0.000181782	Proteobacteria	Gammaproteobacteria	Burkholderiales	Methylophilaceae	Methylobacillus
ASV964	6.77987	3.90105	0.000202393	14.5597	soil_type	soil_type	Root	0.00104199	Proteobacteria	Alphaproteobacteria	Rhizobiales	Methylopilaceae	Methylopila
ASV967	3.70022	0.29606	0.0026664	6.22763	soil_type	soil_type	Root	0.00843364	Actinobacteriota	Rubrobacteria	Rubrobacterales	Rubrobacteriaceae	Rubrobacter
ASV968	3.97438	-0.170336	0.0221504	0.394017	soil_type	soil_type	Root	0.0482674	Bacteroidota	Bacteroidia	Cytophagales	Microscillaceae	NA
ASV970	2.60709	0.655447	0.000190903	4.22625	soil_type	soil_type	Root	0.00104199	Chloroflexi	Chloroflexia	Thermomicrobiales	JG30-KF-CM45	NA
ASV971	13.4697	-2.2891	8.0522e-07	0.0357916	soil_type	soil_type	Root	1.79641e-05	Proteobacteria	Gammaproteobacteria	Burkholderiales	Oxalobacteraceae	NA
ASV981	14.3101	0.0760741	0.00668482	3.90732	soil_type	soil_type	Root	0.0179475	Proteobacteria	Alphaproteobacteria	Rhizobiales	Rhizobiaceae	Allorhizobium-Neorhizobium-Pararhizobium-Rhizobium
ASV985	2.72697	-0.693959	0.000122205	0.191748	soil_type	soil_type	Root	0.000835809	Bacteroidota	Bacteroidia	Chitinophagales	Saprospiraceae	NA
ASV993	1.98481	4.26009	0.000202393	4.96962	soil_type	soil_type	Root	0.00104199	Bacteroidota	Bacteroidia	Cytophagales	Microscillaceae	NA
ASV996	3.16278	3.59899	6.02662e-05	7.32556	soil_type	soil_type	Root	0.000444641	Proteobacteria	Gammaproteobacteria	Burkholderiales	Methylophilaceae	Methylotenera
ASV1000	3.45437	2.51906	0.000628197	7.90875	soil_type	soil_type	Root	0.00248363	Proteobacteria	Gammaproteobacteria	Xanthomonadales	Xanthomonadaceae	NA
ASV1002	2.57284	-5.26009	8.0522e-07	0.162716	soil_type	soil_type	Root	1.79641e-05	Proteobacteria	Alphaproteobacteria	Rhodobacterales	Rhodobacteraceae	Oceanicella
ASV1004	4.58162	0.563114	2.57105e-06	4.89732	soil_type	soil_type	Root	5.23711e-05	Actinobacteriota	Actinobacteria	Micrococcales	Intrasporangiaceae	Pedococcus-Phycicoccus
ASV1009	2.11672	-0.261849	0.0226785	0.391373	soil_type	soil_type	Root	0.0490285	Chloroflexi	Chloroflexia	Thermomicrobiales	JG30-KF-CM45	NA
ASV1010	6.7565	-0.202809	0.000882793	0.312256	soil_type	soil_type	Root	0.00328245	Proteobacteria	Gammaproteobacteria	Xanthomonadales	Rhodanobacteraceae	Dokdonella
ASV1011	3.19547	0.70222	1.10134e-05	4.3717	soil_type	soil_type	Root	0.000147422	Chloroflexi	Chloroflexia	Thermomicrobiales	JG30-KF-CM45	NA
ASV1012	3.04703	0.421353	0.00153223	2.55081	soil_type	soil_type	Root	0.00531414	Proteobacteria	Gammaproteobacteria	Xanthomonadales	Xanthomonadaceae	Lysobacter
ASV1015	2.15481	0.887284	5.25113e-05	4.29275	soil_type	soil_type	Root	0.000444641	Bacteroidota	Bacteroidia	Chitinophagales	Chitinophagaceae	Parasegetibacter
ASV1027	2.03469	9.82198	0.000202393	5.06937	soil_type	soil_type	Root	0.00104199	Methylomirabilota	Methylomirabilia	Rokubacteriales	WX65	NA
ASV1034	11.7913	-0.59648	0.00154263	0.047808	soil_type	soil_type	Root	0.00531414	Proteobacteria	Gammaproteobacteria	Pseudomonadales	Pseudomonadaceae	Pseudomonas
ASV1037	2.85375	3.80171	0.000202393	6.7075	soil_type	soil_type	Root	0.00104199	Actinobacteriota	Actinobacteria	Propionibacteriales	Nocardioidaceae	Aeromicrobium
ASV1038	3.09881	8.56974	1.70588e-08	7.19762	soil_type	soil_type	Root	8.41269e-07	Chloroflexi	Chloroflexia	Thermomicrobiales	JG30-KF-CM45	NA
ASV1039	1.9045	5.01842	0.000628197	4.809	soil_type	soil_type	Root	0.00248363	Bacteroidota	Bacteroidia	Chitinophagales	Chitinophagaceae	Parafilimonas
ASV1042	5.04887	-2.65308	0.000202393	0.0901084	soil_type	soil_type	Root	0.00104199	Actinobacteriota	Actinobacteria	Propionibacteriales	Nocardioidaceae	Aeromicrobium
ASV1049	1.18266	9.61707	6.02662e-05	3.36531	soil_type	soil_type	Root	0.000444641	Verrucomicrobiota	Verrucomicrobiae	Pedosphaerales	Pedosphaeraceae	NA
ASV1058	2.63144	-0.281029	0.0100662	0.247716	soil_type	soil_type	Root	0.0250187	Actinobacteriota	Actinobacteria	Micromonosporales	Micromonosporaceae	Virgisporangium
ASV1065	2.25009	-0.434448	0.0026822	0.349111	soil_type	soil_type	Root	0.00843364	Proteobacteria	Alphaproteobacteria	Defluviicoccales	Defluviicoccaceae	Defluviicoccus
ASV1095	3.07025	-0.480953	0.000404092	0.36504	soil_type	soil_type	Root	0.001922	Proteobacteria	Gammaproteobacteria	Xanthomonadales	Rhodanobacteraceae	Dokdonella
ASV1102	3.88212	4.14469	0.000202393	8.76425	soil_type	soil_type	Root	0.00104199	Proteobacteria	Gammaproteobacteria	Burkholderiales	Methylophilaceae	Methylotenera
ASV1103	2.33966	-0.375025	0.00452327	0.321099	soil_type	soil_type	Root	0.0130409	Chloroflexi	Chloroflexia	Thermomicrobiales	JG30-KF-CM45	NA
ASV1113	1.96653	4.02883	6.02662e-05	4.93306	soil_type	soil_type	Root	0.000444641	Actinobacteriota	Actinobacteria	Pseudonocardiales	Pseudonocardiaceae	Pseudonocardia
ASV1120	2.97959	0.624975	3.76807e-05	5.41417	soil_type	soil_type	Root	0.000375605	Chloroflexi	Chloroflexia	Thermomicrobiales	JG30-KF-CM45	NA
ASV1125	2.97725	-5.57357	1.35416e-07	0.143792	soil_type	soil_type	Root	4.22948e-06	Chloroflexi	Chloroflexia	Thermomicrobiales	JG30-KF-CM45	NA
ASV1131	3.84094	0.216762	0.0116592	2.68071	soil_type	soil_type	Root	0.0277281	Proteobacteria	Alphaproteobacteria	Rhizobiales	Xanthobacteraceae	Xanthobacter
ASV1133	2.43509	0.381369	0.00179474	3.63458	soil_type	soil_type	Root	0.00600598	Acidobacteriota	Vicinamibacteria	Vicinamibacterales	Vicinamibacteraceae	NA
ASV1148	11.0936	-0.141109	0.00296913	0.0948426	soil_type	soil_type	Root	0.00918177	Proteobacteria	Gammaproteobacteria	Burkholderiales	Oxalobacteraceae	Herminiimonas
ASV1150	4.62266	6.63554	3.90954e-06	10.2453	soil_type	soil_type	Root	6.66044e-05	Chloroflexi	Chloroflexia	Chloroflexales	Roseiflexaceae	NA
ASV1151	10.7916	-4.60146	0.000202393	0.0442807	soil_type	soil_type	Root	0.00104199	Proteobacteria	Gammaproteobacteria	Burkholderiales	Oxalobacteraceae	Herminiimonas
ASV1158	1.39062	8.35459	0.000628197	3.78125	soil_type	soil_type	Root	0.00248363	Gemmatimonadota	Gemmatimonadetes	Gemmatimonadales	Gemmatimonadaceae	NA
ASV1160	0.930438	-0.657093	0.0109706	0.431014	soil_type	soil_type	Root	0.0266998	Proteobacteria	Alphaproteobacteria	Caulobacterales	Hyphomonadaceae	SWB02
ASV1165	10.3254	0.147664	0.00361079	5.46968	soil_type	soil_type	Root	0.0108093	Firmicutes	Clostridia	Lachnospirales	Lachnospiraceae	Lachnoclostridium
ASV1168	5.88091	2.25573	0.000628197	12.7618	soil_type	soil_type	Root	0.00248363	Proteobacteria	Alphaproteobacteria	Rhizobiales	Hyphomicrobiaceae	Hyphomicrobium
ASV1179	3.19781	4.48844	3.90954e-06	7.39562	soil_type	soil_type	Root	6.66044e-05	Actinobacteriota	Actinobacteria	Propionibacteriales	Nocardioidaceae	Nocardioides
ASV1180	8.28759	-0.0936729	0.00638783	0.255446	soil_type	soil_type	Root	0.0172768	Proteobacteria	Alphaproteobacteria	Rhizobiales	Devosiaceae	Devosia
ASV1191	0.992281	12.4155	0.000628197	2.98456	soil_type	soil_type	Root	0.00248363	Proteobacteria	Gammaproteobacteria	Nitrosococcales	Nitrosococcaceae	SZB85
ASV1196	10.5476	-0.0804478	0.0124927	0.346953	soil_type	soil_type	Root	0.0296346	Proteobacteria	Gammaproteobacteria	Burkholderiales	Comamonadaceae	Variovorax
ASV1197	1.10897	0.884106	0.00737456	2.75909	soil_type	soil_type	Root	0.0196306	Proteobacteria	Gammaproteobacteria	Burkholderiales	Comamonadaceae	Ramlibacter
ASV1199	3.51713	-0.438115	0.000670417	0.200904	soil_type	soil_type	Root	0.00263942	Bacteroidota	Bacteroidia	Flavobacteriales	Flavobacteriaceae	Flavobacterium
ASV1211	2.13791	-0.418263	0.00769014	0.381007	soil_type	soil_type	Root	0.0202406	Actinobacteriota	Actinobacteria	Propionibacteriales	Nocardioidaceae	Nocardioides
ASV1230	5.14803	2.01969	0.000628197	11.2961	soil_type	soil_type	Root	0.00248363	Proteobacteria	Alphaproteobacteria	Rhizobiales	Beijerinckiaceae	Methylobacterium-Methylorubrum
ASV1237	2.53681	-3.27185	1.62963e-05	0.164646	soil_type	soil_type	Root	0.000181782	Actinobacteriota	Actinobacteria	Propionibacteriales	Nocardioidaceae	Nocardioides
ASV1241	9.81513	-0.619291	1.93434e-05	0.0596246	soil_type	soil_type	Root	0.000213233	Proteobacteria	Gammaproteobacteria	Pseudomonadales	Pseudomonadaceae	Pseudomonas
ASV1243	3.09956	0.211555	0.0135274	4.10054	soil_type	soil_type	Root	0.0315302	Proteobacteria	Alphaproteobacteria	Dongiales	Dongiaceae	Dongia
ASV1248	3.50428	0.273137	0.00174388	4.50309	soil_type	soil_type	Root	0.00592034	Chloroflexi	Chloroflexia	Thermomicrobiales	JG30-KF-CM45	NA
ASV1253	9.23153	0.249355	6.32065e-05	3.18869	soil_type	soil_type	Root	0.000462691	Bacteroidota	Bacteroidia	Cytophagales	Spirosomaceae	Dyadobacter
ASV1254	1.514	0.55652	0.00348836	2.74403	soil_type	soil_type	Root	0.01051	Actinobacteriota	Actinobacteria	Propionibacteriales	Nocardioidaceae	Nocardioides
ASV1258	5.20659	-2.54309	6.02662e-05	0.0876179	soil_type	soil_type	Root	0.000444641	Bacteroidota	Bacteroidia	Flavobacteriales	Flavobacteriaceae	Flavobacterium
ASV1264	2.02166	-0.275566	0.0190556	0.350612	soil_type	soil_type	Root	0.0424113	Actinobacteriota	Actinobacteria	Streptomycetales	Streptomycetaceae	Streptomyces
ASV1269	8.95303	0.230481	0.00019459	2.85506	soil_type	soil_type	Root	0.00104199	Bacteroidota	Bacteroidia	Cytophagales	Spirosomaceae	Dyadobacter
ASV1279	2.57366	3.66727	0.000628197	6.14731	soil_type	soil_type	Root	0.00248363	Proteobacteria	Alphaproteobacteria	Rhizobiales	Rhizobiaceae	Phyllobacterium
ASV1283	9.12131	-0.0600139	0.0228156	0.15536	soil_type	soil_type	Root	0.0491454	Proteobacteria	Gammaproteobacteria	Pseudomonadales	Pseudomonadaceae	Pseudomonas
ASV1287	1.82228	-3.17443	0.000628197	0.215306	soil_type	soil_type	Root	0.00248363	Actinobacteriota	Actinobacteria	Pseudonocardiales	Pseudonocardiaceae	Pseudonocardia
ASV1291	9.26025	0.266036	4.39504e-06	12.0964	soil_type	soil_type	Root	7.31435e-05	Actinobacteriota	Actinobacteria	Micrococcales	Microbacteriaceae	Microbacterium
ASV1298	1.26272	-7.65309	0.000628197	0.283653	soil_type	soil_type	Root	0.00248363	Proteobacteria	Alphaproteobacteria	Rhizobiales	Hyphomicrobiaceae	Pedomicrobium
ASV1299	1.32031	0.654097	0.00571825	2.26331	soil_type	soil_type	Root	0.0160419	Bacteroidota	Bacteroidia	Chitinophagales	Chitinophagaceae	Aurantisolimonas
ASV1311	9.39059	-6.67307	6.02662e-05	0.0505531	soil_type	soil_type	Root	0.000444641	Bacteroidota	Bacteroidia	Flavobacteriales	Flavobacteriaceae	Flavobacterium
ASV1313	1.23591	-0.854059	0.00129426	0.366534	soil_type	soil_type	Root	0.0045763	Acidobacteriota	Blastocatellia	Pyrinomonadales	Pyrinomonadaceae	RB41
ASV1321	6.86538	0.270976	0.000238573	7.7955	soil_type	soil_type	Root	0.0012149	Proteobacteria	Gammaproteobacteria	Xanthomonadales	Xanthomonadaceae	Luteimonas
ASV1325	8.42825	-1.51151	0.000628197	0.056002	soil_type	soil_type	Root	0.00248363	Bacteroidota	Bacteroidia	Flavobacteriales	Weeksellaceae	Chryseobacterium
ASV1335	5.32256	-0.20334	0.00596086	0.419535	soil_type	soil_type	Root	0.0165246	Chloroflexi	Chloroflexia	Chloroflexales	Roseiflexaceae	NA
ASV1347	1.00113	-0.515849	0.0202947	0.454273	soil_type	soil_type	Root	0.0448494	Actinobacteriota	Actinobacteria	Streptomycetales	Streptomycetaceae	Streptomyces
ASV1348	0.789812	0.783954	0.010767	2.01284	soil_type	soil_type	Root	0.0264101	Proteobacteria	Alphaproteobacteria	Caulobacterales	Hyphomonadaceae	SWB02
ASV1351	4.04931	0.419007	0.00442147	5.11158	soil_type	soil_type	Root	0.0128264	Chloroflexi	Chloroflexia	Chloroflexales	Herpetosiphonaceae	Herpetosiphon
ASV1364	1.8415	-0.313005	0.0184768	0.292546	soil_type	soil_type	Root	0.0414182	Proteobacteria	Gammaproteobacteria	Burkholderiales	Comamonadaceae	Methylibium
ASV1368	2.25541	4.55531	0.000202393	5.51081	soil_type	soil_type	Root	0.00104199	Actinobacteriota	Actinobacteria	Micrococcales	Microbacteriaceae	Microbacterium
ASV1369	4.28125	0.698944	6.69487e-07	5.66588	soil_type	soil_type	Root	1.75812e-05	Proteobacteria	Gammaproteobacteria	Xanthomonadales	Xanthomonadaceae	Lysobacter
ASV1371	4.31253	0.333867	0.00041932	7.79331	soil_type	soil_type	Root	0.00198436	Verrucomicrobiota	Verrucomicrobiae	Verrucomicrobiales	Rubritaleaceae	Luteolibacter
ASV1381	2.37138	-5.11035	3.90954e-06	0.174133	soil_type	soil_type	Root	6.66044e-05	Actinobacteriota	Acidimicrobiia	Microtrichales	Iamiaceae	Iamia
ASV1384	2.15712	-0.386526	0.00531958	0.264462	soil_type	soil_type	Root	0.0150134	Actinobacteriota	Actinobacteria	Propionibacteriales	Nocardioidaceae	Nocardioides
ASV1387	7.76006	0.160262	0.00201365	2.77996	soil_type	soil_type	Root	0.00664362	Actinobacteriota	Actinobacteria	Micrococcales	Microbacteriaceae	Microbacterium
ASV1390	1.781	-0.369535	0.0102982	0.297203	soil_type	soil_type	Root	0.0254602	Proteobacteria	Alphaproteobacteria	Tistrellales	Geminicoccaceae	Candidatus Alysiosphaera
ASV1406	1.51497	1.47179	2.0493e-05	3.59959	soil_type	soil_type	Root	0.000223278	Chloroflexi	Chloroflexia	Chloroflexales	Roseiflexaceae	NA
ASV1412	2.06787	-0.369656	0.00530319	0.273902	soil_type	soil_type	Root	0.0150123	Actinobacteriota	Actinobacteria	Micromonosporales	Micromonosporaceae	NA
ASV1414	5.18762	-0.211376	0.00754395	0.383231	soil_type	soil_type	Root	0.019968	Proteobacteria	Gammaproteobacteria	Xanthomonadales	Xanthomonadaceae	Thermomonas
ASV1426	2.33403	-0.417307	0.00428659	0.392752	soil_type	soil_type	Root	0.0125126	Actinobacteriota	Actinobacteria	Micromonosporales	Micromonosporaceae	NA
ASV1440	2.31216	-6.54034	1.62963e-05	0.1778	soil_type	soil_type	Root	0.000181782	Gemmatimonadota	Gemmatimonadetes	Gemmatimonadales	Gemmatimonadaceae	Gemmatimonas
ASV1441	1.71812	-0.466013	0.00350741	0.297783	soil_type	soil_type	Root	0.0105335	Acidobacteriota	Vicinamibacteria	Vicinamibacterales	Vicinamibacteraceae	NA
ASV1445	1.05206	6.14051	0.000628197	3.10412	soil_type	soil_type	Root	0.00248363	Acidobacteriota	Vicinamibacteria	Vicinamibacterales	Vicinamibacteraceae	NA
ASV1446	1.07166	-0.634017	0.00982444	0.391599	soil_type	soil_type	Root	0.0245999	Gemmatimonadota	Gemmatimonadetes	Gemmatimonadales	Gemmatimonadaceae	NA
ASV1451	0.708437	0.919959	0.00903874	2.07896	soil_type	soil_type	Root	0.0231522	Gemmatimonadota	Gemmatimonadetes	Gemmatimonadales	Gemmatimonadaceae	Roseisolibacter
ASV1468	5.68138	0.665469	4.64405e-05	9.77153	soil_type	soil_type	Root	0.000444641	Actinobacteriota	Actinobacteria	Corynebacteriales	Nocardiaceae	Williamsia
ASV1481	4.42737	-0.250777	0.000717186	0.221892	soil_type	soil_type	Root	0.00280001	Proteobacteria	Alphaproteobacteria	Sphingomonadales	Sphingomonadaceae	Altererythrobacter
ASV1486	2.89403	0.236659	0.00899566	4.25577	soil_type	soil_type	Root	0.0231522	Proteobacteria	Gammaproteobacteria	Pseudomonadales	Moraxellaceae	Acinetobacter
ASV1488	6.34866	0.197102	0.00448044	3.04008	soil_type	soil_type	Root	0.0129573	Verrucomicrobiota	Verrucomicrobiae	Verrucomicrobiales	Rubritaleaceae	Luteolibacter
ASV1503	6.18675	0.0935226	0.0145201	5.38911	soil_type	soil_type	Root	0.0334284	Actinobacteriota	Actinobacteria	Micrococcales	Micrococcaceae	Pseudarthrobacter
ASV1521	1.67794	-0.698222	0.000565708	0.29209	soil_type	soil_type	Root	0.00248363	Proteobacteria	Gammaproteobacteria	Xanthomonadales	Rhodanobacteraceae	NA
ASV1527	1.30441	8.97406	0.000202393	3.60881	soil_type	soil_type	Root	0.00104199	Actinobacteriota	Acidimicrobiia	Microtrichales	Ilumatobacteraceae	NA
ASV1531	2.63047	-3.43866	0.000628197	0.15972	soil_type	soil_type	Root	0.00248363	Proteobacteria	Alphaproteobacteria	Reyranellales	Reyranellaceae	NA
ASV1533	7.98175	2.66881	8.0522e-07	16.9635	soil_type	soil_type	Root	1.79641e-05	Actinobacteriota	Actinobacteria	Micrococcales	Microbacteriaceae	NA
ASV1538	4.02997	0.346946	0.00211193	2.39769	soil_type	soil_type	Root	0.00687111	Actinobacteriota	Actinobacteria	Propionibacteriales	Nocardioidaceae	Nocardioides
ASV1539	3.77116	0.253442	0.00145591	4.52817	soil_type	soil_type	Root	0.00507133	Actinobacteriota	Actinobacteria	Micrococcales	Microbacteriaceae	Microbacterium
ASV1550	1.43991	-0.445724	0.0114656	0.339527	soil_type	soil_type	Root	0.0275468	Proteobacteria	Alphaproteobacteria	Caulobacterales	Caulobacteraceae	Caulobacter
ASV1564	1.42663	-2.05526	0.000562593	0.272108	soil_type	soil_type	Root	0.00248363	Proteobacteria	Alphaproteobacteria	Rhizobiales	Beijerinckiaceae	Microvirga
ASV1566	2.24009	-0.278818	0.0140981	0.334384	soil_type	soil_type	Root	0.0326365	Firmicutes	Bacilli	Bacillales	Bacillaceae	Bacillus
ASV1573	1.36631	-4.2633	0.000628197	0.267908	soil_type	soil_type	Root	0.00248363	Actinobacteriota	Actinobacteria	Propionibacteriales	Nocardioidaceae	Nocardioides
ASV1574	3.14703	2.38937	0.000202393	7.29406	soil_type	soil_type	Root	0.00104199	Proteobacteria	Alphaproteobacteria	Sphingomonadales	Sphingomonadaceae	Sphingomonas
ASV1588	7.18716	-8.98757	0.000202393	0.0650436	soil_type	soil_type	Root	0.00104199	Proteobacteria	Gammaproteobacteria	Burkholderiales	Oxalobacteraceae	NA
ASV1604	7.15478	-2.92496	0.000202393	0.0653187	soil_type	soil_type	Root	0.00104199	Bacteroidota	Bacteroidia	Flavobacteriales	Flavobacteriaceae	Flavobacterium
ASV1619	1.82681	-5.95874	6.02662e-05	0.214886	soil_type	soil_type	Root	0.000444641	Chloroflexi	Chloroflexia	Thermomicrobiales	JG30-KF-CM45	NA
ASV1643	1.03344	0.656448	0.0141065	1.99241	soil_type	soil_type	Root	0.0326365	Myxococcota	Myxococcia	Myxococcales	Vulgatibacteraceae	Vulgatibacter
ASV1646	1.23616	7.78177	0.000202393	3.47231	soil_type	soil_type	Root	0.00104199	Gemmatimonadota	Gemmatimonadetes	Gemmatimonadales	Gemmatimonadaceae	Gemmatimonas
ASV1657	3.01384	3.01307	0.000628197	7.02769	soil_type	soil_type	Root	0.00248363	Actinobacteriota	Actinobacteria	Micromonosporales	Micromonosporaceae	Actinoplanes
ASV1678	4.49484	-1.55908	0.000202393	0.100103	soil_type	soil_type	Root	0.00104199	Proteobacteria	Alphaproteobacteria	Rhizobiales	Rhizobiaceae	NA
ASV1685	4.45809	0.43109	0.00102381	7.24096	soil_type	soil_type	Root	0.0037039	Actinobacteriota	Actinobacteria	Micrococcales	Intrasporangiaceae	Pedococcus-Phycicoccus
ASV1687	5.32347	0.379262	0.00258017	8.02024	soil_type	soil_type	Root	0.0082232	Proteobacteria	Gammaproteobacteria	Burkholderiales	Comamonadaceae	NA
ASV1689	0.767687	-0.984634	0.00639477	0.512258	soil_type	soil_type	Root	0.0172768	Proteobacteria	Gammaproteobacteria	Steroidobacterales	Woeseiaceae	Woeseia
ASV1690	6.12059	-0.237901	0.000217186	0.21676	soil_type	soil_type	Root	0.00111204	Proteobacteria	Alphaproteobacteria	Rhizobiales	Rhizobiaceae	Neorhizobium
ASV1714	3.20431	-0.258082	0.00423184	0.256249	soil_type	soil_type	Root	0.0124693	Bacteroidota	Bacteroidia	Cytophagales	Microscillaceae	Chryseolinea
ASV1737	6.43009	0.184169	0.000680116	6.32345	soil_type	soil_type	Root	0.0026664	Actinobacteriota	Actinobacteria	Micrococcales	Microbacteriaceae	NA
ASV1754	3.15403	0.434068	0.000945795	5.38591	soil_type	soil_type	Root	0.00347533	Proteobacteria	Alphaproteobacteria	Rhizobiales	Beijerinckiaceae	NA
ASV1761	1.43553	4.42001	0.000628197	3.87106	soil_type	soil_type	Root	0.00248363	Proteobacteria	Alphaproteobacteria	Rhodobacterales	Rhodobacteraceae	Amaricoccus
ASV1775	6.68813	0.427925	0.00317155	11.5784	soil_type	soil_type	Root	0.00971158	Proteobacteria	Gammaproteobacteria	Burkholderiales	Comamonadaceae	Hydrogenophaga
ASV1779	4.07834	-2.68225	0.000202393	0.10921	soil_type	soil_type	Root	0.00104199	Bacteroidota	Bacteroidia	Flavobacteriales	Flavobacteriaceae	Flavobacterium
ASV1784	5.02859	-0.137771	0.0202538	0.291957	soil_type	soil_type	Root	0.0448494	Proteobacteria	Gammaproteobacteria	Burkholderiales	Rhodocyclaceae	NA
ASV1789	1.58409	-0.617119	0.00153819	0.332007	soil_type	soil_type	Root	0.00531414	Firmicutes	Bacilli	Bacillales	Planococcaceae	NA
ASV1800	4.43009	0.215261	0.00156662	5.67498	soil_type	soil_type	Root	0.00535739	Actinobacteriota	Actinobacteria	Propionibacteriales	Nocardioidaceae	Aeromicrobium
ASV1803	1.84781	-0.828328	0.000374812	0.272232	soil_type	soil_type	Root	0.0018103	Proteobacteria	Alphaproteobacteria	Rhizobiales	Xanthobacteraceae	Pseudolabrys
ASV1807	1.50181	6.89364	0.000628197	4.00362	soil_type	soil_type	Root	0.00248363	Actinobacteriota	Actinobacteria	Micromonosporales	Micromonosporaceae	Actinoplanes
ASV1835	1.62366	0.483834	0.00458346	2.96847	soil_type	soil_type	Root	0.0131739	Chloroflexi	Chloroflexia	Thermomicrobiales	JG30-KF-CM45	NA
ASV1857	3.76625	0.249934	0.00295063	4.64659	soil_type	soil_type	Root	0.00915477	Proteobacteria	Gammaproteobacteria	Xanthomonadales	Xanthomonadaceae	Thermomonas
ASV1867	1.38381	8.48686	0.000628197	3.76762	soil_type	soil_type	Root	0.00248363	Proteobacteria	Gammaproteobacteria	Burkholderiales	Rhodocyclaceae	NA
ASV1924	1.86281	-0.391524	0.00625796	0.301852	soil_type	soil_type	Root	0.0171529	Proteobacteria	Alphaproteobacteria	Rhizobiales	Xanthobacteraceae	Afipia
ASV1947	5.185	-0.218018	0.00242337	0.252603	soil_type	soil_type	Root	0.00777635	Proteobacteria	Alphaproteobacteria	Sphingomonadales	Sphingomonadaceae	Sphingobium
ASV1948	2.98431	-0.233402	0.00725257	0.212661	soil_type	soil_type	Root	0.019379	Proteobacteria	Alphaproteobacteria	Rhizobiales	Rhizobiaceae	Allorhizobium-Neorhizobium-Pararhizobium-Rhizobium
ASV1955	5.10025	-0.350856	0.000250897	0.120764	soil_type	soil_type	Root	0.00125717	Proteobacteria	Alphaproteobacteria	Rhizobiales	Rhizobiaceae	NA
ASV1960	1.95059	-0.371073	0.0140059	0.424118	soil_type	soil_type	Root	0.0325647	Actinobacteriota	Actinobacteria	Micrococcales	Microbacteriaceae	Microbacterium
ASV1965	4.84175	-0.427189	0.00283453	0.115903	soil_type	soil_type	Root	0.00882377	Proteobacteria	Gammaproteobacteria	Pseudomonadales	Pseudomonadaceae	Pseudomonas
ASV1979	1.54638	-6.81026	0.000202393	0.244334	soil_type	soil_type	Root	0.00104199	Chloroflexi	Chloroflexia	Thermomicrobiales	JG30-KF-CM45	NA
ASV1990	2.04781	-0.547041	0.00578151	0.520746	soil_type	soil_type	Root	0.0160889	Actinobacteriota	Thermoleophilia	Solirubrobacterales	Solirubrobacteraceae	Solirubrobacter
ASV1996	3.26684	0.336268	0.00073602	4.92952	soil_type	soil_type	Root	0.00283807	Actinobacteriota	Actinobacteria	Propionibacteriales	Nocardioidaceae	Nocardioides
ASV2024	1.58013	4.32474	0.000628197	4.16025	soil_type	soil_type	Root	0.00248363	Actinobacteriota	Actinobacteria	Micrococcales	Microbacteriaceae	Agromyces
ASV2047	0.700406	-1.01796	0.0116594	0.520383	soil_type	soil_type	Root	0.0277281	Proteobacteria	Gammaproteobacteria	Pseudomonadales	KI89A clade	NA
ASV2083	1.02584	0.895116	0.00222045	2.20402	soil_type	soil_type	Root	0.00714968	Chloroflexi	Chloroflexia	Chloroflexales	Roseiflexaceae	NA
ASV2113	1.27334	5.46554	0.000202393	3.54669	soil_type	soil_type	Root	0.00104199	Actinobacteriota	Actinobacteria	Propionibacteriales	Nocardioidaceae	Nocardioides
ASV2119	4.60478	0.38846	0.000345137	3.24123	soil_type	soil_type	Root	0.00169316	Bacteroidota	Bacteroidia	Sphingobacteriales	Sphingobacteriaceae	Mucilaginibacter
ASV2132	1.1635	-30.5576	6.02662e-05	0.300571	soil_type	soil_type	Root	0.000444641	Actinobacteriota	Thermoleophilia	Solirubrobacterales	Solirubrobacteraceae	Solirubrobacter
ASV2145	0.612938	0.92619	0.0181085	1.78633	soil_type	soil_type	Root	0.0406899	Entotheonellaeota	Entotheonellia	Entotheonellales	Entotheonellaceae	NA
ASV2154	4.04125	-0.322698	0.000725852	0.220494	soil_type	soil_type	Root	0.00282209	Actinobacteriota	Actinobacteria	Micrococcales	Microbacteriaceae	Lysinimonas
ASV2155	1.93241	-28.8631	6.02662e-05	0.205558	soil_type	soil_type	Root	0.000444641	Actinobacteriota	Actinobacteria	Propionibacteriales	Nocardioidaceae	Nocardioides
ASV2184	1.04656	-16.6964	6.02662e-05	0.323298	soil_type	soil_type	Root	0.000444641	Chloroflexi	Chloroflexia	Chloroflexales	Roseiflexaceae	NA
ASV2220	0.703187	-1.0987	0.00779583	0.466961	soil_type	soil_type	Root	0.0204613	Myxococcota	Myxococcia	Myxococcales	Myxococcaceae	P3OB-42
ASV2224	4.28353	2.96629	6.02662e-05	9.56706	soil_type	soil_type	Root	0.000444641	Proteobacteria	Alphaproteobacteria	Sphingomonadales	Sphingomonadaceae	Novosphingobium
ASV2230	3.49688	-0.601412	0.00157423	0.173956	soil_type	soil_type	Root	0.00536383	Bacteroidota	Bacteroidia	Chitinophagales	Chitinophagaceae	Chitinophaga
ASV2245	2.82881	6.1873	1.62963e-05	6.65763	soil_type	soil_type	Root	0.000181782	Proteobacteria	Gammaproteobacteria	Burkholderiales	Comamonadaceae	Rhizobacter
ASV2250	3.12491	-0.534917	8.938e-05	0.210671	soil_type	soil_type	Root	0.000634463	Proteobacteria	Alphaproteobacteria	Rhizobiales	Rhizobiaceae	Shinella
ASV2271	2.15194	0.544571	0.00127075	3.35934	soil_type	soil_type	Root	0.0045102	Actinobacteriota	Actinobacteria	Micrococcales	Microbacteriaceae	Agromyces
ASV2286	4.2395	0.297816	0.00205569	6.16666	soil_type	soil_type	Root	0.00673489	Proteobacteria	Gammaproteobacteria	Burkholderiales	Comamonadaceae	Variovorax
ASV2322	2.43597	0.27901	0.010766	3.38296	soil_type	soil_type	Root	0.0264101	Proteobacteria	Gammaproteobacteria	Xanthomonadales	Xanthomonadaceae	Stenotrophomonas
ASV2324	1.03137	-9.4374	0.000628197	0.326504	soil_type	soil_type	Root	0.00248363	Bacteroidota	Bacteroidia	Chitinophagales	Saprospiraceae	NA
ASV2341	3.51922	-0.471034	0.000371979	0.187491	soil_type	soil_type	Root	0.0018103	Patescibacteria	Saccharimonadia	Saccharimonadales	Saccharimonadaceae	TM7a
ASV2345	2.07669	5.99248	0.000628197	5.15337	soil_type	soil_type	Root	0.00248363	Proteobacteria	Alphaproteobacteria	Rhizobiales	Hyphomicrobiaceae	Hyphomicrobium
ASV2352	3.33562	0.208921	0.0156861	2.51285	soil_type	soil_type	Root	0.0357613	Actinobacteriota	Actinobacteria	Micrococcales	Microbacteriaceae	Salinibacterium
ASV2407	3.415	0.296313	0.00100925	4.62936	soil_type	soil_type	Root	0.00367963	Proteobacteria	Gammaproteobacteria	Xanthomonadales	Xanthomonadaceae	Pseudoxanthomonas
ASV2464	1.27609	0.474196	0.0146544	2.30213	soil_type	soil_type	Root	0.0336548	Actinobacteriota	Actinobacteria	Micrococcales	Microbacteriaceae	NA
ASV2483	0.678844	-1.05617	0.00747472	0.504172	soil_type	soil_type	Root	0.0198408	Actinobacteriota	Actinobacteria	Corynebacteriales	Nocardiaceae	Nocardia
ASV2527	0.936	-26.8493	0.000202393	0.348189	soil_type	soil_type	Root	0.00104199	Chloroflexi	Chloroflexia	Thermomicrobiales	JG30-KF-CM45	NA
ASV2562	1.756	3.6916	0.000628197	4.512	soil_type	soil_type	Root	0.00248363	Acidobacteriota	Blastocatellia	Pyrinomonadales	Pyrinomonadaceae	RB41
ASV2566	2.51625	-7.05775	1.62963e-05	0.165769	soil_type	soil_type	Root	0.000181782	Proteobacteria	Alphaproteobacteria	Rhizobiales	Devosiaceae	Devosia
ASV2592	1.41803	-0.481991	0.0108356	0.428279	soil_type	soil_type	Root	0.026509	Patescibacteria	Saccharimonadia	Saccharimonadales	LWQ8	NA
ASV2640	1.03431	-0.569288	0.0131782	0.418041	soil_type	soil_type	Root	0.0308699	Proteobacteria	Gammaproteobacteria	Gammaproteobacteria Incertae Sedis	Unknown Family	Acidibacter
ASV2662	1.344	-0.46606	0.0198816	0.38824	soil_type	soil_type	Root	0.0441448	Bacteroidota	Bacteroidia	Chitinophagales	Chitinophagaceae	Aurantisolimonas
ASV2671	2.17634	-16.1785	1.62963e-05	0.186822	soil_type	soil_type	Root	0.000181782	Actinobacteriota	Actinobacteria	Micrococcales	Intrasporangiaceae	Intrasporangium
ASV2729	1.39888	-15.3899	6.02662e-05	0.263314	soil_type	soil_type	Root	0.000444641	Bacteroidota	Bacteroidia	Chitinophagales	Saprospiraceae	NA
ASV2758	1.20388	-3.39571	6.03715e-06	0.310514	soil_type	soil_type	Root	9.42802e-05	Proteobacteria	Alphaproteobacteria	Rhizobiales	Hyphomicrobiaceae	Hyphomicrobium
ASV2795	1.37081	-9.61187	0.000628197	0.267264	soil_type	soil_type	Root	0.00248363	Chloroflexi	Chloroflexia	Thermomicrobiales	JG30-KF-CM45	NA
ASV2818	3.02431	4.15445	0.000628197	7.04863	soil_type	soil_type	Root	0.00248363	Proteobacteria	Gammaproteobacteria	Burkholderiales	Comamonadaceae	Pseudorhodoferax
ASV2830	2.94866	0.460094	0.0107141	5.51997	soil_type	soil_type	Root	0.0264101	Proteobacteria	Gammaproteobacteria	Xanthomonadales	Rhodanobacteraceae	Dyella
ASV2834	3.09978	0.352047	0.0048871	2.2906	soil_type	soil_type	Root	0.013961	Proteobacteria	Alphaproteobacteria	Rhizobiales	Rhizobiaceae	Mesorhizobium
ASV2878	0.618094	14.8503	0.000202393	2.23619	soil_type	soil_type	Root	0.00104199	Methylomirabilota	Methylomirabilia	Rokubacteriales	WX65	NA
ASV2884	2.18878	-5.32864	6.02662e-05	0.185958	soil_type	soil_type	Root	0.000444641	Proteobacteria	Alphaproteobacteria	Sphingomonadales	Sphingomonadaceae	Porphyrobacter
ASV2905	2.74897	-7.10306	6.02662e-05	0.153895	soil_type	soil_type	Root	0.000444641	Proteobacteria	Gammaproteobacteria	Xanthomonadales	Rhodanobacteraceae	Luteibacter
ASV2920	2.38019	-0.299309	0.0158422	0.43519	soil_type	soil_type	Root	0.0360294	Proteobacteria	Gammaproteobacteria	Burkholderiales	Alcaligenaceae	Achromobacter
ASV2924	2.67928	0.399761	0.00107203	3.51048	soil_type	soil_type	Root	0.00386345	Bacteroidota	Bacteroidia	Sphingobacteriales	Sphingobacteriaceae	Mucilaginibacter
ASV2968	0.995781	1.32781	0.00134922	2.58772	soil_type	soil_type	Root	0.00475272	Actinobacteriota	Actinobacteria	Micrococcales	Microbacteriaceae	Agromyces
ASV3060	0.841969	-34.3671	0.000628197	0.372587	soil_type	soil_type	Root	0.00248363	Chloroflexi	Chloroflexia	Chloroflexales	Roseiflexaceae	NA
ASV3080	1.75303	5.05188	0.000202393	4.50606	soil_type	soil_type	Root	0.00104199	Proteobacteria	Gammaproteobacteria	Xanthomonadales	Rhodanobacteraceae	Ahniella
ASV3093	2.44819	0.427654	0.00765251	4.72106	soil_type	soil_type	Root	0.0201983	Proteobacteria	Alphaproteobacteria	Rhizobiales	Rhizobiaceae	Allorhizobium-Neorhizobium-Pararhizobium-Rhizobium
ASV3094	2.73787	4.8054	6.02662e-05	6.47575	soil_type	soil_type	Root	0.000444641	Actinobacteriota	Actinobacteria	Corynebacteriales	Nocardiaceae	Rhodococcus
ASV3109	1.06866	6.81801	0.000628197	3.13731	soil_type	soil_type	Root	0.00248363	Proteobacteria	Gammaproteobacteria	Xanthomonadales	Xanthomonadaceae	Arenimonas
ASV3141	2.24878	-3.31035	1.62963e-05	0.181899	soil_type	soil_type	Root	0.000181782	Proteobacteria	Alphaproteobacteria	Sphingomonadales	Sphingomonadaceae	Altererythrobacter
ASV3145	1.25569	-29.2369	6.02662e-05	0.284789	soil_type	soil_type	Root	0.000444641	Actinobacteriota	Actinobacteria	Corynebacteriales	Mycobacteriaceae	Mycobacterium
ASV3162	1.84706	0.598954	0.000788459	3.41919	soil_type	soil_type	Root	0.00297898	Actinobacteriota	Actinobacteria	Pseudonocardiales	Pseudonocardiaceae	Pseudonocardia
ASV3190	2.39675	-0.48957	0.00303857	0.281581	soil_type	soil_type	Root	0.00936558	Bacteroidota	Bacteroidia	Cytophagales	Cyclobacteriaceae	Algoriphagus
ASV3271	1.25456	-10.2299	1.62963e-05	0.284971	soil_type	soil_type	Root	0.000181782	Dependentiae	Babeliae	Babeliales	Vermiphilaceae	NA
ASV3275	0.910906	-0.906116	0.00427664	0.418606	soil_type	soil_type	Root	0.0125126	Chloroflexi	Chloroflexia	Thermomicrobiales	JG30-KF-CM45	NA
ASV3277	0.845375	-15.2874	6.02662e-05	0.371644	soil_type	soil_type	Root	0.000444641	Gemmatimonadota	Gemmatimonadetes	Gemmatimonadales	Gemmatimonadaceae	Gemmatimonas
ASV3317	2.44778	0.315181	0.00937331	2.62436	soil_type	soil_type	Root	0.0236733	Proteobacteria	Alphaproteobacteria	Caulobacterales	Caulobacteraceae	Caulobacter
ASV3354	0.452281	-14.306	0.000628197	0.525055	soil_type	soil_type	Root	0.00248363	Bdellovibrionota	Bdellovibrionia	Bacteriovoracales	Bacteriovoracaceae	Bacteriovorax
ASV3488	1.33469	-0.797393	0.00368769	0.320338	soil_type	soil_type	Root	0.0110043	Proteobacteria	Gammaproteobacteria	Xanthomonadales	Rhodanobacteraceae	Ahniella
ASV3748	1.27294	0.696168	0.00576441	2.05656	soil_type	soil_type	Root	0.0160889	Actinobacteriota	Actinobacteria	Propionibacteriales	Nocardioidaceae	Nocardioides
ASV3883	1.18678	0.510714	0.0161398	2.30267	soil_type	soil_type	Root	0.0366175	Proteobacteria	Gammaproteobacteria	Xanthomonadales	Xanthomonadaceae	Thermomonas
ASV3943	1.47494	9.42695	6.02662e-05	3.94988	soil_type	soil_type	Root	0.000444641	Proteobacteria	Gammaproteobacteria	Xanthomonadales	Xanthomonadaceae	Pseudoxanthomonas
ASV3945	0.487031	29.643	6.02662e-05	1.97406	soil_type	soil_type	Root	0.000444641	Proteobacteria	Gammaproteobacteria	Xanthomonadales	Xanthomonadaceae	Arenimonas
ASV3999	0.853781	1.39542	0.00330776	2.57938	soil_type	soil_type	Root	0.0100957	Actinobacteriota	Actinobacteria	Pseudonocardiales	Pseudonocardiaceae	Pseudonocardia
ASV4089	1.45513	5.64141	0.000628197	3.91025	soil_type	soil_type	Root	0.00248363	Proteobacteria	Alphaproteobacteria	Rhizobiales	Beijerinckiaceae	Methylobacterium-Methylorubrum
ASV4091	1.21338	13.902	6.02662e-05	3.42675	soil_type	soil_type	Root	0.000444641	Proteobacteria	Gammaproteobacteria	Diplorickettsiales	Diplorickettsiaceae	Aquicella
ASV4112	1.08731	-12.4076	0.000628197	0.314998	soil_type	soil_type	Root	0.00248363	Proteobacteria	Gammaproteobacteria	Legionellales	Legionellaceae	Legionella
ASV4147	1.44491	-4.60887	0.000202393	0.257082	soil_type	soil_type	Root	0.00104199	Proteobacteria	Alphaproteobacteria	Ferrovibrionales	Ferrovibrionaceae	Ferrovibrio
ASV4197	1.62253	30.2842	6.02662e-05	4.24506	soil_type	soil_type	Root	0.000444641	Actinobacteriota	Thermoleophilia	Solirubrobacterales	Solirubrobacteraceae	Solirubrobacter
ASV4428	1.46609	0.494034	0.00609145	3.19337	soil_type	soil_type	Root	0.0168369	Actinobacteriota	Actinobacteria	Propionibacteriales	Nocardioidaceae	Nocardioides
ASV4480	1.04253	0.683956	0.00973395	2.09021	soil_type	soil_type	Root	0.0244523	Proteobacteria	Gammaproteobacteria	Burkholderiales	Comamonadaceae	NA
ASV4705	1.29062	-4.61628	0.000628197	0.279232	soil_type	soil_type	Root	0.00248363	Proteobacteria	Gammaproteobacteria	Burkholderiales	Comamonadaceae	NA
ASV4706	1.26222	0.599497	0.00904344	3.0177	soil_type	soil_type	Root	0.0231522	Firmicutes	Bacilli	Bacillales	Bacillaceae	NA
ASV4784	0.941438	1.79028	0.00725935	2.72838	soil_type	soil_type	Root	0.019379	Proteobacteria	Gammaproteobacteria	Xanthomonadales	Xanthomonadaceae	Stenotrophomonas
ASV4992	1.18322	-0.537123	0.0128615	0.398603	soil_type	soil_type	Root	0.0303557	Proteobacteria	Gammaproteobacteria	Xanthomonadales	Rhodanobacteraceae	Dokdonella
ASV5137	0.947	-0.979038	0.00613735	0.446743	soil_type	soil_type	Root	0.0169138	Proteobacteria	Alphaproteobacteria	Rhizobiales	Rhizobiaceae	Allorhizobium-Neorhizobium-Pararhizobium-Rhizobium
ASV5368	0.949937	-5.02922	0.000628197	0.344842	soil_type	soil_type	Root	0.00248363	Actinobacteriota	Thermoleophilia	Gaiellales	Gaiellaceae	Gaiella
ASV5972	0.429187	-1.60711	0.00892124	0.643807	soil_type	soil_type	Root	0.0230917	Proteobacteria	Gammaproteobacteria	Xanthomonadales	Rhodanobacteraceae	Dokdonella
ASV6748	0.617219	1.07411	0.0112683	1.87107	soil_type	soil_type	Root	0.0271425	Proteobacteria	Gammaproteobacteria	Burkholderiales	Comamonadaceae	NA
ASV17	1.91497	-0.36912	0.0128119	0.29307	soil_type	soil_type	stained_soil	0.0263021	Firmicutes	Bacilli	Paenibacillales	Paenibacillaceae	Paenibacillus
ASV33	476.934	0.0150692	1.36009e-07	2.47122	soil_type	soil_type	stained_soil	4.56416e-06	Actinobacteriota	Actinobacteria	Micrococcales	Intrasporangiaceae	Intrasporangium
ASV35	546.461	0.00235466	0.00547599	2.68362	soil_type	soil_type	stained_soil	0.0127238	Proteobacteria	Gammaproteobacteria	Burkholderiales	Methylophilaceae	MM2
ASV63	252.264	0.00979462	0.00069213	7.70207	soil_type	soil_type	stained_soil	0.00199631	Proteobacteria	Gammaproteobacteria	Burkholderiales	Methylophilaceae	Methylophilus
ASV66	253.525	0.0404686	9.03713e-08	2.24836	soil_type	soil_type	stained_soil	3.21833e-06	Actinobacteriota	Thermoleophilia	Gaiellales	Gaiellaceae	Gaiella
ASV69	230.4	0.0132836	0.00150074	1.7562	soil_type	soil_type	stained_soil	0.00400426	Actinobacteriota	Actinobacteria	Micrococcales	Intrasporangiaceae	NA
ASV81	16.8446	0.0571124	0.0101019	3.24088	soil_type	soil_type	stained_soil	0.0214712	Proteobacteria	Gammaproteobacteria	Xanthomonadales	Xanthomonadaceae	Pseudoxanthomonas
ASV82	20.6575	-0.173838	0.000489505	0.573939	soil_type	soil_type	stained_soil	0.00167986	Firmicutes	Clostridia	Peptostreptococcales-Tissierellales	Peptostreptococcaceae	Romboutsia
ASV96	187.953	0.0566562	1.69768e-07	14.4869	soil_type	soil_type	stained_soil	5.49334e-06	Proteobacteria	Gammaproteobacteria	Burkholderiales	Comamonadaceae	Methylibium
ASV98	129.306	-0.0390353	0.000363226	0.65435	soil_type	soil_type	stained_soil	0.00134002	Proteobacteria	Alphaproteobacteria	Rhizobiales	Xanthobacteraceae	Bradyrhizobium
ASV107	143.782	-0.0344545	1.03412e-05	0.415164	soil_type	soil_type	stained_soil	9.95311e-05	Actinobacteriota	Thermoleophilia	Gaiellales	Gaiellaceae	Gaiella
ASV122	54.4493	-0.0940256	1.02611e-05	0.305262	soil_type	soil_type	stained_soil	9.95311e-05	Firmicutes	Bacilli	Bacillales	Bacillaceae	Bacillus
ASV127	119.663	0.0143603	0.0085726	1.85764	soil_type	soil_type	stained_soil	0.0185828	Actinobacteriota	Actinobacteria	Propionibacteriales	Nocardioidaceae	Nocardioides
ASV136	118.915	-0.0181251	0.00613398	0.562749	soil_type	soil_type	stained_soil	0.0139402	Actinobacteriota	Thermoleophilia	Gaiellales	Gaiellaceae	Gaiella
ASV149	103.169	0.0319184	6.25696e-05	13.3113	soil_type	soil_type	stained_soil	0.000330861	Proteobacteria	Gammaproteobacteria	Burkholderiales	Methylophilaceae	Methylophilus
ASV153	106.608	0.0356081	8.94829e-06	3.60647	soil_type	soil_type	stained_soil	8.974e-05	Actinobacteriota	Actinobacteria	Propionibacteriales	Nocardioidaceae	Nocardioides
ASV154	104.498	0.0496931	8.66635e-06	2.13422	soil_type	soil_type	stained_soil	8.74149e-05	Proteobacteria	Alphaproteobacteria	Azospirillales	Azospirillaceae	Skermanella
ASV163	99.3927	0.0597561	2.9273e-06	2.07594	soil_type	soil_type	stained_soil	3.59728e-05	Gemmatimonadota	Gemmatimonadetes	Gemmatimonadales	Gemmatimonadaceae	NA
ASV164	108.421	-0.0295032	6.00796e-05	0.39307	soil_type	soil_type	stained_soil	0.000319631	Proteobacteria	Gammaproteobacteria	Steroidobacterales	Steroidobacteraceae	Steroidobacter
ASV167	74.4594	0.0319144	0.000138127	6.7535	soil_type	soil_type	stained_soil	0.000671396	Actinobacteriota	Actinobacteria	Micrococcales	Intrasporangiaceae	Terrabacter
ASV168	100.548	0.022809	1.83092e-05	6.68873	soil_type	soil_type	stained_soil	0.000137713	Actinobacteriota	Rubrobacteria	Rubrobacterales	Rubrobacteriaceae	Rubrobacter
ASV170	88.877	0.0135544	0.025519	9.92831	soil_type	soil_type	stained_soil	0.0473228	Proteobacteria	Gammaproteobacteria	Burkholderiales	Methylophilaceae	Methylobacillus
ASV172	81.6919	-0.0898354	1.46561e-05	0.0298093	soil_type	soil_type	stained_soil	0.000113163	Proteobacteria	Alphaproteobacteria	Rhizobiales	Hyphomicrobiaceae	Hyphomicrobium
ASV179	87.3203	-0.114056	5.12187e-08	0.302502	soil_type	soil_type	stained_soil	2.61101e-06	Actinobacteriota	Actinobacteria	Propionibacteriales	Nocardioidaceae	Nocardioides
ASV181	74.8224	-0.053521	5.38736e-07	0.150228	soil_type	soil_type	stained_soil	1.11916e-05	Actinobacteriota	Actinobacteria	Streptomycetales	Streptomycetaceae	Streptomyces
ASV182	99.7265	-0.0218786	0.00117803	0.453552	soil_type	soil_type	stained_soil	0.00323218	Nitrospirota	Nitrospiria	Nitrospirales	Nitrospiraceae	Nitrospira
ASV185	93.2735	0.0166587	0.00128828	6.42013	soil_type	soil_type	stained_soil	0.00350162	Proteobacteria	Gammaproteobacteria	Burkholderiales	Methylophilaceae	Methylotenera
ASV191	84.8429	0.068558	1.69995e-07	2.73124	soil_type	soil_type	stained_soil	5.49334e-06	Actinobacteriota	Actinobacteria	Micrococcales	Intrasporangiaceae	Intrasporangium
ASV205	75.591	-0.0241402	0.0233389	0.660653	soil_type	soil_type	stained_soil	0.0437918	Actinobacteriota	Actinobacteria	Corynebacteriales	Mycobacteriaceae	Mycobacterium
ASV212	80.8396	0.0186741	0.00737767	2.19808	soil_type	soil_type	stained_soil	0.0162963	Firmicutes	Bacilli	Bacillales	Bacillaceae	NA
ASV217	86.271	0.115465	1.19188e-08	2.46058	soil_type	soil_type	stained_soil	1.03991e-06	Actinobacteriota	Actinobacteria	Propionibacteriales	Nocardioidaceae	Nocardioides
ASV223	75.0299	0.0399637	0.000657044	2.12923	soil_type	soil_type	stained_soil	0.00190455	Actinobacteriota	Actinobacteria	Micrococcales	Intrasporangiaceae	NA
ASV227	72.8089	-0.108784	7.91755e-08	0.3089	soil_type	soil_type	stained_soil	3.0035e-06	Proteobacteria	Alphaproteobacteria	Sphingomonadales	Sphingomonadaceae	Sphingomonas
ASV237	74.887	-0.0461378	0.000102117	0.440723	soil_type	soil_type	stained_soil	0.000518006	Acidobacteriota	Blastocatellia	Pyrinomonadales	Pyrinomonadaceae	RB41
ASV243	59.3904	-0.0654206	4.68501e-05	0.344908	soil_type	soil_type	stained_soil	0.000277678	Actinobacteriota	Thermoleophilia	Solirubrobacterales	67-14	NA
ASV249	53.1225	0.0440032	0.00196485	2.58151	soil_type	soil_type	stained_soil	0.00510219	Chloroflexi	Chloroflexia	Thermomicrobiales	JG30-KF-CM45	NA
ASV255	68.4632	0.273024	2.82688e-09	39.3184	soil_type	soil_type	stained_soil	5.6876e-07	Actinobacteriota	Thermoleophilia	Solirubrobacterales	67-14	NA
ASV256	63.2154	0.164423	1.30717e-09	8.9159	soil_type	soil_type	stained_soil	5.6876e-07	Proteobacteria	Alphaproteobacteria	Rhizobiales	Beijerinckiaceae	Microvirga
ASV257	25.3333	1.31781	5.21499e-09	51.6666	soil_type	soil_type	stained_soil	5.6876e-07	Proteobacteria	Gammaproteobacteria	Burkholderiales	Burkholderiaceae	Burkholderia-Caballeronia-Paraburkholderia
ASV258	31.1377	0.0239936	0.0167068	6.57148	soil_type	soil_type	stained_soil	0.0329046	Proteobacteria	Alphaproteobacteria	Rhizobiales	Beijerinckiaceae	Methylobacterium-Methylorubrum
ASV262	69.2394	0.0595271	1.40033e-06	3.60918	soil_type	soil_type	stained_soil	2.40983e-05	Actinobacteriota	Thermoleophilia	Solirubrobacterales	67-14	NA
ASV263	32.6141	0.0260092	0.0099933	4.19557	soil_type	soil_type	stained_soil	0.0212662	Actinobacteriota	Actinobacteria	Propionibacteriales	Nocardioidaceae	Nocardioides
ASV265	65.3957	0.0367367	0.00436985	1.72444	soil_type	soil_type	stained_soil	0.010403	Actinobacteriota	Actinobacteria	Frankiales	Sporichthyaceae	NA
ASV269	65.6234	0.0428156	1.59558e-06	6.8824	soil_type	soil_type	stained_soil	2.6517e-05	Actinobacteriota	Actinobacteria	Propionibacteriales	Propionibacteriaceae	NA
ASV279	31.8713	-0.0782779	0.000562896	0.436487	soil_type	soil_type	stained_soil	0.00167986	Firmicutes	Bacilli	Bacillales	Bacillaceae	Bacillus
ASV282	69.7016	0.0486811	2.57518e-07	12.3556	soil_type	soil_type	stained_soil	7.61643e-06	Actinobacteriota	Actinobacteria	Micrococcales	Intrasporangiaceae	Intrasporangium
ASV286	60.6779	-0.20303	0.000368568	0.010838	soil_type	soil_type	stained_soil	0.001354	Proteobacteria	Gammaproteobacteria	Burkholderiales	Methylophilaceae	Methylotenera
ASV289	56.5093	-0.0808172	0.000265438	0.607269	soil_type	soil_type	stained_soil	0.00102476	Nitrospirota	Nitrospiria	Nitrospirales	Nitrospiraceae	Nitrospira
ASV301	20.2221	0.0706774	0.00815649	2.0276	soil_type	soil_type	stained_soil	0.0178359	Proteobacteria	Alphaproteobacteria	Rhizobiales	Rhizobiaceae	Allorhizobium-Neorhizobium-Pararhizobium-Rhizobium
ASV305	58.5903	0.060949	8.83564e-08	12.8486	soil_type	soil_type	stained_soil	3.21212e-06	Actinobacteriota	Actinobacteria	Propionibacteriales	Propionibacteriaceae	Microlunatus
ASV311	45.2641	0.28089	7.4915e-08	2.31633	soil_type	soil_type	stained_soil	2.93725e-06	Actinobacteriota	Actinobacteria	Micrococcales	Microbacteriaceae	Agromyces
ASV317	58.5745	0.027752	0.00688972	2.07547	soil_type	soil_type	stained_soil	0.0153545	Actinobacteriota	Actinobacteria	Micromonosporales	Micromonosporaceae	Luedemannella
ASV322	52.389	-0.129619	5.87322e-05	0.632681	soil_type	soil_type	stained_soil	0.000316152	Proteobacteria	Alphaproteobacteria	Defluviicoccales	Defluviicoccaceae	Defluviicoccus
ASV323	49.8378	0.0331726	0.00635408	2.14419	soil_type	soil_type	stained_soil	0.014344	Firmicutes	Bacilli	Bacillales	Bacillaceae	NA
ASV325	52.5942	0.0358848	0.00163181	2.4715	soil_type	soil_type	stained_soil	0.00432094	Proteobacteria	Gammaproteobacteria	Burkholderiales	Comamonadaceae	Ramlibacter
ASV326	8.58893	-4.36647	0.000570862	0.055012	soil_type	soil_type	stained_soil	0.00167986	Proteobacteria	Gammaproteobacteria	Burkholderiales	Methylophilaceae	UBA6140
ASV328	48.8582	0.0842027	6.77872e-05	2.00615	soil_type	soil_type	stained_soil	0.000353101	Actinobacteriota	Thermoleophilia	Solirubrobacterales	Solirubrobacteraceae	Solirubrobacter
ASV329	55.2773	0.0452317	0.000477391	2.33503	soil_type	soil_type	stained_soil	0.00167278	Nitrospirota	Nitrospiria	Nitrospirales	Nitrospiraceae	Nitrospira
ASV331	52.4026	0.0676353	0.000290751	1.99159	soil_type	soil_type	stained_soil	0.00110536	Actinobacteriota	Acidimicrobiia	Microtrichales	Iamiaceae	Iamia
ASV335	3.22433	0.175923	0.0228501	3.79094	soil_type	soil_type	stained_soil	0.0430134	Proteobacteria	Gammaproteobacteria	Burkholderiales	Comamonadaceae	Variovorax
ASV340	47.847	0.0429777	3.46115e-05	6.93968	soil_type	soil_type	stained_soil	0.000240684	Chloroflexi	Chloroflexia	Chloroflexales	Roseiflexaceae	NA
ASV342	47.7909	0.087469	0.000698356	1.60256	soil_type	soil_type	stained_soil	0.00200763	Actinobacteriota	Actinobacteria	Micromonosporales	Micromonosporaceae	Krasilnikovia
ASV344	47.8577	-0.893578	5.21499e-09	0.0103396	soil_type	soil_type	stained_soil	5.6876e-07	Proteobacteria	Gammaproteobacteria	Burkholderiales	SC-I-84	NA
ASV347	4.9804	-0.408877	2.45413e-05	0.211269	soil_type	soil_type	stained_soil	0.000179182	Firmicutes	Clostridia	Clostridiales	Clostridiaceae	Clostridium sensu stricto 1
ASV356	49.3497	-0.0702002	0.0023647	0.665536	soil_type	soil_type	stained_soil	0.00599768	Proteobacteria	Alphaproteobacteria	Defluviicoccales	Defluviicoccaceae	Defluviicoccus
ASV358	48.057	0.0716447	4.08831e-05	2.60317	soil_type	soil_type	stained_soil	0.000272294	Actinobacteriota	Acidimicrobiia	Microtrichales	Iamiaceae	Iamia
ASV361	40.2006	0.202259	8.82794e-07	2.57627	soil_type	soil_type	stained_soil	1.67443e-05	Actinobacteriota	Actinobacteria	Pseudonocardiales	Pseudonocardiaceae	Pseudonocardia
ASV363	45.0907	-0.0916807	4.24904e-05	0.361459	soil_type	soil_type	stained_soil	0.000277678	Actinobacteriota	Thermoleophilia	Gaiellales	Gaiellaceae	Gaiella
ASV365	55.4272	-0.0271929	0.00132184	0.113303	soil_type	soil_type	stained_soil	0.00357614	Proteobacteria	Gammaproteobacteria	Burkholderiales	Methylophilaceae	NA
ASV368	46.8746	0.0729215	0.000169734	2.01529	soil_type	soil_type	stained_soil	0.000709227	Gemmatimonadota	Gemmatimonadetes	Gemmatimonadales	Gemmatimonadaceae	Gemmatimonas
ASV375	43.3252	0.0686478	0.000131196	2.42371	soil_type	soil_type	stained_soil	0.000643082	Proteobacteria	Alphaproteobacteria	Rhizobiales	Beijerinckiaceae	Microvirga
ASV378	47.4172	-0.0907314	5.92444e-05	0.465675	soil_type	soil_type	stained_soil	0.000316152	Actinobacteriota	Actinobacteria	Frankiales	Geodermatophilaceae	Blastococcus
ASV379	48.8187	0.0692692	0.000248212	2.06809	soil_type	soil_type	stained_soil	0.000962509	Actinobacteriota	Thermoleophilia	Gaiellales	Gaiellaceae	Gaiella
ASV382	49.7088	0.0446508	0.000436916	4.00253	soil_type	soil_type	stained_soil	0.00155914	Proteobacteria	Gammaproteobacteria	Burkholderiales	Methylophilaceae	MM2
ASV385	37.1206	0.0671691	5.89398e-05	3.16761	soil_type	soil_type	stained_soil	0.000316152	Proteobacteria	Alphaproteobacteria	Tistrellales	Geminicoccaceae	Candidatus Alysiosphaera
ASV386	34.2722	0.0550724	0.000114491	5.14206	soil_type	soil_type	stained_soil	0.000572455	Actinobacteriota	Actinobacteria	Micrococcales	Intrasporangiaceae	Intrasporangium
ASV394	39.6678	-0.0673395	0.0122553	0.702035	soil_type	soil_type	stained_soil	0.0253684	Proteobacteria	Alphaproteobacteria	Defluviicoccales	Defluviicoccaceae	Defluviicoccus
ASV398	42.4634	-0.0658147	0.00348698	0.335168	soil_type	soil_type	stained_soil	0.00854603	Proteobacteria	Gammaproteobacteria	Burkholderiales	Nitrosomonadaceae	Ellin6067
ASV404	43.03	0.17828	2.63941e-08	3.78148	soil_type	soil_type	stained_soil	2.09354e-06	Proteobacteria	Alphaproteobacteria	Azospirillales	Azospirillaceae	Skermanella
ASV406	41.2688	0.127127	1.28356e-06	2.75226	soil_type	soil_type	stained_soil	2.26244e-05	Proteobacteria	Alphaproteobacteria	Azospirillales	Azospirillaceae	Skermanella
ASV408	10.0056	0.211879	1.80485e-05	6.19213	soil_type	soil_type	stained_soil	0.000136341	Proteobacteria	Gammaproteobacteria	Burkholderiales	Comamonadaceae	Variovorax
ASV409	34.4754	0.165967	9.46865e-07	2.53965	soil_type	soil_type	stained_soil	1.75774e-05	Actinobacteriota	Actinobacteria	Micromonosporales	Micromonosporaceae	Dactylosporangium
ASV411	38.0509	0.162271	5.18858e-08	4.30831	soil_type	soil_type	stained_soil	2.61101e-06	Actinobacteriota	Rubrobacteria	Rubrobacterales	Rubrobacteriaceae	Rubrobacter
ASV418	32.7878	-0.0578009	0.000282942	0.231891	soil_type	soil_type	stained_soil	0.00108262	Proteobacteria	Alphaproteobacteria	Rhizobiales	Hyphomicrobiaceae	Hyphomicrobium
ASV420	41.5679	-0.111386	5.49163e-05	0.539805	soil_type	soil_type	stained_soil	0.000301104	Actinobacteriota	Thermoleophilia	Solirubrobacterales	Solirubrobacteraceae	Solirubrobacter
ASV421	44.48	-0.0283071	0.0020793	0.210993	soil_type	soil_type	stained_soil	0.00536742	Proteobacteria	Gammaproteobacteria	Burkholderiales	Methylophilaceae	Methylotenera
ASV423	33.7229	-0.212419	3.24739e-08	0.203331	soil_type	soil_type	stained_soil	2.36112e-06	Actinobacteriota	Actinobacteria	Pseudonocardiales	Pseudonocardiaceae	Pseudonocardia
ASV426	42.1234	-0.0615871	1.13179e-05	0.137978	soil_type	soil_type	stained_soil	9.95311e-05	Proteobacteria	Alphaproteobacteria	Rhizobiales	Methyloligellaceae	NA
ASV428	38.5569	0.10155	6.57267e-05	2.06195	soil_type	soil_type	stained_soil	0.000344424	Actinobacteriota	Thermoleophilia	Solirubrobacterales	67-14	NA
ASV433	40.5191	0.0515926	0.00186782	2.24661	soil_type	soil_type	stained_soil	0.00487927	Chloroflexi	Chloroflexia	Chloroflexales	Roseiflexaceae	NA
ASV434	34.2714	-0.0479524	0.0109788	0.556576	soil_type	soil_type	stained_soil	0.0230542	Proteobacteria	Alphaproteobacteria	Sphingomonadales	Sphingomonadaceae	Sphingomonas
ASV438	41.8341	0.0596453	0.000167598	2.91877	soil_type	soil_type	stained_soil	0.000709227	Bacteroidota	Bacteroidia	Chitinophagales	Chitinophagaceae	NA
ASV440	31.9724	-0.112215	5.52437e-05	0.274289	soil_type	soil_type	stained_soil	0.000301251	Actinobacteriota	Thermoleophilia	Solirubrobacterales	67-14	NA
ASV443	27.589	-0.0886829	0.00148299	0.439312	soil_type	soil_type	stained_soil	0.00396298	Firmicutes	Bacilli	Bacillales	Bacillaceae	Bacillus
ASV446	23.3126	0.136154	0.00107507	1.73444	soil_type	soil_type	stained_soil	0.00298251	Proteobacteria	Alphaproteobacteria	Rhizobiales	Xanthobacteraceae	Bradyrhizobium
ASV449	31.1551	-0.0510644	0.00468645	0.116072	soil_type	soil_type	stained_soil	0.0110361	Proteobacteria	Gammaproteobacteria	Burkholderiales	Methylophilaceae	Methylophilus
ASV450	33.9071	0.122462	1.54692e-05	2.7024	soil_type	soil_type	stained_soil	0.000117364	Proteobacteria	Gammaproteobacteria	Xanthomonadales	Xanthomonadaceae	Lysobacter
ASV451	39.3449	0.0536049	4.59356e-05	4.46478	soil_type	soil_type	stained_soil	0.000277678	Actinobacteriota	Actinobacteria	Propionibacteriales	Nocardioidaceae	Nocardioides
ASV453	24.7262	-0.0984355	0.000669141	0.425135	soil_type	soil_type	stained_soil	0.0019364	Proteobacteria	Alphaproteobacteria	Dongiales	Dongiaceae	Dongia
ASV460	39.7199	0.1171	7.57457e-08	5.40176	soil_type	soil_type	stained_soil	2.93725e-06	Proteobacteria	Alphaproteobacteria	Azospirillales	Azospirillaceae	Skermanella
ASV467	31.8854	-0.0523841	0.0190777	0.549527	soil_type	soil_type	stained_soil	0.0370306	Actinobacteriota	Actinobacteria	Corynebacteriales	Mycobacteriaceae	Mycobacterium
ASV470	28.3519	-0.114696	3.54346e-05	0.0571952	soil_type	soil_type	stained_soil	0.000245371	Proteobacteria	Alphaproteobacteria	Rhizobiales	Hyphomicrobiaceae	Hyphomicrobium
ASV481	31.1445	-4.58779	6.28438e-08	0.0158005	soil_type	soil_type	stained_soil	2.61101e-06	Proteobacteria	Alphaproteobacteria	Rhodobacterales	Rhodobacteraceae	NA
ASV486	1.8881	0.556072	0.00218488	3.86567	soil_type	soil_type	stained_soil	0.00559034	Proteobacteria	Gammaproteobacteria	Xanthomonadales	Xanthomonadaceae	Thermomonas
ASV490	37.6459	0.0479712	0.000510083	4.54808	soil_type	soil_type	stained_soil	0.00167986	Bacteroidota	Bacteroidia	Chitinophagales	Chitinophagaceae	NA
ASV509	32.8541	0.0574174	0.00678406	1.81929	soil_type	soil_type	stained_soil	0.0151577	Actinobacteriota	Actinobacteria	Propionibacteriales	Nocardioidaceae	NA
ASV513	31.3635	0.163533	3.81543e-06	2.25701	soil_type	soil_type	stained_soil	4.39637e-05	Proteobacteria	Alphaproteobacteria	Rhizobiales	Beijerinckiaceae	Microvirga
ASV527	28.7021	-0.835321	5.21499e-09	0.017122	soil_type	soil_type	stained_soil	5.6876e-07	Actinobacteriota	Actinobacteria	Corynebacteriales	Mycobacteriaceae	Mycobacterium
ASV537	29.9621	-0.146677	4.22619e-07	0.0813244	soil_type	soil_type	stained_soil	1.00775e-05	Actinobacteriota	Acidimicrobiia	Microtrichales	Ilumatobacteraceae	NA
ASV538	5.06053	-4.55889	0.000570862	0.0899194	soil_type	soil_type	stained_soil	0.00167986	Proteobacteria	Gammaproteobacteria	Pseudomonadales	Cellvibrionaceae	Cellvibrio
ASV539	31.2948	0.139174	2.43079e-07	4.88903	soil_type	soil_type	stained_soil	7.40603e-06	Actinobacteriota	Thermoleophilia	Gaiellales	Gaiellaceae	Gaiella
ASV541	28.9013	-0.181121	3.13167e-08	0.044963	soil_type	soil_type	stained_soil	2.36112e-06	Proteobacteria	Gammaproteobacteria	Burkholderiales	SC-I-84	NA
ASV543	36.5506	-2.21062	0.000176392	0.0134951	soil_type	soil_type	stained_soil	0.000709227	Proteobacteria	Gammaproteobacteria	Burkholderiales	B1-7BS	NA
ASV545	23.5579	-0.777334	5.21499e-09	0.0207832	soil_type	soil_type	stained_soil	5.6876e-07	Actinobacteriota	Actinobacteria	Propionibacteriales	Nocardioidaceae	Nocardioides
ASV548	32.0661	-0.249664	0.00031941	0.0245536	soil_type	soil_type	stained_soil	0.00120382	Proteobacteria	Gammaproteobacteria	Burkholderiales	Methylophilaceae	Methylotenera
ASV550	22.3466	0.0633068	0.00388389	2.50999	soil_type	soil_type	stained_soil	0.00937398	Proteobacteria	Alphaproteobacteria	Azospirillales	Azospirillaceae	Skermanella
ASV551	31.164	0.180354	2.88263e-06	2.66002	soil_type	soil_type	stained_soil	3.56751e-05	Actinobacteriota	Actinobacteria	Propionibacteriales	Propionibacteriaceae	Microlunatus
ASV555	28.5653	0.117671	7.44758e-06	3.40935	soil_type	soil_type	stained_soil	7.82893e-05	Actinobacteriota	Acidimicrobiia	Microtrichales	Ilumatobacteraceae	NA
ASV556	29.4909	0.0693624	0.000426468	3.56678	soil_type	soil_type	stained_soil	0.00152497	Chloroflexi	Chloroflexia	Thermomicrobiales	AKYG1722	NA
ASV563	32.0411	0.0647921	0.0125897	1.54703	soil_type	soil_type	stained_soil	0.0259376	Actinobacteriota	Actinobacteria	Micromonosporales	Micromonosporaceae	Virgisporangium
ASV574	22.7309	0.103226	8.1076e-05	6.63279	soil_type	soil_type	stained_soil	0.000418573	Proteobacteria	Gammaproteobacteria	Xanthomonadales	Xanthomonadaceae	NA
ASV576	21.8072	-1.35102	5.21499e-09	0.0224143	soil_type	soil_type	stained_soil	5.6876e-07	Chloroflexi	Chloroflexia	Thermomicrobiales	JG30-KF-CM45	NA
ASV578	28.1154	-0.0460863	0.0141562	0.486081	soil_type	soil_type	stained_soil	0.0285693	Actinobacteriota	Acidimicrobiia	Microtrichales	Ilumatobacteraceae	NA
ASV580	29.2998	-0.147371	5.61335e-07	0.13304	soil_type	soil_type	stained_soil	1.15239e-05	Proteobacteria	Alphaproteobacteria	Rhizobiales	Xanthobacteraceae	NA
ASV584	31.6607	0.0815801	9.96858e-06	8.74219	soil_type	soil_type	stained_soil	9.82778e-05	Acidobacteriota	Vicinamibacteria	Vicinamibacterales	Vicinamibacteraceae	NA
ASV590	23.7937	-0.330175	7.40882e-09	0.0282822	soil_type	soil_type	stained_soil	7.60494e-07	Actinobacteriota	Actinobacteria	Corynebacteriales	Nocardiaceae	NA
ASV591	25.2014	-1.34633	5.21499e-09	0.0194542	soil_type	soil_type	stained_soil	5.6876e-07	Proteobacteria	Alphaproteobacteria	Rhodobacterales	Rhodobacteraceae	Amaricoccus
ASV596	27.3362	0.149385	1.1287e-05	2.50999	soil_type	soil_type	stained_soil	9.95311e-05	Actinobacteriota	Thermoleophilia	Solirubrobacterales	Solirubrobacteraceae	Solirubrobacter
ASV599	35.8019	-0.0261696	0.0135711	0.291896	soil_type	soil_type	stained_soil	0.0276653	Proteobacteria	Gammaproteobacteria	Burkholderiales	Nitrosomonadaceae	MND1
ASV605	20.7114	-6.56641	1.24343e-05	0.0235722	soil_type	soil_type	stained_soil	9.95311e-05	Proteobacteria	Gammaproteobacteria	Xanthomonadales	Xanthomonadaceae	Thermomonas
ASV610	23.174	-0.0875439	0.000799721	0.173482	soil_type	soil_type	stained_soil	0.00227282	Actinobacteriota	Actinobacteria	Propionibacteriales	Nocardioidaceae	Nocardioides
ASV613	25.3742	-2.54695	5.21499e-09	0.0193242	soil_type	soil_type	stained_soil	5.6876e-07	Proteobacteria	Alphaproteobacteria	Dongiales	Dongiaceae	Dongia
ASV614	21.1713	0.0487291	0.00937632	3.7295	soil_type	soil_type	stained_soil	0.0201003	Proteobacteria	Gammaproteobacteria	Burkholderiales	Methylophilaceae	Methylophilus
ASV620	23.2654	0.0481789	0.00902797	2.55802	soil_type	soil_type	stained_soil	0.0194252	Actinobacteriota	Actinobacteria	Propionibacteriales	Nocardioidaceae	Nocardioides
ASV623	26.4168	0.0353298	0.00910873	3.63135	soil_type	soil_type	stained_soil	0.0195748	Proteobacteria	Gammaproteobacteria	Steroidobacterales	Steroidobacteraceae	Steroidobacter
ASV638	26.0565	-0.159014	4.11278e-06	0.126847	soil_type	soil_type	stained_soil	4.63534e-05	Actinobacteriota	Actinobacteria	Frankiales	Geodermatophilaceae	Geodermatophilus
ASV644	20.4097	-3.26721	1.24343e-05	0.0239124	soil_type	soil_type	stained_soil	9.95311e-05	Gemmatimonadota	Gemmatimonadetes	Gemmatimonadales	Gemmatimonadaceae	NA
ASV645	22.0925	-0.0658784	0.00118965	0.256901	soil_type	soil_type	stained_soil	0.00325383	Proteobacteria	Alphaproteobacteria	Sphingomonadales	Sphingomonadaceae	Sphingomonas
ASV646	27.224	0.124835	3.06907e-07	9.31404	soil_type	soil_type	stained_soil	8.77954e-06	Acidobacteriota	Vicinamibacteria	Vicinamibacterales	Vicinamibacteraceae	NA
ASV647	0.7445	-0.950635	0.0159988	0.477805	soil_type	soil_type	stained_soil	0.0315813	Firmicutes	Clostridia	Eubacteriales	Eubacteriaceae	NA
ASV654	26.218	0.138163	2.4616e-07	7.47744	soil_type	soil_type	stained_soil	7.40603e-06	Actinobacteriota	Actinobacteria	Frankiales	Geodermatophilaceae	Blastococcus
ASV666	24.6663	0.17485	4.44933e-08	10.3868	soil_type	soil_type	stained_soil	2.61101e-06	Actinobacteriota	Acidimicrobiia	Microtrichales	Iamiaceae	Iamia
ASV667	7.5948	0.258573	3.91423e-05	7.84572	soil_type	soil_type	stained_soil	0.00026681	Proteobacteria	Gammaproteobacteria	Burkholderiales	Comamonadaceae	Variovorax
ASV668	23.0605	0.141132	1.04708e-07	10.8435	soil_type	soil_type	stained_soil	3.6543e-06	Actinobacteriota	Thermoleophilia	Solirubrobacterales	Solirubrobacteraceae	Solirubrobacter
ASV670	22.0075	0.0846822	0.00218288	2.37925	soil_type	soil_type	stained_soil	0.00559034	Verrucomicrobiota	Verrucomicrobiae	Chthoniobacterales	Chthoniobacteraceae	Candidatus Udaeobacter
ASV675	23.679	0.0545371	0.0211808	1.84983	soil_type	soil_type	stained_soil	0.0406158	Actinobacteriota	Actinobacteria	Frankiales	Geodermatophilaceae	Blastococcus
ASV676	25.3622	-0.136467	6.73426e-05	0.408169	soil_type	soil_type	stained_soil	0.000351835	Actinobacteriota	Actinobacteria	Micrococcales	Intrasporangiaceae	NA
ASV679	25.2019	-0.0792737	0.000214115	0.286798	soil_type	soil_type	stained_soil	0.000845318	Actinobacteriota	Thermoleophilia	Solirubrobacterales	Solirubrobacteraceae	Solirubrobacter
ASV682	22.5636	0.153921	1.15475e-06	5.51048	soil_type	soil_type	stained_soil	2.06988e-05	Actinobacteriota	Thermoleophilia	Solirubrobacterales	67-14	NA
ASV687	23.8784	0.154208	8.40967e-06	3.63657	soil_type	soil_type	stained_soil	8.54303e-05	Gemmatimonadota	Gemmatimonadetes	Gemmatimonadales	Gemmatimonadaceae	NA
ASV688	29.2931	-3.44856	0.000176392	0.0167824	soil_type	soil_type	stained_soil	0.000709227	Proteobacteria	Gammaproteobacteria	Burkholderiales	B1-7BS	NA
ASV695	16.4261	-2.219	5.21499e-09	0.0295402	soil_type	soil_type	stained_soil	5.6876e-07	Chloroflexi	Chloroflexia	Chloroflexales	Roseiflexaceae	NA
ASV710	23.5367	0.110455	0.0203198	1.33903	soil_type	soil_type	stained_soil	0.0390507	Proteobacteria	Alphaproteobacteria	Rhizobiales	Beijerinckiaceae	Microvirga
ASV713	22.7985	-0.801865	4.73557e-07	0.0214606	soil_type	soil_type	stained_soil	1.00775e-05	Proteobacteria	Gammaproteobacteria	Burkholderiales	Nitrosomonadaceae	966-1
ASV714	24.4849	0.11308	0.000695306	1.98014	soil_type	soil_type	stained_soil	0.00200216	Actinobacteriota	Actinobacteria	Propionibacteriales	Nocardioidaceae	Nocardioides
ASV715	26.3584	-0.196891	1.40893e-06	0.0471273	soil_type	soil_type	stained_soil	2.40983e-05	Proteobacteria	Gammaproteobacteria	Burkholderiales	Rhodocyclaceae	Azovibrio
ASV717	21.0125	0.119066	4.94533e-05	4.50266	soil_type	soil_type	stained_soil	0.000277678	Chloroflexi	Chloroflexia	Thermomicrobiales	JG30-KF-CM45	NA
ASV721	23.0101	0.0519797	0.00830913	2.55316	soil_type	soil_type	stained_soil	0.0181243	Actinobacteriota	Actinobacteria	Micromonosporales	Micromonosporaceae	NA
ASV723	22.4537	-0.0673288	0.00526193	0.415227	soil_type	soil_type	stained_soil	0.0122755	Proteobacteria	Gammaproteobacteria	Steroidobacterales	Steroidobacteraceae	NA
ASV724	23.5833	0.0371471	0.0217613	2.97097	soil_type	soil_type	stained_soil	0.0413654	Chloroflexi	Chloroflexia	Chloroflexales	Herpetosiphonaceae	Herpetosiphon
ASV725	19.6373	-0.211314	2.24873e-07	0.0947105	soil_type	soil_type	stained_soil	7.13461e-06	Proteobacteria	Gammaproteobacteria	Burkholderiales	SC-I-84	NA
ASV731	21.7808	0.0748777	0.000445117	3.76214	soil_type	soil_type	stained_soil	0.00158238	Chloroflexi	Chloroflexia	Thermomicrobiales	JG30-KF-CM45	NA
ASV733	18.8868	0.144773	0.00023603	2.25175	soil_type	soil_type	stained_soil	0.00092348	Actinobacteriota	Acidimicrobiia	Microtrichales	Ilumatobacteraceae	NA
ASV735	21.6497	-2.18689	5.21499e-09	0.0225737	soil_type	soil_type	stained_soil	5.6876e-07	Proteobacteria	Alphaproteobacteria	Rhizobiales	Xanthobacteraceae	Bradyrhizobium
ASV736	21.3332	0.16705	8.42064e-06	3.12818	soil_type	soil_type	stained_soil	8.54303e-05	Actinobacteriota	Thermoleophilia	Solirubrobacterales	Solirubrobacteraceae	Solirubrobacter
ASV738	22.0891	-0.205585	1.13699e-07	0.0351365	soil_type	soil_type	stained_soil	3.89031e-06	Actinobacteriota	Actinobacteria	Pseudonocardiales	Pseudonocardiaceae	Pseudonocardia
ASV739	23.7955	0.0839333	7.17001e-05	4.91515	soil_type	soil_type	stained_soil	0.000371266	Actinobacteriota	Actinobacteria	Propionibacteriales	Propionibacteriaceae	Microlunatus
ASV741	18.5605	-0.0999947	0.00259732	0.287991	soil_type	soil_type	stained_soil	0.00655909	Actinobacteriota	Actinobacteria	Propionibacteriales	Nocardioidaceae	Nocardioides
ASV744	23.0324	0.0916089	0.000268514	2.91035	soil_type	soil_type	stained_soil	0.00103206	Actinobacteriota	Thermoleophilia	Solirubrobacterales	67-14	NA
ASV747	21.3975	0.0879804	0.000105463	4.65126	soil_type	soil_type	stained_soil	0.000531885	Chloroflexi	Chloroflexia	Thermomicrobiales	JG30-KF-CM45	NA
ASV752	21.7095	0.266932	2.21627e-06	2.67802	soil_type	soil_type	stained_soil	3.34219e-05	Proteobacteria	Gammaproteobacteria	Burkholderiales	Comamonadaceae	Methylibium
ASV753	24.4394	-0.148462	3.3509e-07	0.139256	soil_type	soil_type	stained_soil	9.43115e-06	Actinobacteriota	Actinobacteria	Frankiales	Geodermatophilaceae	Klenkia
ASV756	21.8808	0.136582	3.94668e-07	17.8356	soil_type	soil_type	stained_soil	1.00775e-05	Actinobacteriota	Actinobacteria	Micromonosporales	Micromonosporaceae	Hamadaea
ASV759	22.5826	0.201396	2.17161e-08	13.3475	soil_type	soil_type	stained_soil	1.80451e-06	Actinobacteriota	Thermoleophilia	Gaiellales	Gaiellaceae	Gaiella
ASV764	18.5813	-0.208624	1.15726e-06	0.0823981	soil_type	soil_type	stained_soil	2.06988e-05	Actinobacteriota	Actinobacteria	Propionibacteriales	Nocardioidaceae	NA
ASV767	15.8833	-0.0734087	0.00169619	0.228055	soil_type	soil_type	stained_soil	0.00444718	Proteobacteria	Alphaproteobacteria	Rhizobiales	Hyphomicrobiaceae	Hyphomicrobium
ASV773	21.8663	-0.0370127	0.015068	0.28311	soil_type	soil_type	stained_soil	0.0299814	Actinobacteriota	Actinobacteria	Frankiales	Geodermatophilaceae	Blastococcus
ASV776	22.6861	0.127986	6.0171e-07	8.64341	soil_type	soil_type	stained_soil	1.19316e-05	Proteobacteria	Alphaproteobacteria	Rhizobiales	Beijerinckiaceae	NA
ASV780	19.0496	0.13924	3.23721e-05	3.83763	soil_type	soil_type	stained_soil	0.000227779	Actinobacteriota	Rubrobacteria	Rubrobacterales	Rubrobacteriaceae	Rubrobacter
ASV783	20.9101	0.137487	3.55344e-07	9.09651	soil_type	soil_type	stained_soil	9.84246e-06	Actinobacteriota	Actinobacteria	Pseudonocardiales	Pseudonocardiaceae	Pseudonocardia
ASV786	18.222	-2.3518	5.21499e-09	0.0267066	soil_type	soil_type	stained_soil	5.6876e-07	Actinobacteriota	Thermoleophilia	Solirubrobacterales	Solirubrobacteraceae	Solirubrobacter
ASV792	20.3171	0.195432	7.00431e-06	3.20367	soil_type	soil_type	stained_soil	7.40759e-05	Proteobacteria	Gammaproteobacteria	Burkholderiales	SC-I-84	NA
ASV794	20.2088	0.0984177	0.00168235	2.1384	soil_type	soil_type	stained_soil	0.00442124	Actinobacteriota	Acidimicrobiia	Microtrichales	Ilumatobacteraceae	Ilumatobacter
ASV795	11.7073	0.552404	1.16246e-06	12.9702	soil_type	soil_type	stained_soil	2.06988e-05	Proteobacteria	Gammaproteobacteria	Xanthomonadales	Xanthomonadaceae	Arenimonas
ASV807	24.7485	0.0430443	0.00583441	3.14234	soil_type	soil_type	stained_soil	0.0133435	Acidobacteriota	Blastocatellia	Pyrinomonadales	Pyrinomonadaceae	RB41
ASV808	18.8719	0.168558	0.000163575	2.32424	soil_type	soil_type	stained_soil	0.000709227	Proteobacteria	Alphaproteobacteria	Reyranellales	Reyranellaceae	Reyranella
ASV819	23.2582	-0.244413	9.35952e-07	0.0974507	soil_type	soil_type	stained_soil	1.75617e-05	Proteobacteria	Gammaproteobacteria	Burkholderiales	Nitrosomonadaceae	MND1
ASV821	20.3392	-0.0921638	0.00675187	0.566518	soil_type	soil_type	stained_soil	0.0151273	Proteobacteria	Gammaproteobacteria	Gammaproteobacteria Incertae Sedis	Unknown Family	Acidibacter
ASV822	18.5988	-0.28035	3.49993e-08	0.0999626	soil_type	soil_type	stained_soil	2.44295e-06	Proteobacteria	Gammaproteobacteria	Burkholderiales	SC-I-84	NA
ASV826	18.5329	-0.264788	8.68685e-09	0.0417806	soil_type	soil_type	stained_soil	8.05278e-07	Proteobacteria	Alphaproteobacteria	Defluviicoccales	Defluviicoccaceae	Defluviicoccus
ASV827	20.6955	0.0897257	0.000289671	3.46805	soil_type	soil_type	stained_soil	0.00110366	Nitrospirota	Nitrospiria	Nitrospirales	Nitrospiraceae	Nitrospira
ASV829	18.8008	-2.55525	6.28438e-08	0.0259057	soil_type	soil_type	stained_soil	2.61101e-06	Actinobacteriota	Thermoleophilia	Gaiellales	Gaiellaceae	Gaiella
ASV832	17.3917	-0.178243	0.000395598	0.450557	soil_type	soil_type	stained_soil	0.00143518	Actinobacteriota	Thermoleophilia	Solirubrobacterales	Solirubrobacteraceae	Solirubrobacter
ASV833	14.0565	-5.62368	6.28438e-08	0.034349	soil_type	soil_type	stained_soil	2.61101e-06	Proteobacteria	Gammaproteobacteria	Competibacterales	Competibacteraceae	Plasticicumulans
ASV835	12.3432	0.08003	0.00285516	5.60838	soil_type	soil_type	stained_soil	0.00710734	Verrucomicrobiota	Verrucomicrobiae	Verrucomicrobiales	Rubritaleaceae	Luteolibacter
ASV842	10.0402	-0.0862274	0.014455	0.27261	soil_type	soil_type	stained_soil	0.028993	Verrucomicrobiota	Verrucomicrobiae	Chthoniobacterales	Terrimicrobiaceae	Terrimicrobium
ASV845	17.2071	-0.14068	0.00117412	0.475777	soil_type	soil_type	stained_soil	0.00322651	Actinobacteriota	Actinobacteria	Frankiales	Geodermatophilaceae	Blastococcus
ASV846	19.2561	0.120531	8.41178e-06	5.78392	soil_type	soil_type	stained_soil	8.54303e-05	Proteobacteria	Alphaproteobacteria	Azospirillales	Azospirillaceae	Skermanella
ASV848	21.071	0.158203	4.11569e-07	7.13916	soil_type	soil_type	stained_soil	1.00775e-05	Proteobacteria	Gammaproteobacteria	Burkholderiales	Sutterellaceae	NA
ASV850	19.241	0.127965	1.98183e-06	8.31706	soil_type	soil_type	stained_soil	3.23205e-05	Actinobacteriota	Thermoleophilia	Gaiellales	Gaiellaceae	Gaiella
ASV851	18.867	-0.13207	2.69365e-05	0.136814	soil_type	soil_type	stained_soil	0.000193433	Proteobacteria	Alphaproteobacteria	Sphingomonadales	Sphingomonadaceae	Sphingomonas
ASV852	17.2623	-0.102696	0.00914705	0.568946	soil_type	soil_type	stained_soil	0.019633	Actinobacteriota	Actinobacteria	Propionibacteriales	Nocardioidaceae	Nocardioides
ASV863	11.0886	-0.127076	0.00189917	0.105971	soil_type	soil_type	stained_soil	0.00495373	Proteobacteria	Gammaproteobacteria	Xanthomonadales	Xanthomonadaceae	NA
ASV867	20.6359	0.131538	1.42242e-06	6.86055	soil_type	soil_type	stained_soil	2.40983e-05	Actinobacteriota	Thermoleophilia	Solirubrobacterales	67-14	NA
ASV869	20.2184	0.141643	3.15658e-05	2.84789	soil_type	soil_type	stained_soil	0.000223912	Gemmatimonadota	Gemmatimonadetes	Gemmatimonadales	Gemmatimonadaceae	Gemmatimonas
ASV878	19.4094	0.0625027	0.0154049	2.04472	soil_type	soil_type	stained_soil	0.0305126	Actinobacteriota	Actinobacteria	Pseudonocardiales	Pseudonocardiaceae	Pseudonocardia
ASV882	15.0503	-0.170428	2.30331e-05	0.0474396	soil_type	soil_type	stained_soil	0.00016959	Actinobacteriota	Actinobacteria	Propionibacteriales	Nocardioidaceae	Nocardioides
ASV889	19.6039	0.0739	0.000397877	4.347	soil_type	soil_type	stained_soil	0.00144045	Actinobacteriota	Actinobacteria	Micrococcales	Intrasporangiaceae	Intrasporangium
ASV892	19.5222	0.0719589	0.0270113	1.64708	soil_type	soil_type	stained_soil	0.0495633	Actinobacteriota	Actinobacteria	Propionibacteriales	Nocardioidaceae	NA
ASV894	20.1707	-0.681309	2.68141e-06	0.0241889	soil_type	soil_type	stained_soil	3.34219e-05	Actinobacteriota	Actinobacteria	Propionibacteriales	Nocardioidaceae	Nocardioides
ASV898	19.6843	0.154046	5.74148e-07	8.89474	soil_type	soil_type	stained_soil	1.16499e-05	Actinobacteriota	Actinobacteria	Propionibacteriales	Propionibacteriaceae	Microlunatus
ASV900	8.91983	-0.359439	1.38656e-05	0.0744665	soil_type	soil_type	stained_soil	0.000108989	Proteobacteria	Alphaproteobacteria	Rhizobiales	Rhizobiaceae	Allorhizobium-Neorhizobium-Pararhizobium-Rhizobium
ASV905	16.4164	0.135421	5.8545e-05	5.98931	soil_type	soil_type	stained_soil	0.000316152	Chloroflexi	Chloroflexia	Thermomicrobiales	AKYG1722	NA
ASV906	18.6901	0.141356	2.114e-06	9.91126	soil_type	soil_type	stained_soil	3.34219e-05	Actinobacteriota	Rubrobacteria	Rubrobacterales	Rubrobacteriaceae	Rubrobacter
ASV908	18.3511	-0.0893947	0.00168233	0.386106	soil_type	soil_type	stained_soil	0.00442124	Actinobacteriota	Actinobacteria	Micrococcales	Intrasporangiaceae	NA
ASV911	9.03017	0.099397	0.00460535	6.29449	soil_type	soil_type	stained_soil	0.0109041	Proteobacteria	Alphaproteobacteria	Rhizobiales	Rhizobiaceae	Mesorhizobium
ASV913	17.069	-0.162881	4.92093e-06	0.148689	soil_type	soil_type	stained_soil	5.43483e-05	Actinobacteriota	Thermoleophilia	Solirubrobacterales	Solirubrobacteraceae	Solirubrobacter
ASV919	14.9069	-1.50984	5.21499e-09	0.0324531	soil_type	soil_type	stained_soil	5.6876e-07	Actinobacteriota	Actinobacteria	Corynebacteriales	Mycobacteriaceae	Mycobacterium
ASV920	17.2365	-0.170585	1.34767e-06	0.0693469	soil_type	soil_type	stained_soil	2.35168e-05	Proteobacteria	Gammaproteobacteria	Burkholderiales	Nitrosomonadaceae	Nitrosospira
ASV922	19.5935	0.121404	0.00278866	1.83839	soil_type	soil_type	stained_soil	0.00697165	Actinobacteriota	Actinobacteria	Kineosporiales	Kineosporiaceae	NA
ASV924	17.0237	0.168352	3.93534e-05	3.63236	soil_type	soil_type	stained_soil	0.000267205	Actinobacteriota	Actinobacteria	Micromonosporales	Micromonosporaceae	Rhizocola
ASV926	19.1449	0.0669772	0.000410399	7.25894	soil_type	soil_type	stained_soil	0.00147964	Actinobacteriota	Rubrobacteria	Rubrobacterales	Rubrobacteriaceae	Rubrobacter
ASV928	16.9344	-0.0868315	0.0136954	0.517908	soil_type	soil_type	stained_soil	0.0278482	Actinobacteriota	Thermoleophilia	Solirubrobacterales	Solirubrobacteraceae	Solirubrobacter
ASV932	18.3137	-0.0595495	0.0111271	0.423166	soil_type	soil_type	stained_soil	0.0233094	Proteobacteria	Alphaproteobacteria	Rhizobiales	Xanthobacteraceae	Pseudolabrys
ASV933	8.85337	0.167821	0.00146333	9.73975	soil_type	soil_type	stained_soil	0.00391643	Chloroflexi	Chloroflexia	Chloroflexales	Herpetosiphonaceae	Herpetosiphon
ASV938	14.1416	0.292597	9.45273e-06	3.4838	soil_type	soil_type	stained_soil	9.37217e-05	Proteobacteria	Alphaproteobacteria	Rhizobiales	Rhizobiaceae	Ensifer
ASV939	15.4941	-1.11791	2.68141e-06	0.0312615	soil_type	soil_type	stained_soil	3.34219e-05	Actinobacteriota	Thermoleophilia	Solirubrobacterales	67-14	NA
ASV940	13.3244	0.209765	0.000381932	2.23345	soil_type	soil_type	stained_soil	0.00139935	Proteobacteria	Gammaproteobacteria	Xanthomonadales	Xanthomonadaceae	Lysobacter
ASV942	14.0835	0.172659	2.24563e-05	4.73968	soil_type	soil_type	stained_soil	0.00016675	Actinobacteriota	Thermoleophilia	Gaiellales	Gaiellaceae	Gaiella
ASV944	18.4604	0.204575	1.00999e-06	4.33249	soil_type	soil_type	stained_soil	1.85519e-05	Myxococcota	Polyangia	Haliangiales	Haliangiaceae	Haliangium
ASV946	17.8815	-0.0949709	0.000550924	0.255325	soil_type	soil_type	stained_soil	0.00167986	Actinobacteriota	Thermoleophilia	Solirubrobacterales	Solirubrobacteraceae	Solirubrobacter
ASV948	17.2606	0.300126	6.93152e-08	16.7276	soil_type	soil_type	stained_soil	2.81291e-06	Bacteroidota	Bacteroidia	Chitinophagales	Chitinophagaceae	Flavisolibacter
ASV954	15.7645	-0.068236	0.0240255	0.500813	soil_type	soil_type	stained_soil	0.0449351	Proteobacteria	Alphaproteobacteria	Sphingomonadales	Sphingomonadaceae	Sphingomonas
ASV961	14.2056	0.193504	0.00673885	17.7307	soil_type	soil_type	stained_soil	0.0151273	Proteobacteria	Gammaproteobacteria	Burkholderiales	Methylophilaceae	Methylobacillus
ASV964	9.4395	5.00134	0.000570862	19.879	soil_type	soil_type	stained_soil	0.00167986	Proteobacteria	Alphaproteobacteria	Rhizobiales	Methylopilaceae	Methylopila
ASV967	14.2015	0.0975323	0.000245714	6.27552	soil_type	soil_type	stained_soil	0.000954945	Actinobacteriota	Rubrobacteria	Rubrobacterales	Rubrobacteriaceae	Rubrobacter
ASV968	12.8189	-0.157214	3.6601e-05	0.103879	soil_type	soil_type	stained_soil	0.000251452	Bacteroidota	Bacteroidia	Cytophagales	Microscillaceae	NA
ASV970	15.1316	0.101799	0.000924307	4.6455	soil_type	soil_type	stained_soil	0.0025848	Chloroflexi	Chloroflexia	Thermomicrobiales	JG30-KF-CM45	NA
ASV973	14.3909	-0.115745	0.000475092	0.257777	soil_type	soil_type	stained_soil	0.00167144	Proteobacteria	Alphaproteobacteria	Rhizobiales	Xanthobacteraceae	NA
ASV974	16.2045	-1.57741	4.73557e-07	0.0299321	soil_type	soil_type	stained_soil	1.00775e-05	Proteobacteria	Gammaproteobacteria	Burkholderiales	Nitrosomonadaceae	966-1
ASV979	16.4722	-0.0640679	0.0027143	0.241905	soil_type	soil_type	stained_soil	0.00682486	Actinobacteriota	Actinobacteria	Frankiales	Sporichthyaceae	NA
ASV980	16.4807	-0.217244	5.27404e-06	0.0531007	soil_type	soil_type	stained_soil	5.71628e-05	Proteobacteria	Gammaproteobacteria	Burkholderiales	Rhodocyclaceae	Thauera
ASV982	18.2042	0.148509	1.44063e-05	4.12368	soil_type	soil_type	stained_soil	0.000112228	Actinobacteriota	Thermoleophilia	Gaiellales	Gaiellaceae	Gaiella
ASV985	14.547	-0.107522	0.0011227	0.163532	soil_type	soil_type	stained_soil	0.00309496	Bacteroidota	Bacteroidia	Chitinophagales	Saprospiraceae	NA
ASV993	16.5326	0.0959272	0.000449874	8.45186	soil_type	soil_type	stained_soil	0.00159559	Bacteroidota	Bacteroidia	Cytophagales	Microscillaceae	NA
ASV995	15.389	-0.18051	0.000477065	0.486633	soil_type	soil_type	stained_soil	0.00167278	Proteobacteria	Alphaproteobacteria	Sphingomonadales	Sphingomonadaceae	Sphingomonas
ASV996	14.2829	0.160278	0.000131861	12.3795	soil_type	soil_type	stained_soil	0.000644531	Proteobacteria	Gammaproteobacteria	Burkholderiales	Methylophilaceae	Methylotenera
ASV999	17.1518	-0.13019	2.25637e-05	0.149416	soil_type	soil_type	stained_soil	0.000166838	Actinobacteriota	Thermoleophilia	Solirubrobacterales	67-14	NA
ASV1000	8.88243	0.0784308	0.0124147	5.40234	soil_type	soil_type	stained_soil	0.0256071	Proteobacteria	Gammaproteobacteria	Xanthomonadales	Xanthomonadaceae	NA
ASV1002	13.6211	-2.50527	6.28438e-08	0.0354081	soil_type	soil_type	stained_soil	2.61101e-06	Proteobacteria	Alphaproteobacteria	Rhodobacterales	Rhodobacteraceae	Oceanicella
ASV1005	17.0714	0.0665715	0.0043373	3.4678	soil_type	soil_type	stained_soil	0.0103537	Acidobacteriota	Vicinamibacteria	Vicinamibacterales	Vicinamibacteraceae	NA
ASV1011	14.0288	0.0805656	0.00624198	2.86583	soil_type	soil_type	stained_soil	0.0141274	Chloroflexi	Chloroflexia	Thermomicrobiales	JG30-KF-CM45	NA
ASV1012	13.397	0.115729	0.00313871	2.72095	soil_type	soil_type	stained_soil	0.00776887	Proteobacteria	Gammaproteobacteria	Xanthomonadales	Xanthomonadaceae	Lysobacter
ASV1014	16.2484	-0.0608683	0.0131205	0.36679	soil_type	soil_type	stained_soil	0.0268094	Proteobacteria	Alphaproteobacteria	Acetobacterales	Acetobacteraceae	Roseomonas
ASV1015	14.2997	0.306567	2.42311e-07	7.52303	soil_type	soil_type	stained_soil	7.40603e-06	Bacteroidota	Bacteroidia	Chitinophagales	Chitinophagaceae	Parasegetibacter
ASV1023	12.2388	-0.118481	0.00419027	0.423235	soil_type	soil_type	stained_soil	0.0100717	Chloroflexi	Chloroflexia	Thermomicrobiales	JG30-KF-CM45	NA
ASV1026	14.0512	-1.09836	6.28438e-08	0.0343613	soil_type	soil_type	stained_soil	2.61101e-06	Actinobacteriota	Thermoleophilia	Gaiellales	Gaiellaceae	Gaiella
ASV1032	14.0927	-0.371012	3.76815e-07	0.0527855	soil_type	soil_type	stained_soil	1.00775e-05	Proteobacteria	Alphaproteobacteria	Tistrellales	Geminicoccaceae	NA
ASV1035	8.23233	-0.0951801	0.0107587	0.139522	soil_type	soil_type	stained_soil	0.0227012	Actinobacteriota	Actinobacteria	Micrococcales	Microbacteriaceae	NA
ASV1037	12.8986	0.236912	2.14011e-06	15.6643	soil_type	soil_type	stained_soil	3.34219e-05	Actinobacteriota	Actinobacteria	Propionibacteriales	Nocardioidaceae	Aeromicrobium
ASV1038	13.4766	0.0777352	0.00564648	3.40522	soil_type	soil_type	stained_soil	0.0129817	Chloroflexi	Chloroflexia	Thermomicrobiales	JG30-KF-CM45	NA
ASV1039	14.0947	0.138837	1.94382e-05	7.07651	soil_type	soil_type	stained_soil	0.000145578	Bacteroidota	Bacteroidia	Chitinophagales	Chitinophagaceae	Parafilimonas
ASV1040	16.1055	-0.752687	1.24343e-05	0.0301104	soil_type	soil_type	stained_soil	9.95311e-05	Actinobacteriota	Actinobacteria	Micrococcales	Micrococcaceae	Pseudarthrobacter
ASV1042	9.0614	-0.235625	3.95589e-05	0.0797115	soil_type	soil_type	stained_soil	0.000267559	Actinobacteriota	Actinobacteria	Propionibacteriales	Nocardioidaceae	Aeromicrobium
ASV1045	15.5278	-1.03969	4.73557e-07	0.0311958	soil_type	soil_type	stained_soil	1.00775e-05	Proteobacteria	Alphaproteobacteria	Dongiales	Dongiaceae	Dongia
ASV1049	15.5005	0.200796	1.6257e-06	12.9779	soil_type	soil_type	stained_soil	2.67627e-05	Verrucomicrobiota	Verrucomicrobiae	Pedosphaerales	Pedosphaeraceae	NA
ASV1051	16.2127	-0.0806858	0.00212324	0.238549	soil_type	soil_type	stained_soil	0.00547275	Proteobacteria	Alphaproteobacteria	Rhizobiales	Methyloligellaceae	NA
ASV1052	16.0758	-0.0699902	0.00463347	0.325976	soil_type	soil_type	stained_soil	0.0109558	Actinobacteriota	Thermoleophilia	Gaiellales	Gaiellaceae	Gaiella
ASV1054	14.6575	0.150387	3.46198e-05	4.16637	soil_type	soil_type	stained_soil	0.000240684	Actinobacteriota	Thermoleophilia	Solirubrobacterales	Solirubrobacteraceae	Solirubrobacter
ASV1055	14.9555	0.862224	1.24343e-05	30.9109	soil_type	soil_type	stained_soil	9.95311e-05	Actinobacteriota	Actinobacteria	Micrococcales	Intrasporangiaceae	Intrasporangium
ASV1056	12.4224	-0.123939	0.00433203	0.0756967	soil_type	soil_type	stained_soil	0.0103537	Proteobacteria	Gammaproteobacteria	Burkholderiales	Methylophilaceae	Methylotenera
ASV1057	15.3925	0.112937	0.000622654	2.92377	soil_type	soil_type	stained_soil	0.00182304	Actinobacteriota	Actinobacteria	Propionibacteriales	Nocardioidaceae	Nocardioides
ASV1058	13.4442	-0.983772	2.68141e-06	0.0358573	soil_type	soil_type	stained_soil	3.34219e-05	Actinobacteriota	Actinobacteria	Micromonosporales	Micromonosporaceae	Virgisporangium
ASV1060	13.2048	0.135803	0.00165489	2.28538	soil_type	soil_type	stained_soil	0.00436221	Actinobacteriota	Thermoleophilia	Solirubrobacterales	Solirubrobacteraceae	Parviterribacter
ASV1063	12.6847	0.202158	0.00231273	13.3808	soil_type	soil_type	stained_soil	0.00588296	Proteobacteria	Gammaproteobacteria	Burkholderiales	Rhodocyclaceae	NA
ASV1067	15.5329	0.209744	5.357e-08	10.3641	soil_type	soil_type	stained_soil	2.61101e-06	Actinobacteriota	Thermoleophilia	Gaiellales	Gaiellaceae	Gaiella
ASV1068	15.2141	0.11741	0.00110782	2.54934	soil_type	soil_type	stained_soil	0.00305877	Actinobacteriota	Thermoleophilia	Gaiellales	Gaiellaceae	Gaiella
ASV1071	14.5123	-0.130489	0.00125865	0.419551	soil_type	soil_type	stained_soil	0.00342644	Proteobacteria	Gammaproteobacteria	Burkholderiales	Nitrosomonadaceae	Nitrosospira
ASV1075	12.4732	-0.164549	0.000299848	0.129152	soil_type	soil_type	stained_soil	0.00113747	Actinobacteriota	Actinobacteria	Micrococcales	Intrasporangiaceae	Pedococcus-Phycicoccus
ASV1080	14.4606	-1.03881	6.28438e-08	0.033421	soil_type	soil_type	stained_soil	2.61101e-06	Actinobacteriota	Actinobacteria	Propionibacteriales	Nocardioidaceae	Nocardioides
ASV1081	15.6165	-0.101862	0.000515192	0.137716	soil_type	soil_type	stained_soil	0.00167986	Acidobacteriota	Vicinamibacteria	Vicinamibacterales	Vicinamibacteraceae	NA
ASV1084	12.1255	0.137152	0.00592306	1.91558	soil_type	soil_type	stained_soil	0.0135284	Actinobacteriota	Acidimicrobiia	Microtrichales	Ilumatobacteraceae	NA
ASV1092	13.2572	0.201095	0.00125566	1.85113	soil_type	soil_type	stained_soil	0.00342363	Actinobacteriota	Acidimicrobiia	Microtrichales	Ilumatobacteraceae	NA
ASV1095	11.5794	-0.1748	0.000422759	0.289234	soil_type	soil_type	stained_soil	0.00151481	Proteobacteria	Gammaproteobacteria	Xanthomonadales	Rhodanobacteraceae	Dokdonella
ASV1098	15.1399	0.187228	5.81547e-07	10.1041	soil_type	soil_type	stained_soil	1.16644e-05	Actinobacteriota	Actinobacteria	Propionibacteriales	Propionibacteriaceae	Microlunatus
ASV1101	12.4885	-0.195247	3.63065e-06	0.0947569	soil_type	soil_type	stained_soil	4.28074e-05	Proteobacteria	Alphaproteobacteria	Rhizobiales	Hyphomicrobiaceae	NA
ASV1105	12.4185	-1.34543	0.000570862	0.0387042	soil_type	soil_type	stained_soil	0.00167986	Actinobacteriota	Actinobacteria	Frankiales	Geodermatophilaceae	NA
ASV1113	13.0166	0.145027	5.23372e-05	5.95889	soil_type	soil_type	stained_soil	0.000290855	Actinobacteriota	Actinobacteria	Pseudonocardiales	Pseudonocardiaceae	Pseudonocardia
ASV1114	13.3609	0.12843	0.000525629	4.02721	soil_type	soil_type	stained_soil	0.00167986	Actinobacteriota	Actinobacteria	Pseudonocardiales	Pseudonocardiaceae	Pseudonocardia
ASV1120	11.3651	0.184883	2.49582e-05	7.83729	soil_type	soil_type	stained_soil	0.000181467	Chloroflexi	Chloroflexia	Thermomicrobiales	JG30-KF-CM45	NA
ASV1125	11.144	-3.84098	6.28438e-08	0.0429404	soil_type	soil_type	stained_soil	2.61101e-06	Chloroflexi	Chloroflexia	Thermomicrobiales	JG30-KF-CM45	NA
ASV1131	4.20273	0.467613	0.000454585	6.5391	soil_type	soil_type	stained_soil	0.00160903	Proteobacteria	Alphaproteobacteria	Rhizobiales	Xanthobacteraceae	Xanthobacter
ASV1133	12.2724	0.148218	0.000257134	4.02438	soil_type	soil_type	stained_soil	0.000994898	Acidobacteriota	Vicinamibacteria	Vicinamibacterales	Vicinamibacteraceae	NA
ASV1134	13.7043	2.53748	2.68141e-06	28.4086	soil_type	soil_type	stained_soil	3.34219e-05	Actinobacteriota	Actinobacteria	Micromonosporales	Micromonosporaceae	Hamadaea
ASV1143	13.3695	0.0652737	0.0101737	3.20211	soil_type	soil_type	stained_soil	0.0215975	Proteobacteria	Alphaproteobacteria	Azospirillales	Azospirillaceae	Skermanella
ASV1144	13.9455	-0.291	2.61685e-05	0.369117	soil_type	soil_type	stained_soil	0.000188695	Actinobacteriota	Thermoleophilia	Gaiellales	Gaiellaceae	Gaiella
ASV1145	15.0034	0.14422	5.15427e-05	9.00148	soil_type	soil_type	stained_soil	0.000287355	Acidobacteriota	Blastocatellia	Blastocatellales	Blastocatellaceae	NA
ASV1150	8.50727	0.11181	0.00445497	4.87388	soil_type	soil_type	stained_soil	0.0105768	Chloroflexi	Chloroflexia	Chloroflexales	Roseiflexaceae	NA
ASV1156	12.3858	-0.108012	0.00216315	0.349928	soil_type	soil_type	stained_soil	0.00555102	Actinobacteriota	Actinobacteria	Streptomycetales	Streptomycetaceae	Streptomyces
ASV1158	13.458	0.0647676	0.00613392	4.52304	soil_type	soil_type	stained_soil	0.0139402	Gemmatimonadota	Gemmatimonadetes	Gemmatimonadales	Gemmatimonadaceae	NA
ASV1160	13.0708	-0.115643	0.000330504	0.220248	soil_type	soil_type	stained_soil	0.00123762	Proteobacteria	Alphaproteobacteria	Caulobacterales	Hyphomonadaceae	SWB02
ASV1161	11.3468	0.193684	0.000104724	3.75499	soil_type	soil_type	stained_soil	0.000529689	Actinobacteriota	Actinobacteria	Frankiales	Geodermatophilaceae	NA
ASV1163	12.9942	0.170583	5.11609e-06	8.97996	soil_type	soil_type	stained_soil	5.57974e-05	Proteobacteria	Alphaproteobacteria	Tistrellales	Geminicoccaceae	Candidatus Alysiosphaera
ASV1166	13.2113	-8.54266	4.73557e-07	0.0364664	soil_type	soil_type	stained_soil	1.00775e-05	Proteobacteria	Gammaproteobacteria	Burkholderiales	SC-I-84	NA
ASV1167	13.3004	0.586694	4.79222e-08	19.844	soil_type	soil_type	stained_soil	2.61101e-06	Bacteroidota	Bacteroidia	Chitinophagales	Chitinophagaceae	Parafilimonas
ASV1171	9.21013	-0.100396	0.0105121	0.354686	soil_type	soil_type	stained_soil	0.0222347	Proteobacteria	Alphaproteobacteria	Rhizobiales	Hyphomicrobiaceae	Hyphomicrobium
ASV1175	12.3945	-0.11032	0.00675813	0.45257	soil_type	soil_type	stained_soil	0.0151273	Proteobacteria	Alphaproteobacteria	Defluviicoccales	Defluviicoccaceae	Defluviicoccus
ASV1177	12.9744	0.118917	0.000367368	5.41204	soil_type	soil_type	stained_soil	0.00135244	Proteobacteria	Alphaproteobacteria	Tistrellales	Geminicoccaceae	Candidatus Alysiosphaera
ASV1186	11.0085	0.0858471	0.0109575	3.28422	soil_type	soil_type	stained_soil	0.0230371	Chloroflexi	Chloroflexia	Chloroflexales	Roseiflexaceae	NA
ASV1191	12.8813	0.13298	0.000312415	4.45519	soil_type	soil_type	stained_soil	0.00118001	Proteobacteria	Gammaproteobacteria	Nitrosococcales	Nitrosococcaceae	SZB85
ASV1193	12.0273	0.0749513	0.0045571	4.71925	soil_type	soil_type	stained_soil	0.0108045	Actinobacteriota	Actinobacteria	Micromonosporales	Micromonosporaceae	Virgisporangium
ASV1197	12.6255	0.174202	4.00671e-05	4.8811	soil_type	soil_type	stained_soil	0.00026995	Proteobacteria	Gammaproteobacteria	Burkholderiales	Comamonadaceae	Ramlibacter
ASV1209	12.045	-0.0643937	0.013746	0.319152	soil_type	soil_type	stained_soil	0.0278592	Proteobacteria	Alphaproteobacteria	Defluviicoccales	Defluviicoccaceae	Defluviicoccus
ASV1210	10.2351	0.234769	4.30096e-05	13.723	soil_type	soil_type	stained_soil	0.000277678	Chloroflexi	Chloroflexia	Thermomicrobiales	JG30-KF-CM45	NA
ASV1213	11.6024	0.112576	0.00140434	4.22739	soil_type	soil_type	stained_soil	0.00377965	Proteobacteria	Alphaproteobacteria	Dongiales	Dongiaceae	Dongia
ASV1220	12.8508	0.102016	0.00115656	4.88153	soil_type	soil_type	stained_soil	0.00318329	Proteobacteria	Alphaproteobacteria	Tistrellales	Geminicoccaceae	NA
ASV1227	13.1661	-0.207158	6.16688e-05	0.0582643	soil_type	soil_type	stained_soil	0.000327088	Acidobacteriota	Vicinamibacteria	Vicinamibacterales	Vicinamibacteraceae	NA
ASV1235	12.2291	0.262755	5.29128e-07	11.213	soil_type	soil_type	stained_soil	1.11244e-05	Actinobacteriota	Actinobacteria	Pseudonocardiales	Pseudonocardiaceae	Pseudonocardia
ASV1237	9.42403	-0.673721	3.82951e-06	0.0551211	soil_type	soil_type	stained_soil	4.39637e-05	Actinobacteriota	Actinobacteria	Propionibacteriales	Nocardioidaceae	Nocardioides
ASV1244	11.4537	-0.662033	8.76807e-09	0.051738	soil_type	soil_type	stained_soil	8.05278e-07	Actinobacteriota	Actinobacteria	Micrococcales	Intrasporangiaceae	NA
ASV1248	8.42467	0.225208	0.000549849	10.0316	soil_type	soil_type	stained_soil	0.00167986	Chloroflexi	Chloroflexia	Thermomicrobiales	JG30-KF-CM45	NA
ASV1249	12.87	-0.328278	7.79442e-06	0.0524983	soil_type	soil_type	stained_soil	8.14447e-05	Acidobacteriota	Blastocatellia	Pyrinomonadales	Pyrinomonadaceae	RB41
ASV1251	8.1787	-0.0879295	0.0126552	0.234819	soil_type	soil_type	stained_soil	0.0260109	Proteobacteria	Alphaproteobacteria	Rhizobiales	Devosiaceae	NA
ASV1254	10.5603	0.215324	4.0539e-05	5.05706	soil_type	soil_type	stained_soil	0.000271281	Actinobacteriota	Actinobacteria	Propionibacteriales	Nocardioidaceae	Nocardioides
ASV1257	12.4792	-1.20576	4.73557e-07	0.0385232	soil_type	soil_type	stained_soil	1.00775e-05	Actinobacteriota	Actinobacteria	Propionibacteriales	Nocardioidaceae	Nocardioides
ASV1262	11.22	0.300333	8.25748e-08	7.83012	soil_type	soil_type	stained_soil	3.06581e-06	Actinobacteriota	Actinobacteria	Propionibacteriales	Nocardioidaceae	Nocardioides
ASV1274	12.3418	0.0476853	0.0192009	6.51356	soil_type	soil_type	stained_soil	0.0372284	Acidobacteriota	Blastocatellia	Pyrinomonadales	Pyrinomonadaceae	RB41
ASV1275	12.3989	-1.14765	2.68141e-06	0.0387629	soil_type	soil_type	stained_soil	3.34219e-05	Proteobacteria	Alphaproteobacteria	Rhizobiales	Xanthobacteraceae	Pseudolabrys
ASV1277	12.1563	-0.0996807	0.00109963	0.178137	soil_type	soil_type	stained_soil	0.00304099	Actinobacteriota	Acidimicrobiia	Microtrichales	Ilumatobacteraceae	NA
ASV1279	8.78867	0.103733	0.0108768	3.04764	soil_type	soil_type	stained_soil	0.0228951	Proteobacteria	Alphaproteobacteria	Rhizobiales	Rhizobiaceae	Phyllobacterium
ASV1284	10.4775	-0.0629677	0.0112744	0.144739	soil_type	soil_type	stained_soil	0.0235898	Proteobacteria	Alphaproteobacteria	Rhizobiales	Xanthobacteraceae	Pseudolabrys
ASV1287	9.8142	-1.69449	2.68141e-06	0.0484769	soil_type	soil_type	stained_soil	3.34219e-05	Actinobacteriota	Actinobacteria	Pseudonocardiales	Pseudonocardiaceae	Pseudonocardia
ASV1289	10.9991	0.242062	5.70755e-06	6.75271	soil_type	soil_type	stained_soil	6.14795e-05	Actinobacteriota	Actinobacteria	Propionibacteriales	Nocardioidaceae	Nocardioides
ASV1290	10.5039	-2.36664	2.68141e-06	0.0454383	soil_type	soil_type	stained_soil	3.34219e-05	Actinobacteriota	Thermoleophilia	Solirubrobacterales	Solirubrobacteraceae	Solirubrobacter
ASV1292	9.0049	-0.0943492	0.0159812	0.357566	soil_type	soil_type	stained_soil	0.0315813	Actinobacteriota	Actinobacteria	Propionibacteriales	Nocardioidaceae	Nocardioides
ASV1298	10.6313	-0.247444	3.51441e-06	0.091888	soil_type	soil_type	stained_soil	4.17187e-05	Proteobacteria	Alphaproteobacteria	Rhizobiales	Hyphomicrobiaceae	Pedomicrobium
ASV1299	10.5223	1.05127	8.21301e-10	11.89	soil_type	soil_type	stained_soil	5.6876e-07	Bacteroidota	Bacteroidia	Chitinophagales	Chitinophagaceae	Aurantisolimonas
ASV1301	11.9092	0.116914	0.000194036	6.86509	soil_type	soil_type	stained_soil	0.000773042	Actinobacteriota	Thermoleophilia	Gaiellales	Gaiellaceae	Gaiella
ASV1312	9.2666	-0.608025	0.000570862	0.0511949	soil_type	soil_type	stained_soil	0.00167986	Actinobacteriota	Actinobacteria	Propionibacteriales	Nocardioidaceae	Nocardioides
ASV1313	10.6788	-0.275219	2.98197e-06	0.114928	soil_type	soil_type	stained_soil	3.63883e-05	Acidobacteriota	Blastocatellia	Pyrinomonadales	Pyrinomonadaceae	RB41
ASV1314	10.4744	0.138111	0.000185547	5.67067	soil_type	soil_type	stained_soil	0.000740916	Proteobacteria	Alphaproteobacteria	Tistrellales	Geminicoccaceae	Candidatus Alysiosphaera
ASV1315	7.01053	-1.7466	1.24343e-05	0.0665732	soil_type	soil_type	stained_soil	9.95311e-05	Proteobacteria	Alphaproteobacteria	Reyranellales	Reyranellaceae	NA
ASV1321	3.6727	0.368491	0.00164462	6.51842	soil_type	soil_type	stained_soil	0.00434826	Proteobacteria	Gammaproteobacteria	Xanthomonadales	Xanthomonadaceae	Luteimonas
ASV1322	10.3824	-0.200914	0.00371292	0.525282	soil_type	soil_type	stained_soil	0.00899868	Proteobacteria	Alphaproteobacteria	Rhodobacterales	Rhodobacteraceae	NA
ASV1323	10.0569	-0.117561	0.00360724	0.1707	soil_type	soil_type	stained_soil	0.00879139	Proteobacteria	Gammaproteobacteria	Burkholderiales	Methylophilaceae	Methylophilus
ASV1324	11.053	-0.0970378	0.0141618	0.466258	soil_type	soil_type	stained_soil	0.0285693	Actinobacteriota	Actinobacteria	Propionibacteriales	Nocardioidaceae	Nocardioides
ASV1326	10.5403	0.16627	0.0170083	1.60831	soil_type	soil_type	stained_soil	0.0334228	Proteobacteria	Gammaproteobacteria	Burkholderiales	TRA3-20	NA
ASV1331	9.81737	0.0925605	0.01498	2.57922	soil_type	soil_type	stained_soil	0.0298744	Actinobacteriota	Actinobacteria	Micromonosporales	Micromonosporaceae	Luedemannella
ASV1336	9.3819	3.88739	0.000570862	19.7638	soil_type	soil_type	stained_soil	0.00167986	Proteobacteria	Gammaproteobacteria	Burkholderiales	Methylophilaceae	NA
ASV1340	12.0809	-0.192812	1.30141e-05	0.0722575	soil_type	soil_type	stained_soil	0.000102759	Proteobacteria	Gammaproteobacteria	Burkholderiales	Nitrosomonadaceae	MND1
ASV1342	10.1111	0.0815966	0.00676176	5.99838	soil_type	soil_type	stained_soil	0.0151273	Actinobacteriota	Actinobacteria	Micromonosporales	Micromonosporaceae	Hamadaea
ASV1347	10.4842	-0.112419	0.0145597	0.508204	soil_type	soil_type	stained_soil	0.0291696	Actinobacteriota	Actinobacteria	Streptomycetales	Streptomycetaceae	Streptomyces
ASV1351	6.8363	0.132294	0.00849335	6.50891	soil_type	soil_type	stained_soil	0.0184569	Chloroflexi	Chloroflexia	Chloroflexales	Herpetosiphonaceae	Herpetosiphon
ASV1359	11.0063	-1.58304	6.28438e-08	0.0434543	soil_type	soil_type	stained_soil	2.61101e-06	Actinobacteriota	Actinobacteria	Pseudonocardiales	Pseudonocardiaceae	Pseudonocardia
ASV1360	10.1273	-0.272949	1.48411e-05	0.175683	soil_type	soil_type	stained_soil	0.000113586	Proteobacteria	Alphaproteobacteria	Rhodobacterales	Rhodobacteraceae	Amaricoccus
ASV1367	10.205	-0.115324	0.00327309	0.345465	soil_type	soil_type	stained_soil	0.00806716	Proteobacteria	Gammaproteobacteria	Burkholderiales	Burkholderiaceae	Limnobacter
ASV1368	8.5445	0.218987	6.3939e-05	8.74293	soil_type	soil_type	stained_soil	0.000336065	Actinobacteriota	Actinobacteria	Micrococcales	Microbacteriaceae	Microbacterium
ASV1369	5.93633	0.603516	3.17743e-06	7.11742	soil_type	soil_type	stained_soil	3.84518e-05	Proteobacteria	Gammaproteobacteria	Xanthomonadales	Xanthomonadaceae	Lysobacter
ASV1371	5.7607	1.23123	0.000570862	12.5214	soil_type	soil_type	stained_soil	0.00167986	Verrucomicrobiota	Verrucomicrobiae	Verrucomicrobiales	Rubritaleaceae	Luteolibacter
ASV1374	9.45737	0.103314	0.00559016	3.15458	soil_type	soil_type	stained_soil	0.0129032	Actinobacteriota	Actinobacteria	Micromonosporales	Micromonosporaceae	Micromonospora
ASV1375	10.5583	3.01321	1.24343e-05	22.1166	soil_type	soil_type	stained_soil	9.95311e-05	Verrucomicrobiota	Verrucomicrobiae	Pedosphaerales	Pedosphaeraceae	Ellin517
ASV1378	11.0277	-1.5991	4.73557e-07	0.0433737	soil_type	soil_type	stained_soil	1.00775e-05	Actinobacteriota	Actinobacteria	Frankiales	Geodermatophilaceae	Blastococcus
ASV1380	10.3595	-5.4021	6.28438e-08	0.0460426	soil_type	soil_type	stained_soil	2.61101e-06	Proteobacteria	Gammaproteobacteria	Burkholderiales	Nitrosomonadaceae	966-1
ASV1381	8.04443	-1.74383	2.68141e-06	0.0585176	soil_type	soil_type	stained_soil	3.34219e-05	Actinobacteriota	Acidimicrobiia	Microtrichales	Iamiaceae	Iamia
ASV1388	10.6656	-0.161163	0.000276113	0.241005	soil_type	soil_type	stained_soil	0.00105894	Proteobacteria	Alphaproteobacteria	Reyranellales	Reyranellaceae	NA
ASV1398	10.1196	-0.265123	1.58077e-06	0.0982824	soil_type	soil_type	stained_soil	2.6517e-05	Actinobacteriota	Thermoleophilia	Solirubrobacterales	67-14	NA
ASV1400	11.4266	-0.814876	4.96479e-05	0.0419232	soil_type	soil_type	stained_soil	0.000277678	Proteobacteria	Gammaproteobacteria	Burkholderiales	Nitrosomonadaceae	Ellin6067
ASV1405	6.73603	0.170281	0.0219007	8.83436	soil_type	soil_type	stained_soil	0.0415851	Deinococcota	Deinococci	Deinococcales	Trueperaceae	Truepera
ASV1406	9.37223	0.148689	0.001551	4.01559	soil_type	soil_type	stained_soil	0.00412576	Chloroflexi	Chloroflexia	Chloroflexales	Roseiflexaceae	NA
ASV1411	10.3746	-0.492617	1.22317e-05	0.0626429	soil_type	soil_type	stained_soil	9.95311e-05	Proteobacteria	Alphaproteobacteria	Rhizobiales	Rhizobiales Incertae Sedis	Nordella
ASV1412	8.1026	-0.202773	0.00109272	0.227863	soil_type	soil_type	stained_soil	0.00302665	Actinobacteriota	Actinobacteria	Micromonosporales	Micromonosporaceae	NA
ASV1417	8.29303	-0.204468	0.000143544	0.258485	soil_type	soil_type	stained_soil	0.00069259	Proteobacteria	Alphaproteobacteria	Rhizobiales	Rhizobiales Incertae Sedis	Nordella
ASV1418	10.1176	0.152694	0.000226038	4.74769	soil_type	soil_type	stained_soil	0.00088837	Proteobacteria	Gammaproteobacteria	Burkholderiales	Sutterellaceae	NA
ASV1420	5.9152	-0.37615	7.07276e-05	0.296632	soil_type	soil_type	stained_soil	0.00036732	Proteobacteria	Alphaproteobacteria	Rhizobiales	Rhizobiaceae	Pseudaminobacter
ASV1421	8.3038	0.0890376	0.0119761	3.90612	soil_type	soil_type	stained_soil	0.0248789	Actinobacteriota	Actinobacteria	Pseudonocardiales	Pseudonocardiaceae	Pseudonocardia
ASV1427	7.37107	-0.10089	0.0168201	0.344649	soil_type	soil_type	stained_soil	0.0330904	Actinobacteriota	Actinobacteria	Micrococcales	Promicromonosporaceae	Promicromonospora
ASV1428	9.12987	-2.61178	4.96479e-05	0.0519218	soil_type	soil_type	stained_soil	0.000277678	Actinobacteriota	Thermoleophilia	Solirubrobacterales	67-14	NA
ASV1433	7.88517	0.191043	0.000402451	4.96013	soil_type	soil_type	stained_soil	0.00145399	Chloroflexi	Chloroflexia	Thermomicrobiales	JG30-KF-CM45	NA
ASV1435	10.6982	0.206935	0.000335384	13.0581	soil_type	soil_type	stained_soil	0.0012532	Proteobacteria	Gammaproteobacteria	Burkholderiales	Methylophilaceae	Methylotenera
ASV1437	9.60547	-0.401715	6.10019e-07	0.0569249	soil_type	soil_type	stained_soil	1.19605e-05	Actinobacteriota	Thermoleophilia	Solirubrobacterales	67-14	NA
ASV1440	7.42267	-0.275303	4.2696e-05	0.108289	soil_type	soil_type	stained_soil	0.000277678	Gemmatimonadota	Gemmatimonadetes	Gemmatimonadales	Gemmatimonadaceae	Gemmatimonas
ASV1441	8.90933	-0.238672	5.50443e-05	0.0859067	soil_type	soil_type	stained_soil	0.000301104	Acidobacteriota	Vicinamibacteria	Vicinamibacterales	Vicinamibacteraceae	NA
ASV1444	9.0008	-0.272092	1.47583e-05	0.102037	soil_type	soil_type	stained_soil	0.00011345	Proteobacteria	Alphaproteobacteria	Rhizobiales	Hyphomicrobiaceae	Pedomicrobium
ASV1445	9.51873	0.232777	3.74673e-05	3.88811	soil_type	soil_type	stained_soil	0.000256394	Acidobacteriota	Vicinamibacteria	Vicinamibacterales	Vicinamibacteraceae	NA
ASV1446	9.75187	-1.56371	4.73557e-07	0.0487716	soil_type	soil_type	stained_soil	1.00775e-05	Gemmatimonadota	Gemmatimonadetes	Gemmatimonadales	Gemmatimonadaceae	NA
ASV1450	8.59503	-1.62491	1.24343e-05	0.0549751	soil_type	soil_type	stained_soil	9.95311e-05	Proteobacteria	Alphaproteobacteria	Rhodobacterales	Rhodobacteraceae	Amaricoccus
ASV1451	9.77467	0.211958	0.000179616	3.19041	soil_type	soil_type	stained_soil	0.000718875	Gemmatimonadota	Gemmatimonadetes	Gemmatimonadales	Gemmatimonadaceae	Roseisolibacter
ASV1453	9.07373	-1.47952	2.68141e-06	0.0522262	soil_type	soil_type	stained_soil	3.34219e-05	Actinobacteriota	Actinobacteria	Micrococcales	Intrasporangiaceae	NA
ASV1466	8.7598	-0.134102	0.0150483	0.503636	soil_type	soil_type	stained_soil	0.0299764	Actinobacteriota	Actinobacteria	Streptomycetales	Streptomycetaceae	NA
ASV1467	9.34727	-1.2386	4.73557e-07	0.0507755	soil_type	soil_type	stained_soil	1.00775e-05	Proteobacteria	Alphaproteobacteria	Rhodobacterales	Rhodobacteraceae	NA
ASV1468	3.2261	0.285587	0.00613529	3.95711	soil_type	soil_type	stained_soil	0.0139402	Actinobacteriota	Actinobacteria	Corynebacteriales	Nocardiaceae	Williamsia
ASV1470	9.7551	0.256954	3.19514e-06	6.18188	soil_type	soil_type	stained_soil	3.84518e-05	Bacteroidota	Bacteroidia	Chitinophagales	Chitinophagaceae	Parafilimonas
ASV1471	10.8907	0.0857448	0.00368	5.11307	soil_type	soil_type	stained_soil	0.0089313	Actinobacteriota	Actinobacteria	Micromonosporales	Micromonosporaceae	NA
ASV1475	9.0073	0.161698	0.000330045	4.11813	soil_type	soil_type	stained_soil	0.00123762	Proteobacteria	Alphaproteobacteria	Acetobacterales	Acetobacteraceae	NA
ASV1478	10.651	-0.323332	6.99929e-07	0.0936514	soil_type	soil_type	stained_soil	1.35708e-05	Actinobacteriota	Thermoleophilia	Solirubrobacterales	Solirubrobacteraceae	Solirubrobacter
ASV1480	9.32643	-0.127772	0.00288711	0.272731	soil_type	soil_type	stained_soil	0.00717665	Actinobacteriota	Actinobacteria	Micrococcales	Micrococcaceae	NA
ASV1481	4.49223	-0.213652	0.0252987	0.527346	soil_type	soil_type	stained_soil	0.0470642	Proteobacteria	Alphaproteobacteria	Sphingomonadales	Sphingomonadaceae	Altererythrobacter
ASV1482	10.676	0.151173	0.000357018	4.85498	soil_type	soil_type	stained_soil	0.00131991	Proteobacteria	Gammaproteobacteria	Steroidobacterales	Steroidobacteraceae	Steroidobacter
ASV1489	8.8721	-2.85144	6.28438e-08	0.0533498	soil_type	soil_type	stained_soil	2.61101e-06	Actinobacteriota	Thermoleophilia	Gaiellales	Gaiellaceae	Gaiella
ASV1490	10.4848	0.102036	0.0106485	2.7942	soil_type	soil_type	stained_soil	0.0224959	Verrucomicrobiota	Verrucomicrobiae	Pedosphaerales	Pedosphaeraceae	NA
ASV1491	9.93667	0.123561	0.00282086	3.58836	soil_type	soil_type	stained_soil	0.007032	Gemmatimonadota	Gemmatimonadetes	Gemmatimonadales	Gemmatimonadaceae	NA
ASV1509	9.5257	0.231294	5.453e-05	12.8066	soil_type	soil_type	stained_soil	0.000300666	Actinobacteriota	Actinobacteria	Pseudonocardiales	Pseudonocardiaceae	Actinomycetospora
ASV1510	7.5565	-0.171678	0.000644786	0.132002	soil_type	soil_type	stained_soil	0.00188152	Actinobacteriota	Thermoleophilia	Solirubrobacterales	Solirubrobacteraceae	Solirubrobacter
ASV1512	8.80127	0.986316	0.000176392	18.6025	soil_type	soil_type	stained_soil	0.000709227	Actinobacteriota	Actinobacteria	Micromonosporales	Micromonosporaceae	NA
ASV1521	7.42597	-0.147169	0.00631674	0.167522	soil_type	soil_type	stained_soil	0.0142781	Proteobacteria	Gammaproteobacteria	Xanthomonadales	Rhodanobacteraceae	NA
ASV1522	9.53743	0.111378	0.00753946	2.82433	soil_type	soil_type	stained_soil	0.0166326	Proteobacteria	Gammaproteobacteria	Burkholderiales	Nitrosomonadaceae	mle1-7
ASV1523	9.3644	-0.1511	0.00141148	0.288271	soil_type	soil_type	stained_soil	0.00378927	Proteobacteria	Alphaproteobacteria	Defluviicoccales	Defluviicoccaceae	Defluviicoccus
ASV1524	9.57187	0.245978	3.71808e-06	8.74845	soil_type	soil_type	stained_soil	4.3544e-05	Gemmatimonadota	Gemmatimonadetes	Gemmatimonadales	Gemmatimonadaceae	NA
ASV1526	9.7158	-0.173337	0.000445243	0.296831	soil_type	soil_type	stained_soil	0.00158238	Actinobacteriota	Thermoleophilia	Solirubrobacterales	Solirubrobacteraceae	Solirubrobacter
ASV1527	8.35153	0.247654	2.51989e-05	5.6087	soil_type	soil_type	stained_soil	0.000182456	Actinobacteriota	Acidimicrobiia	Microtrichales	Ilumatobacteraceae	NA
ASV1531	6.36463	-1.32374	0.000570862	0.0728371	soil_type	soil_type	stained_soil	0.00167986	Proteobacteria	Alphaproteobacteria	Reyranellales	Reyranellaceae	NA
ASV1536	10.1093	-0.133424	0.00342601	0.0942137	soil_type	soil_type	stained_soil	0.00840842	Proteobacteria	Gammaproteobacteria	Burkholderiales	Methylophilaceae	Methylotenera
ASV1544	6.32587	-0.261179	0.000244631	0.190224	soil_type	soil_type	stained_soil	0.000954707	Actinobacteriota	Actinobacteria	Micrococcales	Microbacteriaceae	Agromyces
ASV1547	7.6685	-0.427936	0.0013398	0.0728297	soil_type	soil_type	stained_soil	0.00361912	Actinobacteriota	Actinobacteria	Propionibacteriales	Nocardioidaceae	Nocardioides
ASV1548	7.58803	-0.4195	2.51307e-06	0.210747	soil_type	soil_type	stained_soil	3.34219e-05	Proteobacteria	Alphaproteobacteria	Defluviicoccales	Defluviicoccaceae	Defluviicoccus
ASV1549	8.12433	-0.146622	0.000808739	0.195719	soil_type	soil_type	stained_soil	0.00228728	Actinobacteriota	Acidimicrobiia	Microtrichales	Ilumatobacteraceae	NA
ASV1551	9.77853	0.0997922	0.0149074	2.39367	soil_type	soil_type	stained_soil	0.0297636	Verrucomicrobiota	Verrucomicrobiae	Pedosphaerales	Pedosphaeraceae	NA
ASV1552	10.1591	-0.262425	3.23389e-05	0.0669174	soil_type	soil_type	stained_soil	0.000227779	Proteobacteria	Alphaproteobacteria	Rhizobiales	Amb-16S-1323	NA
ASV1555	8.60767	1.1365	1.24343e-05	18.2153	soil_type	soil_type	stained_soil	9.95311e-05	Proteobacteria	Alphaproteobacteria	Rhizobiales	Xanthobacteraceae	NA
ASV1560	8.1911	0.192474	0.000328627	3.96289	soil_type	soil_type	stained_soil	0.00123589	Actinobacteriota	Actinobacteria	Pseudonocardiales	Pseudonocardiaceae	Pseudonocardia
ASV1564	7.46867	-0.399803	0.000203554	0.467181	soil_type	soil_type	stained_soil	0.000807276	Proteobacteria	Alphaproteobacteria	Rhizobiales	Beijerinckiaceae	Microvirga
ASV1565	8.3093	0.486156	2.75463e-07	10.3588	soil_type	soil_type	stained_soil	8.01138e-06	Proteobacteria	Gammaproteobacteria	Burkholderiales	SC-I-84	NA
ASV1566	6.5375	-0.211785	0.000349959	0.170753	soil_type	soil_type	stained_soil	0.00129931	Firmicutes	Bacilli	Bacillales	Bacillaceae	Bacillus
ASV1573	7.1602	-3.57778	1.24343e-05	0.0652724	soil_type	soil_type	stained_soil	9.95311e-05	Actinobacteriota	Actinobacteria	Propionibacteriales	Nocardioidaceae	Nocardioides
ASV1574	5.95687	0.0907813	0.0228084	4.71719	soil_type	soil_type	stained_soil	0.0430134	Proteobacteria	Alphaproteobacteria	Sphingomonadales	Sphingomonadaceae	Sphingomonas
ASV1576	6.27587	-0.167916	0.00351901	0.161568	soil_type	soil_type	stained_soil	0.00860038	Proteobacteria	Alphaproteobacteria	Rhizobiales	Rhizobiaceae	Mesorhizobium
ASV1579	9.51187	-0.0670158	0.0216625	0.231422	soil_type	soil_type	stained_soil	0.0412226	Bacteroidota	Bacteroidia	Chitinophagales	Chitinophagaceae	NA
ASV1582	7.73123	-0.117477	0.00948592	0.276882	soil_type	soil_type	stained_soil	0.0203103	Actinobacteriota	Actinobacteria	Micromonosporales	Micromonosporaceae	NA
ASV1605	7.16863	-0.183229	0.026923	0.2395	soil_type	soil_type	stained_soil	0.0494533	Actinobacteriota	Actinobacteria	Propionibacteriales	Nocardioidaceae	Nocardioides
ASV1606	8.61213	0.444314	8.17187e-07	14.8546	soil_type	soil_type	stained_soil	1.56702e-05	Bacteroidota	Bacteroidia	Chitinophagales	Chitinophagaceae	Flavisolibacter
ASV1613	8.07837	-0.170488	0.000702972	0.125078	soil_type	soil_type	stained_soil	0.00201758	Proteobacteria	Alphaproteobacteria	Rhizobiales	Hyphomicrobiaceae	NA
ASV1615	8.3379	-2.48131	4.96479e-05	0.0565745	soil_type	soil_type	stained_soil	0.000277678	Actinobacteriota	Thermoleophilia	Solirubrobacterales	67-14	NA
ASV1619	7.32493	-5.93793	5.21499e-09	0.0638983	soil_type	soil_type	stained_soil	5.6876e-07	Chloroflexi	Chloroflexia	Thermomicrobiales	JG30-KF-CM45	NA
ASV1623	8.75583	0.267261	5.74508e-06	5.83437	soil_type	soil_type	stained_soil	6.1504e-05	Proteobacteria	Alphaproteobacteria	Rhodobacterales	Rhodobacteraceae	Amaricoccus
ASV1624	8.0214	0.156943	0.00228428	5.71002	soil_type	soil_type	stained_soil	0.00582758	Bacteroidota	Bacteroidia	Chitinophagales	Chitinophagaceae	Terrimonas
ASV1625	9.28827	0.111744	0.00142484	5.2629	soil_type	soil_type	stained_soil	0.00381926	Proteobacteria	Alphaproteobacteria	Tistrellales	Geminicoccaceae	NA
ASV1636	7.31263	-2.00432	2.68141e-06	0.0639989	soil_type	soil_type	stained_soil	3.34219e-05	Nitrospirota	Nitrospiria	Nitrospirales	Nitrospiraceae	Nitrospira
ASV1639	6.9234	-1.57454	0.000176392	0.0673546	soil_type	soil_type	stained_soil	0.000709227	Actinobacteriota	Actinobacteria	Micromonosporales	Micromonosporaceae	Virgisporangium
ASV1640	8.8299	0.30122	7.97298e-06	4.88065	soil_type	soil_type	stained_soil	8.28146e-05	Proteobacteria	Alphaproteobacteria	Tistrellales	Geminicoccaceae	Candidatus Alysiosphaera
ASV1642	6.80973	-2.0376	0.000176392	0.0684019	soil_type	soil_type	stained_soil	0.000709227	Gemmatimonadota	Gemmatimonadetes	Gemmatimonadales	Gemmatimonadaceae	NA
ASV1646	7.0856	0.355388	4.385e-06	9.54827	soil_type	soil_type	stained_soil	4.87377e-05	Gemmatimonadota	Gemmatimonadetes	Gemmatimonadales	Gemmatimonadaceae	Gemmatimonas
ASV1647	7.9866	0.317559	2.80539e-05	12.7838	soil_type	soil_type	stained_soil	0.000200632	Acidobacteriota	Vicinamibacteria	Vicinamibacterales	Vicinamibacteraceae	Luteitalea
ASV1657	5.08027	0.297097	0.000245105	5.62772	soil_type	soil_type	stained_soil	0.000954707	Actinobacteriota	Actinobacteria	Micromonosporales	Micromonosporaceae	Actinoplanes
ASV1666	8.41413	0.147255	0.00075592	4.72589	soil_type	soil_type	stained_soil	0.00215889	Actinobacteriota	Thermoleophilia	Solirubrobacterales	Solirubrobacteraceae	Solirubrobacter
ASV1670	7.9859	-1.15565	0.000176392	0.0589213	soil_type	soil_type	stained_soil	0.000709227	Actinobacteriota	Thermoleophilia	Solirubrobacterales	67-14	NA
ASV1674	8.06543	-0.0741186	0.019877	0.159238	soil_type	soil_type	stained_soil	0.0383264	Actinobacteriota	Thermoleophilia	Solirubrobacterales	67-14	NA
ASV1676	8.59703	0.120829	0.00140573	5.70153	soil_type	soil_type	stained_soil	0.00377965	Proteobacteria	Gammaproteobacteria	Steroidobacterales	Steroidobacteraceae	NA
ASV1684	7.85883	-0.976817	4.96479e-05	0.059817	soil_type	soil_type	stained_soil	0.000277678	Actinobacteriota	Actinobacteria	Frankiales	Geodermatophilaceae	NA
ASV1689	8.1346	-0.110336	0.0175265	0.414521	soil_type	soil_type	stained_soil	0.0343253	Proteobacteria	Gammaproteobacteria	Steroidobacterales	Woeseiaceae	Woeseia
ASV1691	8.3357	-1.44633	1.24343e-05	0.0565886	soil_type	soil_type	stained_soil	9.95311e-05	Acidobacteriota	Blastocatellia	Pyrinomonadales	Pyrinomonadaceae	RB41
ASV1702	8.04073	0.142821	0.00293075	3.37088	soil_type	soil_type	stained_soil	0.00727478	Acidobacteriota	Vicinamibacteria	Vicinamibacterales	Vicinamibacteraceae	NA
ASV1703	8.89493	0.170369	0.000919912	10.7104	soil_type	soil_type	stained_soil	0.00257664	Proteobacteria	Gammaproteobacteria	Burkholderiales	Comamonadaceae	NA
ASV1706	8.00267	0.147289	0.000796247	6.06147	soil_type	soil_type	stained_soil	0.00226664	Proteobacteria	Alphaproteobacteria	Azospirillales	Azospirillaceae	Skermanella
ASV1716	7.46357	0.299193	5.26772e-05	5.81593	soil_type	soil_type	stained_soil	0.000291815	Chloroflexi	Chloroflexia	Thermomicrobiales	JG30-KF-CM45	NA
ASV1719	6.66293	-0.297496	0.00595988	0.0936736	soil_type	soil_type	stained_soil	0.0135948	Actinobacteriota	Actinobacteria	Corynebacteriales	Mycobacteriaceae	Mycobacterium
ASV1720	8.10677	0.207445	0.00056983	3.54815	soil_type	soil_type	stained_soil	0.00167986	Actinobacteriota	Actinobacteria	Micromonosporales	Micromonosporaceae	Luedemannella
ASV1723	8.7568	3.20934	4.73557e-07	18.5136	soil_type	soil_type	stained_soil	1.00775e-05	Acidobacteriota	Vicinamibacteria	Vicinamibacterales	Vicinamibacteraceae	NA
ASV1725	6.12153	-0.544141	0.0116439	0.0903811	soil_type	soil_type	stained_soil	0.0242754	Proteobacteria	Gammaproteobacteria	Xanthomonadales	Xanthomonadaceae	NA
ASV1727	7.7667	0.190277	0.000855863	3.09531	soil_type	soil_type	stained_soil	0.00240884	Actinobacteriota	Thermoleophilia	Solirubrobacterales	Solirubrobacteraceae	Solirubrobacter
ASV1735	9.2019	-10.3765	2.68141e-06	0.0515363	soil_type	soil_type	stained_soil	3.34219e-05	Proteobacteria	Gammaproteobacteria	Burkholderiales	Nitrosomonadaceae	oc32
ASV1740	8.70693	0.0999549	0.00982577	3.29681	soil_type	soil_type	stained_soil	0.0209608	Gemmatimonadota	Gemmatimonadetes	Gemmatimonadales	Gemmatimonadaceae	NA
ASV1744	4.95503	0.195851	0.00169732	5.69983	soil_type	soil_type	stained_soil	0.00444718	Actinobacteriota	Actinobacteria	Propionibacteriales	Nocardioidaceae	Marmoricola
ASV1749	7.4767	-2.84099	2.68141e-06	0.0626826	soil_type	soil_type	stained_soil	3.34219e-05	Proteobacteria	Gammaproteobacteria	Burkholderiales	SC-I-84	NA
ASV1753	6.6014	0.265782	5.91952e-05	6.48611	soil_type	soil_type	stained_soil	0.000316152	Proteobacteria	Alphaproteobacteria	Rhizobiales	Beijerinckiaceae	alphaI cluster
ASV1761	7.10933	0.16409	0.00234327	7.75391	soil_type	soil_type	stained_soil	0.00595198	Proteobacteria	Alphaproteobacteria	Rhodobacterales	Rhodobacteraceae	Amaricoccus
ASV1762	7.23823	-2.60984	1.24343e-05	0.0646142	soil_type	soil_type	stained_soil	9.95311e-05	Actinobacteriota	Actinobacteria	Corynebacteriales	Mycobacteriaceae	Mycobacterium
ASV1764	7.23147	-1.48071	1.24343e-05	0.0646708	soil_type	soil_type	stained_soil	9.95311e-05	Actinobacteriota	Actinobacteria	Corynebacteriales	Mycobacteriaceae	Mycobacterium
ASV1765	5.38577	-0.663772	3.60981e-05	0.100248	soil_type	soil_type	stained_soil	0.000248977	Proteobacteria	Alphaproteobacteria	Rhodobacterales	Rhodobacteraceae	Defluviimonas
ASV1767	7.2728	-1.70808	1.24343e-05	0.0643269	soil_type	soil_type	stained_soil	9.95311e-05	Actinobacteriota	Actinobacteria	Propionibacteriales	Nocardioidaceae	Marmoricola
ASV1772	7.5619	-1.75625	1.24343e-05	0.0620201	soil_type	soil_type	stained_soil	9.95311e-05	Actinobacteriota	Thermoleophilia	Solirubrobacterales	67-14	NA
ASV1773	7.6937	0.113316	0.0221298	2.23563	soil_type	soil_type	stained_soil	0.0419745	Bacteroidota	Bacteroidia	Chitinophagales	Chitinophagaceae	Parasegetibacter
ASV1777	7.69723	0.0933704	0.00713061	5.56114	soil_type	soil_type	stained_soil	0.0158106	Actinobacteriota	Actinobacteria	Pseudonocardiales	Pseudonocardiaceae	Pseudonocardia
ASV1778	8.55923	-0.261314	8.357e-06	0.105719	soil_type	soil_type	stained_soil	8.54303e-05	Actinobacteriota	Actinobacteria	Micromonosporales	Micromonosporaceae	Luedemannella
ASV1780	7.3381	-2.47737	1.24343e-05	0.063791	soil_type	soil_type	stained_soil	9.95311e-05	Actinobacteriota	Actinobacteria	Propionibacteriales	Nocardioidaceae	Nocardioides
ASV1787	8.4361	0.107412	0.00513554	4.25093	soil_type	soil_type	stained_soil	0.0119967	Verrucomicrobiota	Verrucomicrobiae	Pedosphaerales	Pedosphaeraceae	NA
ASV1788	7.60543	-0.137841	0.00316143	0.26561	soil_type	soil_type	stained_soil	0.00781402	Actinobacteriota	Acidimicrobiia	Microtrichales	Ilumatobacteraceae	NA
ASV1789	5.17727	-0.23868	0.000769236	0.196797	soil_type	soil_type	stained_soil	0.00219333	Firmicutes	Bacilli	Bacillales	Planococcaceae	NA
ASV1794	7.35997	0.38881	4.04095e-06	8.01506	soil_type	soil_type	stained_soil	4.6088e-05	Actinobacteriota	Actinobacteria	Micromonosporales	Micromonosporaceae	NA
ASV1797	6.04367	-0.232874	0.000518357	0.173319	soil_type	soil_type	stained_soil	0.00167986	Actinobacteriota	Actinobacteria	Pseudonocardiales	Pseudonocardiaceae	Pseudonocardia
ASV1799	6.2362	-0.433845	9.00766e-06	0.122477	soil_type	soil_type	stained_soil	8.98193e-05	Chloroflexi	Chloroflexia	Chloroflexales	Roseiflexaceae	NA
ASV1809	8.2092	-1.78203	1.24343e-05	0.0574106	soil_type	soil_type	stained_soil	9.95311e-05	Acidobacteriota	Blastocatellia	Pyrinomonadales	Pyrinomonadaceae	RB41
ASV1810	6.4371	0.248808	8.41607e-05	8.11931	soil_type	soil_type	stained_soil	0.000431942	Acidobacteriota	Acidobacteriae	Bryobacterales	Bryobacteraceae	Bryobacter
ASV1811	4.41673	-0.301171	0.000646356	0.141174	soil_type	soil_type	stained_soil	0.00188296	Proteobacteria	Alphaproteobacteria	Rhizobiales	Xanthobacteraceae	NA
ASV1813	7.35623	0.258624	0.00012203	4.96519	soil_type	soil_type	stained_soil	0.000605926	Verrucomicrobiota	Verrucomicrobiae	Pedosphaerales	Pedosphaeraceae	NA
ASV1820	7.35017	-2.55139	1.24343e-05	0.0636929	soil_type	soil_type	stained_soil	9.95311e-05	Acidobacteriota	Blastocatellia	Pyrinomonadales	Pyrinomonadaceae	RB41
ASV1823	7.08423	-0.157317	0.000723917	0.154066	soil_type	soil_type	stained_soil	0.00207428	Actinobacteriota	Thermoleophilia	Solirubrobacterales	Solirubrobacteraceae	Solirubrobacter
ASV1827	6.95403	-0.672402	6.01334e-08	0.0957881	soil_type	soil_type	stained_soil	2.61101e-06	Actinobacteriota	Acidimicrobiia	Microtrichales	Ilumatobacteraceae	NA
ASV1830	8.05393	-0.480854	2.13343e-05	0.0689918	soil_type	soil_type	stained_soil	0.000159096	Acidobacteriota	Vicinamibacteria	Vicinamibacterales	Vicinamibacteraceae	NA
ASV1835	5.7597	0.208976	0.000847542	5.71538	soil_type	soil_type	stained_soil	0.00238927	Chloroflexi	Chloroflexia	Thermomicrobiales	JG30-KF-CM45	NA
ASV1836	6.63437	-0.363313	4.22523e-06	0.112055	soil_type	soil_type	stained_soil	4.7263e-05	Proteobacteria	Alphaproteobacteria	Tistrellales	Geminicoccaceae	Candidatus Alysiosphaera
ASV1839	7.3768	-0.345125	6.33547e-05	0.0707867	soil_type	soil_type	stained_soil	0.000334	Acidobacteriota	Blastocatellia	Pyrinomonadales	Pyrinomonadaceae	RB41
ASV1841	4.7512	0.859447	3.34438e-06	4.07354	soil_type	soil_type	stained_soil	3.99722e-05	Actinobacteriota	Acidimicrobiia	Microtrichales	Ilumatobacteraceae	NA
ASV1842	7.4587	-0.277481	1.42281e-05	0.169276	soil_type	soil_type	stained_soil	0.000111336	Actinobacteriota	Thermoleophilia	Solirubrobacterales	Solirubrobacteraceae	Solirubrobacter
ASV1853	5.89237	0.129128	0.00868602	5.21961	soil_type	soil_type	stained_soil	0.018782	Actinobacteriota	Actinobacteria	Propionibacteriales	Nocardioidaceae	Nocardioides
ASV1860	6.96423	-0.255033	3.13032e-05	0.125072	soil_type	soil_type	stained_soil	0.000222955	Actinobacteriota	Thermoleophilia	Solirubrobacterales	67-14	NA
ASV1863	7.4319	0.128154	0.0201572	2.09095	soil_type	soil_type	stained_soil	0.0387809	Actinobacteriota	Thermoleophilia	Solirubrobacterales	67-14	NA
ASV1871	6.73397	-0.151204	0.00465087	0.318065	soil_type	soil_type	stained_soil	0.0109821	Proteobacteria	Alphaproteobacteria	Tistrellales	Geminicoccaceae	Candidatus Alysiosphaera
ASV1884	7.44927	0.118638	0.00817076	3.40341	soil_type	soil_type	stained_soil	0.0178448	Acidobacteriota	Vicinamibacteria	Vicinamibacterales	Vicinamibacteraceae	NA
ASV1886	6.54073	0.336163	0.000143678	3.07997	soil_type	soil_type	stained_soil	0.00069259	Proteobacteria	Alphaproteobacteria	Acetobacterales	Acetobacteraceae	Craurococcus-Caldovatus
ASV1887	6.74067	0.102377	0.0173977	3.15175	soil_type	soil_type	stained_soil	0.0341496	Chloroflexi	Chloroflexia	Thermomicrobiales	JG30-KF-CM45	NA
ASV1892	6.81197	0.318273	6.82906e-06	7.20872	soil_type	soil_type	stained_soil	7.26629e-05	Gemmatimonadota	Gemmatimonadetes	Gemmatimonadales	Gemmatimonadaceae	Gemmatimonas
ASV1893	5.10783	-0.206698	0.0126086	0.467289	soil_type	soil_type	stained_soil	0.0259458	Chloroflexi	Chloroflexia	Thermomicrobiales	JG30-KF-CM45	NA
ASV1894	6.13193	-2.74593	6.28438e-08	0.0753928	soil_type	soil_type	stained_soil	2.61101e-06	Actinobacteriota	Thermoleophilia	Solirubrobacterales	67-14	NA
ASV1896	7.4891	0.0915553	0.013671	4.16987	soil_type	soil_type	stained_soil	0.0278366	Myxococcota	Polyangia	Haliangiales	Haliangiaceae	Haliangium
ASV1897	6.49767	0.160916	0.00552281	2.88661	soil_type	soil_type	stained_soil	0.0128156	Acidobacteriota	Vicinamibacteria	Vicinamibacterales	Vicinamibacteraceae	NA
ASV1901	3.05587	-0.276218	0.00554671	0.242949	soil_type	soil_type	stained_soil	0.0128428	Actinobacteriota	Acidimicrobiia	Microtrichales	Iamiaceae	Iamia
ASV1914	7.16713	0.242265	8.38498e-05	5.03929	soil_type	soil_type	stained_soil	0.000431616	Bacteroidota	Bacteroidia	Chitinophagales	Chitinophagaceae	Parafilimonas
ASV1915	6.1456	-9.64325	0.000570862	0.0752378	soil_type	soil_type	stained_soil	0.00167986	Proteobacteria	Gammaproteobacteria	Burkholderiales	B1-7BS	NA
ASV1919	4.95443	-2.58054	4.96479e-05	0.0916686	soil_type	soil_type	stained_soil	0.000277678	Proteobacteria	Alphaproteobacteria	Rhodobacterales	Rhodobacteraceae	Limibaculum
ASV1921	6.62053	-1.19486	0.000176392	0.0702195	soil_type	soil_type	stained_soil	0.000709227	Actinobacteriota	Actinobacteria	Streptomycetales	Streptomycetaceae	Streptomyces
ASV1924	4.0311	-0.353457	0.000898738	0.152213	soil_type	soil_type	stained_soil	0.00252138	Proteobacteria	Alphaproteobacteria	Rhizobiales	Xanthobacteraceae	Afipia
ASV1927	4.9431	1.24797	0.000570862	10.8862	soil_type	soil_type	stained_soil	0.00167986	Actinobacteriota	Actinobacteria	Pseudonocardiales	Pseudonocardiaceae	Pseudonocardia
ASV1929	6.42727	1.06876	4.96479e-05	13.8545	soil_type	soil_type	stained_soil	0.000277678	Actinobacteriota	Thermoleophilia	Solirubrobacterales	67-14	NA
ASV1930	6.9555	-0.300688	4.05755e-05	0.10373	soil_type	soil_type	stained_soil	0.000271281	Actinobacteriota	Actinobacteria	Micromonosporales	Micromonosporaceae	Luedemannella
ASV1934	7.2813	-0.111638	0.0147165	0.34271	soil_type	soil_type	stained_soil	0.0294498	Proteobacteria	Gammaproteobacteria	Burkholderiales	Nitrosomonadaceae	MND1
ASV1941	5.7924	-0.102627	0.0215939	0.253264	soil_type	soil_type	stained_soil	0.0412226	Proteobacteria	Gammaproteobacteria	Burkholderiales	Comamonadaceae	Piscinibacter
ASV1943	6.58127	-16.2041	4.73557e-07	0.0706088	soil_type	soil_type	stained_soil	1.00775e-05	Proteobacteria	Gammaproteobacteria	Burkholderiales	TRA3-20	NA
ASV1956	6.5899	-0.204633	0.000866506	0.234906	soil_type	soil_type	stained_soil	0.00243487	Actinobacteriota	Thermoleophilia	Solirubrobacterales	67-14	NA
ASV1962	6.44657	0.391492	2.39111e-06	6.59389	soil_type	soil_type	stained_soil	3.34219e-05	Actinobacteriota	Actinobacteria	Pseudonocardiales	Pseudonocardiaceae	Pseudonocardia
ASV1967	5.4288	-0.256415	0.000996714	0.162216	soil_type	soil_type	stained_soil	0.00276953	Proteobacteria	Alphaproteobacteria	Rhodobacterales	Rhodobacteraceae	Amaricoccus
ASV1979	4.8603	-3.42783	4.73557e-07	0.0932784	soil_type	soil_type	stained_soil	1.00775e-05	Chloroflexi	Chloroflexia	Thermomicrobiales	JG30-KF-CM45	NA
ASV1985	5.23143	-2.15237	0.000570862	0.0872382	soil_type	soil_type	stained_soil	0.00167986	Actinobacteriota	Actinobacteria	Propionibacteriales	Nocardioidaceae	Nocardioides
ASV1986	6.5176	0.239987	0.000137719	9.5205	soil_type	soil_type	stained_soil	0.000671285	Proteobacteria	Alphaproteobacteria	Rhodobacterales	Rhodobacteraceae	NA
ASV1995	6.25907	-0.418213	1.14678e-05	0.15543	soil_type	soil_type	stained_soil	9.95311e-05	Proteobacteria	Gammaproteobacteria	Steroidobacterales	Steroidobacteraceae	NA
ASV1997	6.7763	0.201407	0.00061367	4.18339	soil_type	soil_type	stained_soil	0.00179976	Proteobacteria	Alphaproteobacteria	Rhizobiales	Xanthobacteraceae	NA
ASV1998	6.8491	0.107564	0.00755733	4.60197	soil_type	soil_type	stained_soil	0.0166509	Proteobacteria	Alphaproteobacteria	Azospirillales	Azospirillaceae	Skermanella
ASV2003	5.27133	0.164154	0.00710423	3.29632	soil_type	soil_type	stained_soil	0.0157721	Acidobacteriota	Acidobacteriae	Bryobacterales	Bryobacteraceae	Bryobacter
ASV2016	6.2443	1.69272	2.68141e-06	13.4886	soil_type	soil_type	stained_soil	3.34219e-05	Actinobacteriota	Thermoleophilia	Solirubrobacterales	Solirubrobacteraceae	Solirubrobacter
ASV2020	5.20477	0.147253	0.0224992	2.51764	soil_type	soil_type	stained_soil	0.0425786	Actinobacteriota	Acidimicrobiia	Microtrichales	Ilumatobacteraceae	CL500-29 marine group
ASV2024	4.68377	0.500046	3.77519e-06	5.73033	soil_type	soil_type	stained_soil	4.39181e-05	Actinobacteriota	Actinobacteria	Micrococcales	Microbacteriaceae	Agromyces
ASV2027	5.3334	-0.159837	0.00782537	0.283936	soil_type	soil_type	stained_soil	0.0172198	Proteobacteria	Alphaproteobacteria	Rhodobacterales	Rhodobacteraceae	Roseobacter clade CHAB-I-5 lineage
ASV2029	7.14837	-0.170105	0.00207302	0.164263	soil_type	soil_type	stained_soil	0.00535915	Proteobacteria	Gammaproteobacteria	Salinisphaerales	Solimonadaceae	Polycyclovorans
ASV2031	5.09563	-0.27398	0.00151558	0.120205	soil_type	soil_type	stained_soil	0.00403769	Actinobacteriota	Actinobacteria	Propionibacteriales	Nocardioidaceae	Nocardioides
ASV2037	3.64303	-2.5973	0.000176392	0.120685	soil_type	soil_type	stained_soil	0.000709227	Firmicutes	Bacilli	Bacillales	Bacillaceae	Bacillus
ASV2041	5.82117	0.21351	0.000992229	5.29685	soil_type	soil_type	stained_soil	0.00276147	Chloroflexi	Chloroflexia	Thermomicrobiales	JG30-KF-CM45	NA
ASV2043	5.4049	2.07597	4.96479e-05	11.8098	soil_type	soil_type	stained_soil	0.000277678	Actinobacteriota	Acidimicrobiia	Microtrichales	Ilumatobacteraceae	NA
ASV2053	5.20723	-0.210193	0.00273087	0.19884	soil_type	soil_type	stained_soil	0.00684678	Proteobacteria	Alphaproteobacteria	Rhizobiales	Xanthobacteraceae	Bradyrhizobium
ASV2056	5.87383	3.02041	2.68141e-06	12.7477	soil_type	soil_type	stained_soil	3.34219e-05	Bacteroidota	Bacteroidia	Chitinophagales	Chitinophagaceae	Ferruginibacter
ASV2057	6.42447	-1.20655	0.000176392	0.0722077	soil_type	soil_type	stained_soil	0.000709227	Proteobacteria	Alphaproteobacteria	Sphingomonadales	Sphingomonadaceae	Ellin6055
ASV2061	5.40233	-0.25156	0.000804051	0.195618	soil_type	soil_type	stained_soil	0.00228141	Proteobacteria	Gammaproteobacteria	Burkholderiales	Comamonadaceae	NA
ASV2062	4.18423	-0.19401	0.00975214	0.175359	soil_type	soil_type	stained_soil	0.0208292	Actinobacteriota	Actinobacteria	Pseudonocardiales	Pseudonocardiaceae	Lechevalieria
ASV2072	6.24107	-0.183303	0.00432013	0.354027	soil_type	soil_type	stained_soil	0.010341	Actinobacteriota	Thermoleophilia	Solirubrobacterales	67-14	NA
ASV2073	6.06893	2.71808	2.68141e-06	13.1379	soil_type	soil_type	stained_soil	3.34219e-05	Proteobacteria	Gammaproteobacteria	Xanthomonadales	Xanthomonadaceae	NA
ASV2083	4.57393	0.189255	0.0224379	2.45613	soil_type	soil_type	stained_soil	0.0425126	Chloroflexi	Chloroflexia	Chloroflexales	Roseiflexaceae	NA
ASV2084	5.47773	0.544513	4.11735e-06	5.49093	soil_type	soil_type	stained_soil	4.63534e-05	Gemmatimonadota	Gemmatimonadetes	Gemmatimonadales	Gemmatimonadaceae	NA
ASV2085	4.35373	0.413542	0.000127042	6.02774	soil_type	soil_type	stained_soil	0.000624473	Acidobacteriota	Blastocatellia	Blastocatellales	Blastocatellaceae	NA
ASV2086	5.25163	-0.197408	0.00130265	0.160604	soil_type	soil_type	stained_soil	0.00352969	Chloroflexi	Chloroflexia	Thermomicrobiales	JG30-KF-CM45	NA
ASV2091	4.9396	-2.87013	1.24343e-05	0.0919185	soil_type	soil_type	stained_soil	9.95311e-05	Proteobacteria	Gammaproteobacteria	Burkholderiales	SC-I-84	NA
ASV2097	5.9466	0.250939	0.000466941	3.64045	soil_type	soil_type	stained_soil	0.00164942	Proteobacteria	Alphaproteobacteria	Azospirillales	Azospirillaceae	NA
ASV2098	4.96803	2.10321	4.96479e-05	10.9361	soil_type	soil_type	stained_soil	0.000277678	Acidobacteriota	Vicinamibacteria	Vicinamibacterales	Vicinamibacteraceae	NA
ASV2099	6.30777	-0.129401	0.014407	0.371037	soil_type	soil_type	stained_soil	0.0289634	Proteobacteria	Gammaproteobacteria	Xanthomonadales	Rhodanobacteraceae	Ahniella
ASV2101	6.36113	-0.313775	0.000177159	0.101394	soil_type	soil_type	stained_soil	0.000710673	Acidobacteriota	Vicinamibacteria	Vicinamibacterales	Vicinamibacteraceae	NA
ASV2102	2.58113	-3.14055	0.000570862	0.162278	soil_type	soil_type	stained_soil	0.00167986	Proteobacteria	Alphaproteobacteria	Rhizobiales	Rhizobiales Incertae Sedis	NA
ASV2103	6.1001	0.149921	0.00469272	4.73375	soil_type	soil_type	stained_soil	0.0110361	Acidobacteriota	Blastocatellia	Pyrinomonadales	Pyrinomonadaceae	RB41
ASV2104	6.2047	0.264462	5.81115e-05	5.97972	soil_type	soil_type	stained_soil	0.000314921	Proteobacteria	Alphaproteobacteria	Rhizobiales	Beijerinckiaceae	Microvirga
ASV2113	4.17127	4.66304	1.24343e-05	9.34253	soil_type	soil_type	stained_soil	9.95311e-05	Actinobacteriota	Actinobacteria	Propionibacteriales	Nocardioidaceae	Nocardioides
ASV2117	5.7744	0.102725	0.0179512	4.00732	soil_type	soil_type	stained_soil	0.0350783	Proteobacteria	Alphaproteobacteria	Azospirillales	Azospirillaceae	Skermanella
ASV2132	4.10873	-0.41222	0.000117776	0.247209	soil_type	soil_type	stained_soil	0.000587196	Actinobacteriota	Thermoleophilia	Solirubrobacterales	Solirubrobacteraceae	Solirubrobacter
ASV2137	5.18753	0.279124	0.00155492	3.66139	soil_type	soil_type	stained_soil	0.00412988	Proteobacteria	Alphaproteobacteria	Rhodobacterales	Rhodobacteraceae	Amaricoccus
ASV2141	5.1107	-4.43167	4.73557e-07	0.0891154	soil_type	soil_type	stained_soil	1.00775e-05	Actinobacteriota	Actinobacteria	Propionibacteriales	Nocardioidaceae	Nocardioides
ASV2144	4.79107	-0.365973	0.000125913	0.141607	soil_type	soil_type	stained_soil	0.000622431	Chloroflexi	Chloroflexia	Thermomicrobiales	JG30-KF-CM45	NA
ASV2151	5.82193	2.77468	2.68141e-06	12.6439	soil_type	soil_type	stained_soil	3.34219e-05	Acidobacteriota	Vicinamibacteria	Vicinamibacterales	Vicinamibacteraceae	NA
ASV2155	3.38743	-0.228532	0.0113087	0.179238	soil_type	soil_type	stained_soil	0.0236331	Actinobacteriota	Actinobacteria	Propionibacteriales	Nocardioidaceae	Nocardioides
ASV2157	6.06113	-5.09023	4.96479e-05	0.0762063	soil_type	soil_type	stained_soil	0.000277678	Acidobacteriota	Vicinamibacteria	Vicinamibacterales	Vicinamibacteraceae	NA
ASV2158	4.78023	-0.309152	0.00555061	0.125807	soil_type	soil_type	stained_soil	0.0128428	Proteobacteria	Gammaproteobacteria	Xanthomonadales	Xanthomonadaceae	Arenimonas
ASV2161	4.2664	5.26089	4.96479e-05	9.5328	soil_type	soil_type	stained_soil	0.000277678	Bdellovibrionota	Bdellovibrionia	Bdellovibrionales	Bdellovibrionaceae	Bdellovibrio
ASV2167	6.6795	-2.04865	4.96479e-05	0.0696427	soil_type	soil_type	stained_soil	0.000277678	Proteobacteria	Gammaproteobacteria	Burkholderiales	Nitrosomonadaceae	MND1
ASV2170	4.23873	-2.92742	4.96479e-05	0.105513	soil_type	soil_type	stained_soil	0.000277678	Gemmatimonadota	Gemmatimonadetes	Gemmatimonadales	Gemmatimonadaceae	Gemmatimonas
ASV2173	4.1007	-3.76097	2.68141e-06	0.108679	soil_type	soil_type	stained_soil	3.34219e-05	Actinobacteriota	Thermoleophilia	Solirubrobacterales	Solirubrobacteraceae	NA
ASV2174	5.26333	-0.246752	0.00374723	0.206568	soil_type	soil_type	stained_soil	0.00906923	Proteobacteria	Alphaproteobacteria	Rhizobiales	Amb-16S-1323	NA
ASV2180	5.30853	-1.48861	0.000176392	0.0860802	soil_type	soil_type	stained_soil	0.000709227	Actinobacteriota	Actinobacteria	Corynebacteriales	Nocardiaceae	NA
ASV2184	3.9589	-0.281634	0.00731201	0.437168	soil_type	soil_type	stained_soil	0.0161922	Chloroflexi	Chloroflexia	Chloroflexales	Roseiflexaceae	NA
ASV2186	4.64657	-3.87338	4.96479e-05	0.0971521	soil_type	soil_type	stained_soil	0.000277678	Proteobacteria	Alphaproteobacteria	Rhodobacterales	Rhodobacteraceae	Limibaculum
ASV2192	4.90343	-1.78771	0.000570862	0.0925338	soil_type	soil_type	stained_soil	0.00167986	Actinobacteriota	Rubrobacteria	Rubrobacterales	Rubrobacteriaceae	Rubrobacter
ASV2193	4.197	-0.172661	0.0129426	0.219991	soil_type	soil_type	stained_soil	0.026477	Firmicutes	Bacilli	Paenibacillales	Paenibacillaceae	Paenibacillus
ASV2195	5.2694	0.199912	0.00215733	5.44249	soil_type	soil_type	stained_soil	0.00554423	Gemmatimonadota	Gemmatimonadetes	Gemmatimonadales	Gemmatimonadaceae	Gemmatimonas
ASV2204	5.31877	0.190933	0.00394718	3.47843	soil_type	soil_type	stained_soil	0.00951358	Actinobacteriota	Actinobacteria	Streptomycetales	Streptomycetaceae	NA
ASV2206	5.7168	0.20444	0.00120235	6.04067	soil_type	soil_type	stained_soil	0.00328342	Actinobacteriota	Acidimicrobiia	Microtrichales	Ilumatobacteraceae	NA
ASV2210	4.67253	-3.2495	1.24343e-05	0.0966644	soil_type	soil_type	stained_soil	9.95311e-05	Chloroflexi	Chloroflexia	Thermomicrobiales	AKYG1722	NA
ASV2212	4.966	-0.191843	0.00274635	0.206894	soil_type	soil_type	stained_soil	0.00687572	Proteobacteria	Alphaproteobacteria	Rhizobiales	Rhizobiales Incertae Sedis	Nordella
ASV2213	4.6211	-2.61384	0.000570862	0.0976353	soil_type	soil_type	stained_soil	0.00167986	Actinobacteriota	Actinobacteria	Streptomycetales	Streptomycetaceae	Streptomyces
ASV2215	5.211	0.19471	0.00474775	2.92241	soil_type	soil_type	stained_soil	0.0111355	Actinobacteriota	Acidimicrobiia	Microtrichales	Ilumatobacteraceae	NA
ASV2217	5.87027	-0.350241	1.27535e-05	0.179276	soil_type	soil_type	stained_soil	0.000101159	Gemmatimonadota	Gemmatimonadetes	Gemmatimonadales	Gemmatimonadaceae	NA
ASV2221	5.48667	-1.62006	4.96479e-05	0.0835189	soil_type	soil_type	stained_soil	0.000277678	Actinobacteriota	Actinobacteria	Micromonosporales	Micromonosporaceae	Krasilnikovia
ASV2227	5.9432	0.186134	0.00225489	3.46882	soil_type	soil_type	stained_soil	0.00576102	Bacteroidota	Bacteroidia	Cytophagales	Hymenobacteraceae	Adhaeribacter
ASV2228	4.5636	-6.60157	4.73557e-07	0.098744	soil_type	soil_type	stained_soil	1.00775e-05	Chloroflexi	Chloroflexia	Thermomicrobiales	JG30-KF-CM45	NA
ASV2235	3.89283	-3.30177	1.24343e-05	0.113822	soil_type	soil_type	stained_soil	9.95311e-05	Actinobacteriota	Actinobacteria	Corynebacteriales	Mycobacteriaceae	Mycobacterium
ASV2240	5.42157	0.147332	0.0212293	2.36437	soil_type	soil_type	stained_soil	0.040646	Proteobacteria	Alphaproteobacteria	Rhizobiales	Xanthobacteraceae	Pseudolabrys
ASV2244	5.29737	-0.513484	1.52533e-05	0.291	soil_type	soil_type	stained_soil	0.000116232	Actinobacteriota	Actinobacteria	Corynebacteriales	Mycobacteriaceae	Mycobacterium
ASV2251	5.77327	-3.93252	0.000570862	0.0797033	soil_type	soil_type	stained_soil	0.00167986	Proteobacteria	Alphaproteobacteria	Rhizobiales	Hyphomicrobiaceae	Pedomicrobium
ASV2252	5.38577	-4.93125	1.24343e-05	0.0849507	soil_type	soil_type	stained_soil	9.95311e-05	Gemmatimonadota	Gemmatimonadetes	Gemmatimonadales	Gemmatimonadaceae	NA
ASV2256	5.09127	-0.310436	0.000684622	0.142455	soil_type	soil_type	stained_soil	0.00197792	Bacteroidota	Bacteroidia	Chitinophagales	Saprospiraceae	NA
ASV2257	5.52207	-3.40987	2.68141e-06	0.083028	soil_type	soil_type	stained_soil	3.34219e-05	Proteobacteria	Alphaproteobacteria	Sphingomonadales	Sphingomonadaceae	Sphingomonas
ASV2262	4.53137	-0.178561	0.0089424	0.284771	soil_type	soil_type	stained_soil	0.0192648	Proteobacteria	Alphaproteobacteria	Sphingomonadales	Sphingomonadaceae	Sphingomonas
ASV2281	5.54767	-4.32132	2.68141e-06	0.0826765	soil_type	soil_type	stained_soil	3.34219e-05	Acidobacteriota	Vicinamibacteria	Vicinamibacterales	Vicinamibacteraceae	NA
ASV2292	4.33863	2.03555	0.000570862	9.67727	soil_type	soil_type	stained_soil	0.00167986	Proteobacteria	Gammaproteobacteria	Burkholderiales	Comamonadaceae	Ideonella
ASV2300	4.54703	0.408236	5.57905e-05	7.31058	soil_type	soil_type	stained_soil	0.000303285	Verrucomicrobiota	Verrucomicrobiae	Pedosphaerales	Pedosphaeraceae	ADurb.Bin063-1
ASV2301	4.95747	0.188215	0.00681062	3.2414	soil_type	soil_type	stained_soil	0.0151976	Acidobacteriota	Blastocatellia	Blastocatellales	Blastocatellaceae	Stenotrophobacter
ASV2306	5.173	-0.238699	0.00272411	0.296894	soil_type	soil_type	stained_soil	0.00683966	Proteobacteria	Gammaproteobacteria	Burkholderiales	Comamonadaceae	Ramlibacter
ASV2313	4.51223	-0.251715	0.00129416	0.228809	soil_type	soil_type	stained_soil	0.00351216	Firmicutes	Bacilli	Erysipelotrichales	Erysipelotrichaceae	Turicibacter
ASV2314	4.8181	-1.60449	0.000176392	0.0940185	soil_type	soil_type	stained_soil	0.000709227	Proteobacteria	Gammaproteobacteria	Burkholderiales	SC-I-84	NA
ASV2315	4.8634	0.240663	0.00435246	5.13134	soil_type	soil_type	stained_soil	0.0103757	Chloroflexi	Anaerolineae	Caldilineales	Caldilineaceae	NA
ASV2332	4.14217	0.319574	0.00080545	4.08019	soil_type	soil_type	stained_soil	0.00228167	Chloroflexi	Chloroflexia	Thermomicrobiales	JG30-KF-CM45	NA
ASV2339	4.1977	-1.35795	0.000570862	0.106435	soil_type	soil_type	stained_soil	0.00167986	Actinobacteriota	Thermoleophilia	Solirubrobacterales	Solirubrobacteraceae	Solirubrobacter
ASV2342	3.39363	-5.78137	0.000176392	0.128415	soil_type	soil_type	stained_soil	0.000709227	Chloroflexi	Chloroflexia	Thermomicrobiales	JG30-KF-CM45	NA
ASV2345	2.48827	0.390068	0.00357723	4.43175	soil_type	soil_type	stained_soil	0.00873045	Proteobacteria	Alphaproteobacteria	Rhizobiales	Hyphomicrobiaceae	Hyphomicrobium
ASV2350	5.01917	-2.56639	0.000570862	0.0905934	soil_type	soil_type	stained_soil	0.00167986	Acidobacteriota	Vicinamibacteria	Vicinamibacterales	Vicinamibacteraceae	NA
ASV2351	4.06667	-0.186858	0.0228261	0.428451	soil_type	soil_type	stained_soil	0.0430134	Proteobacteria	Gammaproteobacteria	Burkholderiales	Sutterellaceae	NA
ASV2357	3.80043	0.532116	0.000194743	5.7189	soil_type	soil_type	stained_soil	0.000774093	Sumerlaeota	Sumerlaeia	Sumerlaeales	Sumerlaeaceae	Sumerlaea
ASV2365	4.6233	-2.98388	0.000176392	0.0975933	soil_type	soil_type	stained_soil	0.000709227	Proteobacteria	Gammaproteobacteria	Burkholderiales	SC-I-84	NA
ASV2367	4.9479	2.82811	2.68141e-06	10.8958	soil_type	soil_type	stained_soil	3.34219e-05	Proteobacteria	Alphaproteobacteria	Rhizobiales	Xanthobacteraceae	Rhodoplanes
ASV2368	4.78657	3.79144	5.21499e-09	10.5731	soil_type	soil_type	stained_soil	5.6876e-07	Proteobacteria	Alphaproteobacteria	Rhizobiales	Beijerinckiaceae	Microvirga
ASV2374	3.58813	-0.276287	0.00471808	0.163025	soil_type	soil_type	stained_soil	0.0110808	Proteobacteria	Gammaproteobacteria	Burkholderiales	Comamonadaceae	NA
ASV2376	4.39627	0.206466	0.00564149	4.66577	soil_type	soil_type	stained_soil	0.0129817	Actinobacteriota	Actinobacteria	Micrococcales	Microbacteriaceae	Agromyces
ASV2382	3.6176	-6.11593	0.000176392	0.12143	soil_type	soil_type	stained_soil	0.000709227	Bacteroidota	Bacteroidia	Chitinophagales	Chitinophagaceae	Terrimonas
ASV2406	4.48003	-0.271928	0.00165411	0.137692	soil_type	soil_type	stained_soil	0.00436221	Acidobacteriota	Vicinamibacteria	Vicinamibacterales	Vicinamibacteraceae	NA
ASV2413	4.433	0.200734	0.002613	4.87246	soil_type	soil_type	stained_soil	0.00658915	Actinobacteriota	Actinobacteria	Pseudonocardiales	Pseudonocardiaceae	Pseudonocardia
ASV2414	4.79473	0.555735	5.06878e-06	5.95118	soil_type	soil_type	stained_soil	5.56291e-05	Verrucomicrobiota	Verrucomicrobiae	Pedosphaerales	Pedosphaeraceae	ADurb.Bin063-1
ASV2415	5.49357	-0.198326	0.012939	0.137367	soil_type	soil_type	stained_soil	0.026477	Proteobacteria	Gammaproteobacteria	Burkholderiales	Methylophilaceae	Methylotenera
ASV2431	4.33847	-0.217399	0.0193084	0.492957	soil_type	soil_type	stained_soil	0.0373953	Acidobacteriota	Blastocatellia	Pyrinomonadales	Pyrinomonadaceae	RB41
ASV2435	4.15883	-2.99274	0.000570862	0.107323	soil_type	soil_type	stained_soil	0.00167986	Proteobacteria	Gammaproteobacteria	Burkholderiales	Comamonadaceae	NA
ASV2437	3.9608	0.491927	0.000145435	3.6753	soil_type	soil_type	stained_soil	0.000699128	Acidobacteriota	Acidobacteriae	Bryobacterales	Bryobacteraceae	Bryobacter
ASV2442	4.96007	-1.98758	1.24343e-05	0.091574	soil_type	soil_type	stained_soil	9.95311e-05	Actinobacteriota	Actinobacteria	Micrococcales	Intrasporangiaceae	NA
ASV2462	3.87233	-0.186751	0.0128555	0.184157	soil_type	soil_type	stained_soil	0.0263607	Actinobacteriota	Thermoleophilia	Gaiellales	Gaiellaceae	Gaiella
ASV2475	4.3469	-0.184539	0.019843	0.288482	soil_type	soil_type	stained_soil	0.0383032	Verrucomicrobiota	Verrucomicrobiae	Chthoniobacterales	Chthoniobacteraceae	Candidatus Udaeobacter
ASV2483	3.63537	-0.222796	0.0253756	0.472807	soil_type	soil_type	stained_soil	0.0471068	Actinobacteriota	Actinobacteria	Corynebacteriales	Nocardiaceae	Nocardia
ASV2486	4.75563	-0.398322	0.000305496	0.137732	soil_type	soil_type	stained_soil	0.00115638	Acidobacteriota	Thermoanaerobaculia	Thermoanaerobaculales	Thermoanaerobaculaceae	Subgroup 10
ASV2496	5.34027	-0.159175	0.00847066	0.201271	soil_type	soil_type	stained_soil	0.0184305	Actinobacteriota	Thermoleophilia	Solirubrobacterales	67-14	NA
ASV2497	4.35017	2.0736	0.000570862	9.70033	soil_type	soil_type	stained_soil	0.00167986	Actinobacteriota	Actinobacteria	Micrococcales	Microbacteriaceae	NA
ASV2498	4.0207	-0.236279	0.00567753	0.160632	soil_type	soil_type	stained_soil	0.0130188	Proteobacteria	Alphaproteobacteria	Rhizobiales	Amb-16S-1323	NA
ASV2505	3.85437	-5.3842	2.68141e-06	0.114827	soil_type	soil_type	stained_soil	3.34219e-05	Proteobacteria	Alphaproteobacteria	Rhizobiales	Rhizobiales Incertae Sedis	Bauldia
ASV2506	4.24513	0.470459	0.000229511	6.63743	soil_type	soil_type	stained_soil	0.000899992	Verrucomicrobiota	Verrucomicrobiae	Chthoniobacterales	Chthoniobacteraceae	Candidatus Udaeobacter
ASV2512	3.6941	2.19746	0.000570862	8.3882	soil_type	soil_type	stained_soil	0.00167986	Actinobacteriota	Actinobacteria	Pseudonocardiales	Pseudonocardiaceae	Actinomycetospora
ASV2515	4.4001	-0.298624	0.000656723	0.166463	soil_type	soil_type	stained_soil	0.00190455	Gemmatimonadota	Gemmatimonadetes	Gemmatimonadales	Gemmatimonadaceae	NA
ASV2518	5.2563	-3.31792	1.24343e-05	0.0868614	soil_type	soil_type	stained_soil	9.95311e-05	Proteobacteria	Gammaproteobacteria	Burkholderiales	Nitrosomonadaceae	MND1
ASV2522	4.2902	0.307442	0.00582816	2.07468	soil_type	soil_type	stained_soil	0.0133435	Actinobacteriota	Thermoleophilia	Gaiellales	Gaiellaceae	Gaiella
ASV2524	3.38367	3.04233	0.000570862	7.76733	soil_type	soil_type	stained_soil	0.00167986	Proteobacteria	Alphaproteobacteria	Sphingomonadales	Sphingomonadaceae	Sphingomonas
ASV2527	3.46907	-0.722611	1.45338e-05	0.155245	soil_type	soil_type	stained_soil	0.000112717	Chloroflexi	Chloroflexia	Thermomicrobiales	JG30-KF-CM45	NA
ASV2532	4.26933	0.146318	0.0137201	4.86481	soil_type	soil_type	stained_soil	0.0278482	Actinobacteriota	Thermoleophilia	Solirubrobacterales	Solirubrobacteraceae	Solirubrobacter
ASV2535	3.6204	-0.352788	0.00502985	0.151674	soil_type	soil_type	stained_soil	0.0117813	Proteobacteria	Alphaproteobacteria	Reyranellales	Reyranellaceae	NA
ASV2550	4.20597	0.352267	0.000415061	5.47884	soil_type	soil_type	stained_soil	0.00149029	Methylomirabilota	Methylomirabilia	Rokubacteriales	WX65	NA
ASV2557	4.7181	-0.139484	0.0152613	0.271772	soil_type	soil_type	stained_soil	0.0302968	Actinobacteriota	Acidimicrobiia	Microtrichales	Iamiaceae	Iamia
ASV2562	2.1656	12.1135	4.96479e-05	5.3312	soil_type	soil_type	stained_soil	0.000277678	Acidobacteriota	Blastocatellia	Pyrinomonadales	Pyrinomonadaceae	RB41
ASV2574	2.68273	0.616636	0.000356305	2.6117	soil_type	soil_type	stained_soil	0.00131991	Proteobacteria	Alphaproteobacteria	Azospirillales	Inquilinaceae	Inquilinus
ASV2585	4.0227	0.175745	0.00995001	4.43112	soil_type	soil_type	stained_soil	0.0212	Actinobacteriota	Actinobacteria	Propionibacteriales	Nocardioidaceae	Aeromicrobium
ASV2586	4.4618	0.228546	0.00428204	3.75284	soil_type	soil_type	stained_soil	0.0102639	Verrucomicrobiota	Verrucomicrobiae	Pedosphaerales	Pedosphaeraceae	NA
ASV2588	3.64127	-4.55594	4.96479e-05	0.120736	soil_type	soil_type	stained_soil	0.000277678	Proteobacteria	Gammaproteobacteria	Burkholderiales	Comamonadaceae	NA
ASV2592	2.41567	-3.17414	0.000570862	0.171487	soil_type	soil_type	stained_soil	0.00167986	Patescibacteria	Saccharimonadia	Saccharimonadales	LWQ8	NA
ASV2603	3.70417	-0.58392	3.2988e-05	0.163735	soil_type	soil_type	stained_soil	0.000231181	Proteobacteria	Alphaproteobacteria	Acetobacterales	Acetobacteraceae	NA
ASV2609	3.95893	-4.90562	0.000176392	0.112134	soil_type	soil_type	stained_soil	0.000709227	Proteobacteria	Gammaproteobacteria	Burkholderiales	Rhodocyclaceae	Thauera
ASV2618	4.52027	-3.43732	4.96479e-05	0.0995963	soil_type	soil_type	stained_soil	0.000277678	Proteobacteria	Alphaproteobacteria	Rhizobiales	Hyphomicrobiaceae	NA
ASV2643	3.2191	-0.16723	0.021634	0.283702	soil_type	soil_type	stained_soil	0.0412226	Actinobacteriota	Actinobacteria	Propionibacteriales	Nocardioidaceae	Nocardioides
ASV2644	4.29393	-3.51194	4.96479e-05	0.104298	soil_type	soil_type	stained_soil	0.000277678	Gemmatimonadota	Gemmatimonadetes	Gemmatimonadales	Gemmatimonadaceae	NA
ASV2648	3.98697	0.32758	0.000414648	5.744	soil_type	soil_type	stained_soil	0.00149029	Gemmatimonadota	Gemmatimonadetes	Gemmatimonadales	Gemmatimonadaceae	NA
ASV2649	4.38887	0.496845	5.46196e-05	3.75992	soil_type	soil_type	stained_soil	0.000300666	Myxococcota	Polyangia	Haliangiales	Haliangiaceae	Haliangium
ASV2657	4.08397	-0.163338	0.0186736	0.308895	soil_type	soil_type	stained_soil	0.0363272	Proteobacteria	Gammaproteobacteria	Burkholderiales	Methylophilaceae	Methylotenera
ASV2664	4.00953	7.28676	2.68141e-06	9.01907	soil_type	soil_type	stained_soil	3.34219e-05	Proteobacteria	Gammaproteobacteria	Xanthomonadales	Xanthomonadaceae	Arenimonas
ASV2666	3.9171	0.376135	0.000382605	5.43909	soil_type	soil_type	stained_soil	0.00139935	Proteobacteria	Alphaproteobacteria	Rhizobiales	Beijerinckiaceae	NA
ASV2678	3.9767	0.211179	0.0123442	2.47762	soil_type	soil_type	stained_soil	0.0254919	Actinobacteriota	Thermoleophilia	Solirubrobacterales	67-14	NA
ASV2679	4.1905	0.343212	0.000219139	4.90949	soil_type	soil_type	stained_soil	0.000863199	Actinobacteriota	Thermoleophilia	Solirubrobacterales	Solirubrobacteraceae	Solirubrobacter
ASV2684	2.38603	-0.224426	0.026316	0.350129	soil_type	soil_type	stained_soil	0.0484404	Proteobacteria	Alphaproteobacteria	Rhizobiales	Rhizobiaceae	NA
ASV2688	4.13553	-0.173299	0.012118	0.29146	soil_type	soil_type	stained_soil	0.0251437	Proteobacteria	Alphaproteobacteria	Rhodobacterales	Rhodobacteraceae	Amaricoccus
ASV2690	4.29187	0.490428	0.000110973	6.42788	soil_type	soil_type	stained_soil	0.000558061	Chloroflexi	Anaerolineae	Caldilineales	Caldilineaceae	NA
ASV2696	4.4253	0.312426	0.000392587	6.34439	soil_type	soil_type	stained_soil	0.0014302	Actinobacteriota	Acidimicrobiia	Microtrichales	Ilumatobacteraceae	NA
ASV2701	3.45123	-0.265239	0.00423388	0.258299	soil_type	soil_type	stained_soil	0.0101625	Proteobacteria	Alphaproteobacteria	Defluviicoccales	Defluviicoccaceae	Defluviicoccus
ASV2705	3.4312	-0.343289	0.000966698	0.205561	soil_type	soil_type	stained_soil	0.00269902	Proteobacteria	Alphaproteobacteria	Rhizobiales	Rhizobiales Incertae Sedis	NA
ASV2711	3.46267	-0.445902	0.000139952	0.241066	soil_type	soil_type	stained_soil	0.000678379	Proteobacteria	Alphaproteobacteria	Reyranellales	Reyranellaceae	NA
ASV2715	3.9915	0.447525	0.00194047	7.22233	soil_type	soil_type	stained_soil	0.00504639	Chloroflexi	Anaerolineae	Caldilineales	Caldilineaceae	NA
ASV2716	4.11853	0.236981	0.00404493	5.92317	soil_type	soil_type	stained_soil	0.00973574	Bacteroidota	Bacteroidia	Cytophagales	Microscillaceae	Hassallia
ASV2718	4.69633	-1.62068	0.000570862	0.0962217	soil_type	soil_type	stained_soil	0.00167986	Acidobacteriota	Vicinamibacteria	Vicinamibacterales	Vicinamibacteraceae	NA
ASV2720	3.44467	-0.233781	0.00832461	0.234492	soil_type	soil_type	stained_soil	0.0181354	Proteobacteria	Alphaproteobacteria	Rhizobiales	KF-JG30-B3	NA
ASV2721	3.56277	0.260818	0.00786768	2.78831	soil_type	soil_type	stained_soil	0.0172693	Actinobacteriota	Actinobacteria	Streptomycetales	Streptomycetaceae	Streptomyces
ASV2722	4.23333	-3.20386	1.24343e-05	0.105634	soil_type	soil_type	stained_soil	9.95311e-05	Bacteroidota	Bacteroidia	Chitinophagales	Chitinophagaceae	NA
ASV2723	3.24177	0.719375	2.44657e-05	5.43342	soil_type	soil_type	stained_soil	0.000179182	Chloroflexi	Chloroflexia	Thermomicrobiales	JG30-KF-CM45	NA
ASV2729	2.28067	-0.43955	0.00248237	0.236075	soil_type	soil_type	stained_soil	0.006287	Bacteroidota	Bacteroidia	Chitinophagales	Saprospiraceae	NA
ASV2734	4.03137	7.42507	4.96479e-05	9.06273	soil_type	soil_type	stained_soil	0.000277678	Myxococcota	Polyangia	Polyangiales	Sandaracinaceae	NA
ASV2735	4.2142	-4.99803	1.24343e-05	0.106063	soil_type	soil_type	stained_soil	9.95311e-05	Proteobacteria	Gammaproteobacteria	Burkholderiales	Rhodocyclaceae	Azovibrio
ASV2744	2.35263	-9.54012	0.000570862	0.175277	soil_type	soil_type	stained_soil	0.00167986	Chloroflexi	Chloroflexia	Thermomicrobiales	AKYG1722	NA
ASV2747	3.9198	-2.15554	0.000176392	0.113127	soil_type	soil_type	stained_soil	0.000709227	Acidobacteriota	Blastocatellia	Blastocatellales	Blastocatellaceae	JGI 0001001-H03
ASV2760	3.98393	-2.53625	4.96479e-05	0.111509	soil_type	soil_type	stained_soil	0.000277678	Proteobacteria	Gammaproteobacteria	Burkholderiales	Nitrosomonadaceae	Ellin6067
ASV2767	3.9652	0.159554	0.0262404	3.79436	soil_type	soil_type	stained_soil	0.0483521	Acidobacteriota	Acidobacteriae	Bryobacterales	Bryobacteraceae	Bryobacter
ASV2770	3.08587	-0.379706	0.00378239	0.318816	soil_type	soil_type	stained_soil	0.00914165	Chloroflexi	Chloroflexia	Chloroflexales	Chloroflexaceae	Candidatus Chloroploca
ASV2772	4.0779	-0.246419	0.00311994	0.166752	soil_type	soil_type	stained_soil	0.00773338	Proteobacteria	Gammaproteobacteria	Xanthomonadales	Rhodanobacteraceae	NA
ASV2777	3.72943	5.16844	4.96479e-05	8.45887	soil_type	soil_type	stained_soil	0.000277678	Myxococcota	Polyangia	Polyangiales	BIrii41	NA
ASV2783	3.35343	-0.443239	0.000213304	0.214889	soil_type	soil_type	stained_soil	0.000844027	Actinobacteriota	Actinobacteria	Pseudonocardiales	Pseudonocardiaceae	Pseudonocardia
ASV2786	3.30183	-3.04877	2.68141e-06	0.131515	soil_type	soil_type	stained_soil	3.34219e-05	Chloroflexi	Chloroflexia	Thermomicrobiales	JG30-KF-CM45	NA
ASV2795	2.15687	-8.20131	4.96479e-05	0.188192	soil_type	soil_type	stained_soil	0.000277678	Chloroflexi	Chloroflexia	Thermomicrobiales	JG30-KF-CM45	NA
ASV2796	3.19257	-16.027	4.96479e-05	0.135407	soil_type	soil_type	stained_soil	0.000277678	Chloroflexi	Chloroflexia	Chloroflexales	Roseiflexaceae	NA
ASV2803	3.9009	-0.249745	0.00336068	0.244357	soil_type	soil_type	stained_soil	0.00827136	Proteobacteria	Alphaproteobacteria	Defluviicoccales	Defluviicoccaceae	Defluviicoccus
ASV2804	4.2106	-11.5085	4.73557e-07	0.106144	soil_type	soil_type	stained_soil	1.00775e-05	Proteobacteria	Alphaproteobacteria	Rhizobiales	Rhodomicrobiaceae	Rhodomicrobium
ASV2812	2.05687	-0.31315	0.0228384	0.354954	soil_type	soil_type	stained_soil	0.0430134	Chloroflexi	Chloroflexia	Chloroflexales	Roseiflexaceae	NA
ASV2815	2.83663	0.22572	0.019963	2.76584	soil_type	soil_type	stained_soil	0.0384497	Verrucomicrobiota	Verrucomicrobiae	Pedosphaerales	Pedosphaeraceae	NA
ASV2821	3.71283	0.357621	0.000648133	3.93456	soil_type	soil_type	stained_soil	0.00188499	Actinobacteriota	Thermoleophilia	Solirubrobacterales	Solirubrobacteraceae	Conexibacter
ASV2827	2.59893	-25.6985	1.24343e-05	0.161346	soil_type	soil_type	stained_soil	9.95311e-05	Actinobacteriota	Actinobacteria	Corynebacteriales	Mycobacteriaceae	Mycobacterium
ASV2832	3.55613	0.152878	0.022993	3.78435	soil_type	soil_type	stained_soil	0.0432358	Proteobacteria	Alphaproteobacteria	Rhizobiales	Xanthobacteraceae	NA
ASV2842	3.73203	0.317507	0.000972345	3.90349	soil_type	soil_type	stained_soil	0.00271045	Acidobacteriota	Thermoanaerobaculia	Thermoanaerobaculales	Thermoanaerobaculaceae	Subgroup 10
ASV2886	3.7238	-0.356093	0.00214789	0.242397	soil_type	soil_type	stained_soil	0.00552812	Proteobacteria	Gammaproteobacteria	Xanthomonadales	Xanthomonadaceae	Arenimonas
ASV2891	4.02697	0.185383	0.00814399	4.77105	soil_type	soil_type	stained_soil	0.017831	Proteobacteria	Gammaproteobacteria	Gammaproteobacteria Incertae Sedis	Unknown Family	Acidibacter
ASV2897	3.86677	-5.82565	4.96479e-05	0.114501	soil_type	soil_type	stained_soil	0.000277678	Proteobacteria	Alphaproteobacteria	Rhizobiales	Rhizobiales Incertae Sedis	Bauldia
ASV2899	3.86163	0.521175	9.74806e-05	3.89311	soil_type	soil_type	stained_soil	0.000497379	Bacteroidota	Bacteroidia	Chitinophagales	Chitinophagaceae	Parafilimonas
ASV2907	2.61263	-0.748283	9.79531e-05	0.202594	soil_type	soil_type	stained_soil	0.000498333	Gemmatimonadota	Gemmatimonadetes	Gemmatimonadales	Gemmatimonadaceae	NA
ASV2912	3.65347	0.176625	0.0213041	3.40225	soil_type	soil_type	stained_soil	0.0407182	Proteobacteria	Alphaproteobacteria	Defluviicoccales	Defluviicoccaceae	Defluviicoccus
ASV2921	2.63353	0.241838	0.0204717	2.60315	soil_type	soil_type	stained_soil	0.0392993	Bacteroidota	Bacteroidia	Chitinophagales	Chitinophagaceae	Terrimonas
ASV2922	3.2056	-3.39608	1.24343e-05	0.134931	soil_type	soil_type	stained_soil	9.95311e-05	Proteobacteria	Gammaproteobacteria	Burkholderiales	Nitrosomonadaceae	mle1-7
ASV2926	3.44793	0.298237	0.00197025	4.26217	soil_type	soil_type	stained_soil	0.0051086	Proteobacteria	Alphaproteobacteria	Rhizobiales	Xanthobacteraceae	NA
ASV2932	2.5035	-0.347292	0.0033887	0.273568	soil_type	soil_type	stained_soil	0.00832856	Acidobacteriota	Acidobacteriae	Solibacterales	Solibacteraceae	Candidatus Solibacter
ASV2935	2.91297	-0.235207	0.0123154	0.306558	soil_type	soil_type	stained_soil	0.0254625	Proteobacteria	Alphaproteobacteria	Tistrellales	Geminicoccaceae	Candidatus Alysiosphaera
ASV2950	3.6115	-0.213669	0.00962437	0.289497	soil_type	soil_type	stained_soil	0.0205815	Acidobacteriota	Vicinamibacteria	Vicinamibacterales	Vicinamibacteraceae	NA
ASV2951	3.96457	0.15293	0.0180687	4.51966	soil_type	soil_type	stained_soil	0.0352682	Proteobacteria	Alphaproteobacteria	Tistrellales	Geminicoccaceae	NA
ASV2952	3.3835	0.341989	0.00118303	4.19495	soil_type	soil_type	stained_soil	0.00324079	Bacteroidota	Bacteroidia	Chitinophagales	Chitinophagaceae	Parafilimonas
ASV2953	2.6046	0.493283	0.00047184	4.46372	soil_type	soil_type	stained_soil	0.00166335	Proteobacteria	Gammaproteobacteria	Burkholderiales	Comamonadaceae	NA
ASV2954	3.38183	0.608136	0.000122227	5.63177	soil_type	soil_type	stained_soil	0.000605926	Proteobacteria	Alphaproteobacteria	Azospirillales	Azospirillaceae	Skermanella
ASV2956	3.7114	0.215545	0.0104217	3.4631	soil_type	soil_type	stained_soil	0.0220703	Actinobacteriota	Thermoleophilia	Solirubrobacterales	67-14	NA
ASV2959	3.87707	0.237254	0.00351648	4.14386	soil_type	soil_type	stained_soil	0.00860038	Actinobacteriota	Thermoleophilia	Solirubrobacterales	67-14	NA
ASV2968	2.38107	0.679446	0.000342266	3.55179	soil_type	soil_type	stained_soil	0.00127618	Actinobacteriota	Actinobacteria	Micrococcales	Microbacteriaceae	Agromyces
ASV2979	3.1516	2.77527	0.000176392	7.3032	soil_type	soil_type	stained_soil	0.000709227	Gemmatimonadota	Gemmatimonadetes	Gemmatimonadales	Gemmatimonadaceae	Gemmatimonas
ASV2982	3.43867	0.304207	0.0013643	5.04805	soil_type	soil_type	stained_soil	0.0036796	Proteobacteria	Alphaproteobacteria	Azospirillales	Azospirillaceae	Skermanella
ASV2993	3.41893	-0.247229	0.00646099	0.23797	soil_type	soil_type	stained_soil	0.0145664	Actinobacteriota	Thermoleophilia	Solirubrobacterales	Solirubrobacteraceae	Solirubrobacter
ASV3000	3.69007	-7.89208	0.000176392	0.11933	soil_type	soil_type	stained_soil	0.000709227	Acidobacteriota	Vicinamibacteria	Vicinamibacterales	Vicinamibacteraceae	NA
ASV3004	3.26453	5.8541	2.68141e-06	7.52907	soil_type	soil_type	stained_soil	3.34219e-05	Verrucomicrobiota	Verrucomicrobiae	Pedosphaerales	Pedosphaeraceae	NA
ASV3006	2.9411	0.296066	0.00809835	4.54356	soil_type	soil_type	stained_soil	0.0177533	Bacteroidota	Bacteroidia	Flavobacteriales	Flavobacteriaceae	Flavobacterium
ASV3008	3.28737	0.25002	0.00566525	4.08363	soil_type	soil_type	stained_soil	0.0130077	Actinobacteriota	Acidimicrobiia	Microtrichales	Ilumatobacteraceae	NA
ASV3014	3.5717	2.20942	4.96479e-05	8.1434	soil_type	soil_type	stained_soil	0.000277678	Actinobacteriota	Actinobacteria	Propionibacteriales	Propionibacteriaceae	Microlunatus
ASV3018	3.1178	-0.275998	0.007836	0.358681	soil_type	soil_type	stained_soil	0.0172214	Proteobacteria	Alphaproteobacteria	Rhizobiales	Xanthobacteraceae	NA
ASV3025	3.02583	0.42672	0.00039344	4.44841	soil_type	soil_type	stained_soil	0.00143032	Proteobacteria	Alphaproteobacteria	Acetobacterales	Acetobacteraceae	NA
ASV3027	3.08187	-4.22315	0.000176392	0.139592	soil_type	soil_type	stained_soil	0.000709227	Verrucomicrobiota	Verrucomicrobiae	Chthoniobacterales	Chthoniobacteraceae	Candidatus Udaeobacter
ASV3029	2.87357	0.690951	8.8472e-05	4.33745	soil_type	soil_type	stained_soil	0.000452738	Acidobacteriota	Vicinamibacteria	Vicinamibacterales	Vicinamibacteraceae	NA
ASV3030	3.4159	-4.12985	0.000176392	0.127685	soil_type	soil_type	stained_soil	0.000709227	Bacteroidota	Bacteroidia	Chitinophagales	Chitinophagaceae	NA
ASV3034	2.91897	-7.61705	0.000176392	0.146243	soil_type	soil_type	stained_soil	0.000709227	Actinobacteriota	Acidimicrobiia	Microtrichales	Ilumatobacteraceae	NA
ASV3036	3.85373	-8.26582	0.000176392	0.114844	soil_type	soil_type	stained_soil	0.000709227	Myxococcota	Polyangia	Polyangiales	Phaselicystidaceae	Phaselicystis
ASV3041	2.82527	-2.48772	0.000176392	0.150364	soil_type	soil_type	stained_soil	0.000709227	Proteobacteria	Alphaproteobacteria	Rhodobacterales	Rhodobacteraceae	Paracoccus
ASV3046	3.37133	6.35957	0.000176392	7.74267	soil_type	soil_type	stained_soil	0.000709227	Acidobacteriota	Vicinamibacteria	Vicinamibacterales	Vicinamibacteraceae	NA
ASV3047	3.2667	4.24168	0.000176392	7.5334	soil_type	soil_type	stained_soil	0.000709227	Proteobacteria	Gammaproteobacteria	Burkholderiales	Comamonadaceae	Ramlibacter
ASV3048	3.28783	2.42037	0.000570862	7.57567	soil_type	soil_type	stained_soil	0.00167986	Actinobacteriota	Thermoleophilia	Solirubrobacterales	67-14	NA
ASV3060	2.17827	-11.7137	4.73557e-07	0.186688	soil_type	soil_type	stained_soil	1.00775e-05	Chloroflexi	Chloroflexia	Chloroflexales	Roseiflexaceae	NA
ASV3066	3.7567	-0.16567	0.025675	0.285954	soil_type	soil_type	stained_soil	0.0475614	Proteobacteria	Gammaproteobacteria	Burkholderiales	TRA3-20	NA
ASV3085	3.43997	3.1494	1.24343e-05	7.87993	soil_type	soil_type	stained_soil	9.95311e-05	Proteobacteria	Gammaproteobacteria	Burkholderiales	SC-I-84	NA
ASV3091	3.08933	-0.182283	0.0248506	0.317737	soil_type	soil_type	stained_soil	0.0463789	Methylomirabilota	Methylomirabilia	Rokubacteriales	WX65	NA
ASV3102	3.03887	-4.99432	4.96479e-05	0.141288	soil_type	soil_type	stained_soil	0.000277678	Proteobacteria	Alphaproteobacteria	Rhizobiales	Xanthobacteraceae	Rhodoplanes
ASV3103	3.39203	2.31286	0.000176392	7.78407	soil_type	soil_type	stained_soil	0.000709227	Proteobacteria	Alphaproteobacteria	Rhizobiales	Rhizobiales Incertae Sedis	Nordella
ASV3107	3.32317	5.96943	1.24343e-05	7.64633	soil_type	soil_type	stained_soil	9.95311e-05	Acidobacteriota	Vicinamibacteria	Vicinamibacterales	Vicinamibacteraceae	NA
ASV3109	2.15733	0.31529	0.0113516	3.61284	soil_type	soil_type	stained_soil	0.0236944	Proteobacteria	Gammaproteobacteria	Xanthomonadales	Xanthomonadaceae	Arenimonas
ASV3110	3.40647	-0.232901	0.00555661	0.219513	soil_type	soil_type	stained_soil	0.0128428	Gemmatimonadota	Gemmatimonadetes	Gemmatimonadales	Gemmatimonadaceae	NA
ASV3112	3.58977	-5.15545	4.96479e-05	0.122256	soil_type	soil_type	stained_soil	0.000277678	Actinobacteriota	Thermoleophilia	Solirubrobacterales	Solirubrobacteraceae	Conexibacter
ASV3114	2.96083	-3.47869	0.000176392	0.144474	soil_type	soil_type	stained_soil	0.000709227	Actinobacteriota	Thermoleophilia	Solirubrobacterales	67-14	NA
ASV3125	2.6334	0.258342	0.0147799	2.80328	soil_type	soil_type	stained_soil	0.0295429	Proteobacteria	Alphaproteobacteria	Azospirillales	Azospirillaceae	NA
ASV3134	3.32797	0.436755	0.000268141	5.6187	soil_type	soil_type	stained_soil	0.00103206	Actinobacteriota	Actinobacteria	Micromonosporales	Micromonosporaceae	Krasilnikovia
ASV3144	3.49547	-2.05024	0.000570862	0.125142	soil_type	soil_type	stained_soil	0.00167986	Proteobacteria	Gammaproteobacteria	Burkholderiales	Nitrosomonadaceae	Ellin6067
ASV3149	2.5813	0.36329	0.015432	2.24295	soil_type	soil_type	stained_soil	0.0305315	Myxococcota	Polyangia	Polyangiales	Sandaracinaceae	NA
ASV3150	3.00117	-0.679497	0.0001269	0.286838	soil_type	soil_type	stained_soil	0.000624473	Proteobacteria	Gammaproteobacteria	Gammaproteobacteria Incertae Sedis	Unknown Family	Acidibacter
ASV3163	2.85713	-7.75475	4.96479e-05	0.148937	soil_type	soil_type	stained_soil	0.000277678	Gemmatimonadota	Gemmatimonadetes	Gemmatimonadales	Gemmatimonadaceae	Gemmatimonas
ASV3177	3.31547	4.40438	1.24343e-05	7.63093	soil_type	soil_type	stained_soil	9.95311e-05	Myxococcota	Polyangia	Polyangiales	BIrii41	NA
ASV3178	3.2518	0.405855	0.000383318	4.56543	soil_type	soil_type	stained_soil	0.00139935	Acidobacteriota	Vicinamibacteria	Vicinamibacterales	Vicinamibacteraceae	NA
ASV3200	3.3722	0.508624	0.000112487	5.5583	soil_type	soil_type	stained_soil	0.00056405	Acidobacteriota	Vicinamibacteria	Vicinamibacterales	Vicinamibacteraceae	NA
ASV3202	2.36407	-2.83404	0.000570862	0.174577	soil_type	soil_type	stained_soil	0.00167986	Proteobacteria	Alphaproteobacteria	Defluviicoccales	Defluviicoccaceae	Defluviicoccus
ASV3208	2.94837	2.49912	4.96479e-05	6.89673	soil_type	soil_type	stained_soil	0.000277678	Proteobacteria	Alphaproteobacteria	Azospirillales	Azospirillaceae	Skermanella
ASV3209	2.90557	-4.2353	0.000176392	0.146818	soil_type	soil_type	stained_soil	0.000709227	Gemmatimonadota	Gemmatimonadetes	Gemmatimonadales	Gemmatimonadaceae	Gemmatimonas
ASV3213	2.49573	-3.56972	0.000570862	0.166904	soil_type	soil_type	stained_soil	0.00167986	Verrucomicrobiota	Verrucomicrobiae	Chthoniobacterales	Chthoniobacteraceae	Candidatus Udaeobacter
ASV3214	2.67347	-3.57517	0.000176392	0.157556	soil_type	soil_type	stained_soil	0.000709227	Chloroflexi	Chloroflexia	Thermomicrobiales	AKYG1722	NA
ASV3215	2.65093	0.250586	0.0225215	3.00571	soil_type	soil_type	stained_soil	0.0425786	Bacteroidota	Bacteroidia	Chitinophagales	Chitinophagaceae	Terrimonas
ASV3217	2.985	-6.02123	0.000176392	0.143472	soil_type	soil_type	stained_soil	0.000709227	Proteobacteria	Alphaproteobacteria	Rhizobiales	Hyphomicrobiaceae	Hyphomicrobium
ASV3219	3.239	0.297632	0.00533664	4.94141	soil_type	soil_type	stained_soil	0.0124332	Bacteroidota	Bacteroidia	Chitinophagales	Chitinophagaceae	Flavisolibacter
ASV3228	2.71983	0.251007	0.0175063	2.5739	soil_type	soil_type	stained_soil	0.0343242	Verrucomicrobiota	Verrucomicrobiae	Pedosphaerales	Pedosphaeraceae	NA
ASV3234	3.39263	-1.73806	0.000570862	0.128448	soil_type	soil_type	stained_soil	0.00167986	Actinobacteriota	Thermoleophilia	Gaiellales	Gaiellaceae	Gaiella
ASV3254	2.99453	-2.91533	0.000176392	0.143081	soil_type	soil_type	stained_soil	0.000709227	Acidobacteriota	Blastocatellia	Pyrinomonadales	Pyrinomonadaceae	RB41
ASV3258	3.0669	-3.26913	0.000176392	0.140178	soil_type	soil_type	stained_soil	0.000709227	Acidobacteriota	Vicinamibacteria	Vicinamibacterales	Vicinamibacteraceae	NA
ASV3261	3.08743	5.8032	4.96479e-05	7.17487	soil_type	soil_type	stained_soil	0.000277678	Myxococcota	Polyangia	Haliangiales	Haliangiaceae	Haliangium
ASV3271	1.29907	-12.3241	0.000570862	0.277922	soil_type	soil_type	stained_soil	0.00167986	Dependentiae	Babeliae	Babeliales	Vermiphilaceae	NA
ASV3275	1.67923	-0.640657	0.00327062	0.279603	soil_type	soil_type	stained_soil	0.00806716	Chloroflexi	Chloroflexia	Thermomicrobiales	JG30-KF-CM45	NA
ASV3277	1.95907	-27.4932	1.24343e-05	0.203329	soil_type	soil_type	stained_soil	9.95311e-05	Gemmatimonadota	Gemmatimonadetes	Gemmatimonadales	Gemmatimonadaceae	Gemmatimonas
ASV3279	3.26603	3.36493	0.000570862	7.53207	soil_type	soil_type	stained_soil	0.00167986	Verrucomicrobiota	Verrucomicrobiae	Chthoniobacterales	Chthoniobacteraceae	Chthoniobacter
ASV3281	3.10587	0.218672	0.0118284	4.35688	soil_type	soil_type	stained_soil	0.0246308	Actinobacteriota	Actinobacteria	Propionibacteriales	Nocardioidaceae	Marmoricola
ASV3291	2.1731	-7.79486	0.000570862	0.187049	soil_type	soil_type	stained_soil	0.00167986	Acidobacteriota	Blastocatellia	Blastocatellales	Blastocatellaceae	NA
ASV3295	2.8462	0.902186	0.000149993	5.45805	soil_type	soil_type	stained_soil	0.000709227	Bacteroidota	Bacteroidia	Sphingobacteriales	AKYH767	NA
ASV3304	1.2059	0.486467	0.0248968	2.31548	soil_type	soil_type	stained_soil	0.0464155	Proteobacteria	Gammaproteobacteria	Xanthomonadales	Xanthomonadaceae	Thermomonas
ASV3307	2.35427	4.30163	0.000570862	5.70853	soil_type	soil_type	stained_soil	0.00167986	Chloroflexi	Chloroflexia	Thermomicrobiales	JG30-KF-CM45	NA
ASV3326	2.9224	3.61473	0.000176392	6.8448	soil_type	soil_type	stained_soil	0.000709227	Proteobacteria	Gammaproteobacteria	Xanthomonadales	Xanthomonadaceae	NA
ASV3327	2.7476	-0.199006	0.0216578	0.291712	soil_type	soil_type	stained_soil	0.0412226	Proteobacteria	Alphaproteobacteria	Rhizobiales	Xanthobacteraceae	NA
ASV3342	2.90263	-0.253527	0.0108266	0.281892	soil_type	soil_type	stained_soil	0.022817	Proteobacteria	Gammaproteobacteria	Burkholderiales	Nitrosomonadaceae	966-1
ASV3354	2.3474	-4.83461	0.000176392	0.175599	soil_type	soil_type	stained_soil	0.000709227	Bdellovibrionota	Bdellovibrionia	Bacteriovoracales	Bacteriovoracaceae	Bacteriovorax
ASV3359	2.97017	0.200239	0.0264395	2.65734	soil_type	soil_type	stained_soil	0.0486164	Proteobacteria	Gammaproteobacteria	Burkholderiales	Burkholderiaceae	Lautropia
ASV3360	2.71903	-3.13589	0.000570862	0.155326	soil_type	soil_type	stained_soil	0.00167986	Actinobacteriota	Actinobacteria	Micrococcales	Intrasporangiaceae	NA
ASV3392	2.40453	-5.2702	2.68141e-06	0.172145	soil_type	soil_type	stained_soil	3.34219e-05	Proteobacteria	Gammaproteobacteria	Burkholderiales	Nitrosomonadaceae	mle1-7
ASV3395	2.60247	2.12409	0.000570862	6.20493	soil_type	soil_type	stained_soil	0.00167986	Actinobacteriota	Thermoleophilia	Gaiellales	Gaiellaceae	Gaiella
ASV3399	2.9555	0.280936	0.00561354	3.40446	soil_type	soil_type	stained_soil	0.0129401	Proteobacteria	Alphaproteobacteria	Rhizobiales	Hyphomicrobiaceae	Pedomicrobium
ASV3413	3.35443	-4.05779	0.000176392	0.129721	soil_type	soil_type	stained_soil	0.000709227	Acidobacteriota	Vicinamibacteria	Vicinamibacterales	Vicinamibacteraceae	NA
ASV3419	2.27393	0.240545	0.0259648	3.38454	soil_type	soil_type	stained_soil	0.0480115	Proteobacteria	Gammaproteobacteria	Burkholderiales	Comamonadaceae	NA
ASV3429	3.0003	0.207188	0.0153696	4.06047	soil_type	soil_type	stained_soil	0.0304773	Actinobacteriota	Thermoleophilia	Solirubrobacterales	67-14	NA
ASV3447	2.94093	6.28234	0.000570862	6.88187	soil_type	soil_type	stained_soil	0.00167986	Acidobacteriota	Acidobacteriae	Bryobacterales	Bryobacteraceae	Bryobacter
ASV3451	3.03187	-9.52789	4.96479e-05	0.141568	soil_type	soil_type	stained_soil	0.000277678	Actinobacteriota	Thermoleophilia	Gaiellales	Gaiellaceae	Gaiella
ASV3462	2.78647	-3.71135	0.000176392	0.152139	soil_type	soil_type	stained_soil	0.000709227	Actinobacteriota	Thermoleophilia	Solirubrobacterales	67-14	NA
ASV3468	2.54737	4.15755	0.000176392	6.09473	soil_type	soil_type	stained_soil	0.000709227	Chloroflexi	Chloroflexia	Thermomicrobiales	JG30-KF-CM45	NA
ASV3479	2.7804	-3.63888	0.000176392	0.15242	soil_type	soil_type	stained_soil	0.000709227	Actinobacteriota	Acidimicrobiia	Microtrichales	Ilumatobacteraceae	Ilumatobacter
ASV3493	2.08007	9.26123	0.000176392	5.16013	soil_type	soil_type	stained_soil	0.000709227	Chloroflexi	Chloroflexia	Thermomicrobiales	JG30-KF-CM45	NA
ASV3499	2.5432	-3.05089	0.000570862	0.164301	soil_type	soil_type	stained_soil	0.00167986	Actinobacteriota	Thermoleophilia	Gaiellales	Gaiellaceae	Gaiella
ASV3500	2.79007	-4.8562	1.24343e-05	0.151973	soil_type	soil_type	stained_soil	9.95311e-05	Actinobacteriota	Actinobacteria	Corynebacteriales	Mycobacteriaceae	Mycobacterium
ASV3512	2.9129	-0.188301	0.025973	0.266803	soil_type	soil_type	stained_soil	0.0480115	Proteobacteria	Gammaproteobacteria	Burkholderiales	Nitrosomonadaceae	Ellin6067
ASV3520	2.39093	5.67623	4.96479e-05	5.78187	soil_type	soil_type	stained_soil	0.000277678	Proteobacteria	Gammaproteobacteria	Burkholderiales	Comamonadaceae	Piscinibacter
ASV3523	2.56763	-3.55914	0.000176392	0.162992	soil_type	soil_type	stained_soil	0.000709227	Actinobacteriota	Thermoleophilia	Solirubrobacterales	Solirubrobacteraceae	Conexibacter
ASV3543	1.93507	3.21938	2.51662e-06	4.59842	soil_type	soil_type	stained_soil	3.34219e-05	Actinobacteriota	Actinobacteria	Propionibacteriales	Nocardioidaceae	Nocardioides
ASV3546	2.33377	1.01374	0.000642989	5.05186	soil_type	soil_type	stained_soil	0.00187942	Chloroflexi	Anaerolineae	Caldilineales	Caldilineaceae	NA
ASV3559	2.7077	4.94516	0.000176392	6.4154	soil_type	soil_type	stained_soil	0.000709227	Actinobacteriota	Actinobacteria	Micrococcales	Microbacteriaceae	NA
ASV3583	1.97747	0.320694	0.0182249	3.01186	soil_type	soil_type	stained_soil	0.0355335	Proteobacteria	Gammaproteobacteria	Burkholderiales	Comamonadaceae	NA
ASV3584	2.0711	-4.70292	0.000176392	0.194469	soil_type	soil_type	stained_soil	0.000709227	Gemmatimonadota	Gemmatimonadetes	Gemmatimonadales	Gemmatimonadaceae	NA
ASV3585	2.4439	-0.4469	0.00228944	0.294991	soil_type	soil_type	stained_soil	0.00583223	Actinobacteriota	Thermoleophilia	Solirubrobacterales	Solirubrobacteraceae	Solirubrobacter
ASV3591	2.57653	3.58293	0.000176392	6.15307	soil_type	soil_type	stained_soil	0.000709227	Bacteroidota	Bacteroidia	Chitinophagales	Chitinophagaceae	NA
ASV3610	2.08063	-19.3148	1.24343e-05	0.193751	soil_type	soil_type	stained_soil	9.95311e-05	Actinobacteriota	Actinobacteria	Frankiales	Geodermatophilaceae	NA
ASV3626	2.7221	-9.44911	0.000570862	0.155178	soil_type	soil_type	stained_soil	0.00167986	Proteobacteria	Gammaproteobacteria	Burkholderiales	Oxalobacteraceae	NA
ASV3627	2.47733	-3.56458	4.96479e-05	0.167936	soil_type	soil_type	stained_soil	0.000277678	Actinobacteriota	Actinobacteria	Streptomycetales	Streptomycetaceae	Streptomyces
ASV3648	2.39777	-2.61209	0.000570862	0.172547	soil_type	soil_type	stained_soil	0.00167986	Firmicutes	Bacilli	Bacillales	Planococcaceae	Solibacillus
ASV3655	1.74503	0.355338	0.0197553	2.99782	soil_type	soil_type	stained_soil	0.0381762	Actinobacteriota	Thermoleophilia	Solirubrobacterales	Solirubrobacteraceae	Solirubrobacter
ASV3658	1.31283	0.59207	0.0137246	2.09078	soil_type	soil_type	stained_soil	0.0278482	Proteobacteria	Alphaproteobacteria	Azospirillales	Azospirillaceae	Skermanella
ASV3666	2.73723	-0.250206	0.0138699	0.301809	soil_type	soil_type	stained_soil	0.0280451	Proteobacteria	Alphaproteobacteria	Rhodobacterales	Rhodobacteraceae	NA
ASV3690	1.82193	-6.20491	0.000570862	0.215338	soil_type	soil_type	stained_soil	0.00167986	Proteobacteria	Alphaproteobacteria	Acetobacterales	Acetobacteraceae	NA
ASV3696	2.82673	-3.01174	0.000570862	0.150298	soil_type	soil_type	stained_soil	0.00167986	Actinobacteriota	Acidimicrobiia	Microtrichales	Ilumatobacteraceae	NA
ASV3708	2.4363	-13.0426	2.68141e-06	0.170282	soil_type	soil_type	stained_soil	3.34219e-05	Acidobacteriota	Vicinamibacteria	Vicinamibacterales	Vicinamibacteraceae	NA
ASV3716	3.02013	-0.359967	0.0088832	0.194288	soil_type	soil_type	stained_soil	0.0191609	Gemmatimonadota	Gemmatimonadetes	Gemmatimonadales	Gemmatimonadaceae	NA
ASV3717	2.9196	0.292598	0.0185719	4.68965	soil_type	soil_type	stained_soil	0.0361696	Acidobacteriota	Vicinamibacteria	Vicinamibacterales	Vicinamibacteraceae	NA
ASV3725	2.39507	-3.56635	0.000176392	0.172708	soil_type	soil_type	stained_soil	0.000709227	Gemmatimonadota	Gemmatimonadetes	Gemmatimonadales	Gemmatimonadaceae	NA
ASV3738	2.4323	-4.84289	0.000176392	0.170515	soil_type	soil_type	stained_soil	0.000709227	Gemmatimonadota	Gemmatimonadetes	Gemmatimonadales	Gemmatimonadaceae	NA
ASV3751	2.14843	0.407821	0.00619257	3.06127	soil_type	soil_type	stained_soil	0.0140338	Actinobacteriota	Actinobacteria	Propionibacteriales	Propionibacteriaceae	NA
ASV3754	1.43583	-24.4613	0.000570862	0.258287	soil_type	soil_type	stained_soil	0.00167986	Proteobacteria	Alphaproteobacteria	Rhodobacterales	Rhodobacteraceae	Limibaculum
ASV3776	2.41427	-0.326843	0.00618246	0.233329	soil_type	soil_type	stained_soil	0.0140291	Actinobacteriota	Actinobacteria	Micromonosporales	Micromonosporaceae	Hamadaea
ASV3777	2.18433	-4.86134	0.000570862	0.186266	soil_type	soil_type	stained_soil	0.00167986	Chloroflexi	Chloroflexia	Chloroflexales	Roseiflexaceae	NA
ASV3779	1.46743	-1.94642	1.25807e-05	0.31524	soil_type	soil_type	stained_soil	0.000100243	Actinobacteriota	Thermoleophilia	Solirubrobacterales	Solirubrobacteraceae	Solirubrobacter
ASV3781	1.9381	-2.89637	0.000570862	0.205078	soil_type	soil_type	stained_soil	0.00167986	Proteobacteria	Alphaproteobacteria	Tistrellales	Geminicoccaceae	Candidatus Alysiosphaera
ASV3825	2.2846	5.64618	2.68141e-06	5.5692	soil_type	soil_type	stained_soil	3.34219e-05	Proteobacteria	Alphaproteobacteria	Acetobacterales	Acetobacteraceae	Craurococcus-Caldovatus
ASV3826	2.20287	4.16344	0.000570862	5.40573	soil_type	soil_type	stained_soil	0.00167986	Bacteroidota	Bacteroidia	Chitinophagales	Chitinophagaceae	Dinghuibacter
ASV3827	2.14103	0.269332	0.0212431	2.96028	soil_type	soil_type	stained_soil	0.040646	Proteobacteria	Gammaproteobacteria	Xanthomonadales	Xanthomonadaceae	NA
ASV3846	2.08327	8.02888	0.000176392	5.16653	soil_type	soil_type	stained_soil	0.000709227	Myxococcota	Polyangia	Polyangiales	BIrii41	NA
ASV3848	1.9338	0.470236	0.00365394	2.71759	soil_type	soil_type	stained_soil	0.00889279	Proteobacteria	Gammaproteobacteria	Burkholderiales	Burkholderiaceae	Limnobacter
ASV3849	2.53093	-6.54186	0.000570862	0.164966	soil_type	soil_type	stained_soil	0.00167986	Methylomirabilota	Methylomirabilia	Rokubacteriales	WX65	NA
ASV3850	2.6215	-4.82129	0.000176392	0.160179	soil_type	soil_type	stained_soil	0.000709227	Gemmatimonadota	Gemmatimonadetes	Gemmatimonadales	Gemmatimonadaceae	NA
ASV3851	2.1985	-12.2506	4.96479e-05	0.185288	soil_type	soil_type	stained_soil	0.000277678	Methylomirabilota	Methylomirabilia	Rokubacteriales	WX65	NA
ASV3853	2.41223	0.272251	0.011881	3.30385	soil_type	soil_type	stained_soil	0.0247108	Actinobacteriota	Acidimicrobiia	Microtrichales	Ilumatobacteraceae	NA
ASV3869	2.28757	0.474316	0.00263826	4.0266	soil_type	soil_type	stained_soil	0.00664325	Chloroflexi	Anaerolineae	Caldilineales	Caldilineaceae	NA
ASV3872	2.51867	0.298406	0.00864376	3.76633	soil_type	soil_type	stained_soil	0.0187138	Proteobacteria	Gammaproteobacteria	Steroidobacterales	Steroidobacteraceae	Steroidobacter
ASV3903	1.4487	-0.358908	0.0272469	0.380457	soil_type	soil_type	stained_soil	0.049943	Acidobacteriota	Vicinamibacteria	Vicinamibacterales	Vicinamibacteraceae	NA
ASV3940	1.8901	0.691889	0.000734636	3.39893	soil_type	soil_type	stained_soil	0.00210154	Actinobacteriota	Thermoleophilia	Solirubrobacterales	67-14	NA
ASV3941	2.24543	-6.06513	4.96479e-05	0.182121	soil_type	soil_type	stained_soil	0.000277678	Latescibacterota	Latescibacteria	Latescibacterales	Latescibacteraceae	NA
ASV3945	1.58913	0.695127	0.00466326	2.16262	soil_type	soil_type	stained_soil	0.0109965	Proteobacteria	Gammaproteobacteria	Xanthomonadales	Xanthomonadaceae	Arenimonas
ASV3949	2.08587	10.503	1.24343e-05	5.17173	soil_type	soil_type	stained_soil	9.95311e-05	Gemmatimonadota	Gemmatimonadetes	Gemmatimonadales	Gemmatimonadaceae	Gemmatimonas
ASV3961	2.2815	-3.03029	0.000570862	0.179759	soil_type	soil_type	stained_soil	0.00167986	Actinobacteriota	Actinobacteria	Pseudonocardiales	Pseudonocardiaceae	Pseudonocardia
ASV3962	2.07543	-3.50891	0.000176392	0.194142	soil_type	soil_type	stained_soil	0.000709227	Proteobacteria	Gammaproteobacteria	Burkholderiales	Comamonadaceae	Ramlibacter
ASV3974	2.23307	-19.623	0.000570862	0.182945	soil_type	soil_type	stained_soil	0.00167986	Actinobacteriota	Thermoleophilia	Solirubrobacterales	67-14	NA
ASV3975	2.09167	-3.29423	0.000570862	0.192926	soil_type	soil_type	stained_soil	0.00167986	Proteobacteria	Alphaproteobacteria	Rhizobiales	Rhizobiales Incertae Sedis	Nordella
ASV3976	2.5529	-0.314555	0.0143163	0.225998	soil_type	soil_type	stained_soil	0.0288143	Myxococcota	Polyangia	Polyangiales	Phaselicystidaceae	Phaselicystis
ASV3991	1.79437	-0.43972	0.0102825	0.41132	soil_type	soil_type	stained_soil	0.0218018	Chloroflexi	Anaerolineae	Caldilineales	Caldilineaceae	NA
ASV4007	2.00023	0.730638	0.000599467	4.2568	soil_type	soil_type	stained_soil	0.00176106	Proteobacteria	Gammaproteobacteria	Burkholderiales	SC-I-84	NA
ASV4022	1.813	-0.387489	0.0138342	0.320265	soil_type	soil_type	stained_soil	0.0280055	Acidobacteriota	Thermoanaerobaculia	Thermoanaerobaculales	Thermoanaerobaculaceae	Subgroup 10
ASV4032	2.18377	-0.526354	0.0019237	0.225374	soil_type	soil_type	stained_soil	0.00501023	Proteobacteria	Alphaproteobacteria	Azospirillales	Azospirillaceae	NA
ASV4033	2.47577	-6.10297	0.000570862	0.168024	soil_type	soil_type	stained_soil	0.00167986	Proteobacteria	Gammaproteobacteria	Burkholderiales	Nitrosomonadaceae	MND1
ASV4048	2.0287	-0.342626	0.0121603	0.272314	soil_type	soil_type	stained_soil	0.0252016	Acidobacteriota	Thermoanaerobaculia	Thermoanaerobaculales	Thermoanaerobaculaceae	Subgroup 10
ASV4056	1.73837	22.6998	4.96479e-05	4.47673	soil_type	soil_type	stained_soil	0.000277678	Bacteroidota	Bacteroidia	Chitinophagales	Chitinophagaceae	Parafilimonas
ASV4068	2.06413	5.09744	4.96479e-05	5.12827	soil_type	soil_type	stained_soil	0.000277678	Acidobacteriota	Acidobacteriae	Bryobacterales	Bryobacteraceae	Bryobacter
ASV4087	1.86623	-6.1664	0.000176392	0.211306	soil_type	soil_type	stained_soil	0.000709227	Actinobacteriota	Actinobacteria	Micrococcales	Micrococcaceae	NA
ASV4090	0.864267	13.721	4.96479e-05	2.72853	soil_type	soil_type	stained_soil	0.000277678	Actinobacteriota	Actinobacteria	Propionibacteriales	Nocardioidaceae	Nocardioides
ASV4093	2.0023	9.434	4.96479e-05	5.0046	soil_type	soil_type	stained_soil	0.000277678	Gemmatimonadota	Gemmatimonadetes	Gemmatimonadales	Gemmatimonadaceae	Roseisolibacter
ASV4096	2.16677	0.413391	0.00253298	3.48953	soil_type	soil_type	stained_soil	0.00640587	Verrucomicrobiota	Verrucomicrobiae	Pedosphaerales	Pedosphaeraceae	NA
ASV4101	1.83307	-7.89243	0.000570862	0.21431	soil_type	soil_type	stained_soil	0.00167986	Proteobacteria	Gammaproteobacteria	Burkholderiales	Rhodocyclaceae	NA
ASV4115	1.72343	4.80383	0.000176392	4.44687	soil_type	soil_type	stained_soil	0.000709227	Myxococcota	Polyangia	Haliangiales	Haliangiaceae	Haliangium
ASV4132	2.2008	-5.98431	0.000176392	0.18513	soil_type	soil_type	stained_soil	0.000709227	Acidobacteriota	Thermoanaerobaculia	Thermoanaerobaculales	Thermoanaerobaculaceae	Subgroup 10
ASV4134	2.16397	0.459061	0.00176826	3.79147	soil_type	soil_type	stained_soil	0.00462611	Actinobacteriota	Thermoleophilia	Solirubrobacterales	67-14	NA
ASV4149	0.5367	29.5283	0.000570862	2.0734	soil_type	soil_type	stained_soil	0.00167986	Actinobacteriota	Actinobacteria	Propionibacteriales	Nocardioidaceae	Nocardioides
ASV4153	1.5984	-4.72334	0.000570862	0.238277	soil_type	soil_type	stained_soil	0.00167986	Actinobacteriota	Actinobacteria	Propionibacteriales	Nocardioidaceae	Nocardioides
ASV4162	1.2769	-0.715535	0.00673475	0.334929	soil_type	soil_type	stained_soil	0.0151273	Bacteroidota	Bacteroidia	Chitinophagales	Chitinophagaceae	NA
ASV4169	1.80037	0.42553	0.00692975	2.92117	soil_type	soil_type	stained_soil	0.015424	Chloroflexi	Chloroflexia	Chloroflexales	Roseiflexaceae	NA
ASV4170	2.07	0.306571	0.0176874	2.77134	soil_type	soil_type	stained_soil	0.0346016	Proteobacteria	Gammaproteobacteria	Nitrosococcales	Nitrosococcaceae	SZB85
ASV4172	2.16927	-4.91805	4.96479e-05	0.187317	soil_type	soil_type	stained_soil	0.000277678	Proteobacteria	Alphaproteobacteria	Tistrellales	Geminicoccaceae	NA
ASV4231	1.932	-0.29037	0.0244799	0.378122	soil_type	soil_type	stained_soil	0.0457361	Actinobacteriota	Thermoleophilia	Solirubrobacterales	Solirubrobacteraceae	Solirubrobacter
ASV4237	2.04597	0.361718	0.0110916	4.05611	soil_type	soil_type	stained_soil	0.023263	Proteobacteria	Gammaproteobacteria	Burkholderiales	Comamonadaceae	Ramlibacter
ASV4247	1.28923	-12.5977	0.000570862	0.279449	soil_type	soil_type	stained_soil	0.00167986	Proteobacteria	Alphaproteobacteria	Rhizobiales	Beijerinckiaceae	Microvirga
ASV4250	1.95057	-0.404572	0.00855597	0.304868	soil_type	soil_type	stained_soil	0.0185699	Chloroflexi	Anaerolineae	Caldilineales	Caldilineaceae	Litorilinea
ASV4281	1.86807	0.446553	0.00647951	3.17274	soil_type	soil_type	stained_soil	0.0145893	Verrucomicrobiota	Verrucomicrobiae	Verrucomicrobiales	Verrucomicrobiaceae	NA
ASV4286	1.92367	4.61241	0.000570862	4.84733	soil_type	soil_type	stained_soil	0.00167986	Acidobacteriota	Vicinamibacteria	Vicinamibacterales	Vicinamibacteraceae	NA
ASV4295	2.0935	-5.89804	0.000570862	0.19279	soil_type	soil_type	stained_soil	0.00167986	Actinobacteriota	Thermoleophilia	Solirubrobacterales	67-14	NA
ASV4296	2.28363	-0.324048	0.0188864	0.27647	soil_type	soil_type	stained_soil	0.0367002	Bacteroidota	Bacteroidia	Cytophagales	Microscillaceae	NA
ASV4303	1.84503	7.50018	0.000570862	4.69007	soil_type	soil_type	stained_soil	0.00167986	Proteobacteria	Gammaproteobacteria	Xanthomonadales	Rhodanobacteraceae	NA
ASV4327	1.77013	0.39532	0.0150963	2.79141	soil_type	soil_type	stained_soil	0.0300035	Bacteroidota	Bacteroidia	Chitinophagales	Chitinophagaceae	NA
ASV4329	1.76693	5.49201	0.000176392	4.53387	soil_type	soil_type	stained_soil	0.000709227	Bacteroidota	Bacteroidia	Chitinophagales	Chitinophagaceae	Aurantisolimonas
ASV4331	1.94897	-0.738435	0.000558992	0.256501	soil_type	soil_type	stained_soil	0.00167986	Bacteroidota	Bacteroidia	Chitinophagales	Chitinophagaceae	NA
ASV4332	1.86277	-1.43564	0.000345566	0.250153	soil_type	soil_type	stained_soil	0.00128574	Actinobacteriota	Thermoleophilia	Solirubrobacterales	67-14	NA
ASV4382	1.68373	-8.07051	0.000570862	0.228966	soil_type	soil_type	stained_soil	0.00167986	Bdellovibrionota	Bdellovibrionia	Bdellovibrionales	Bdellovibrionaceae	Bdellovibrio
ASV4392	1.8682	7.15211	0.000176392	4.7364	soil_type	soil_type	stained_soil	0.000709227	Proteobacteria	Alphaproteobacteria	Tistrellales	Geminicoccaceae	Candidatus Alysiosphaera
ASV4401	1.9837	0.362411	0.00736803	3.19648	soil_type	soil_type	stained_soil	0.0162956	Proteobacteria	Alphaproteobacteria	Tistrellales	Geminicoccaceae	Candidatus Alysiosphaera
ASV4402	1.9095	3.46993	0.000176392	4.819	soil_type	soil_type	stained_soil	0.000709227	Proteobacteria	Alphaproteobacteria	Rhodobacterales	Rhodobacteraceae	NA
ASV4427	1.58613	0.329978	0.0251211	2.64947	soil_type	soil_type	stained_soil	0.0467837	Bacteroidota	Bacteroidia	Cytophagales	Microscillaceae	Ohtaekwangia
ASV4435	1.88847	-4.91126	0.000570862	0.209339	soil_type	soil_type	stained_soil	0.00167986	Proteobacteria	Alphaproteobacteria	Rhizobiales	Rhizobiales Incertae Sedis	Bauldia
ASV4465	1.58863	11.8651	0.000570862	4.17727	soil_type	soil_type	stained_soil	0.00167986	Bacteroidota	Bacteroidia	Flavobacteriales	Flavobacteriaceae	Flavobacterium
ASV4466	1.79683	-5.22134	0.000176392	0.217691	soil_type	soil_type	stained_soil	0.000709227	Proteobacteria	Gammaproteobacteria	Burkholderiales	Comamonadaceae	NA
ASV4488	1.80617	-10.7679	4.96479e-05	0.21681	soil_type	soil_type	stained_soil	0.000277678	Proteobacteria	Alphaproteobacteria	Tistrellales	Geminicoccaceae	NA
ASV4500	1.83293	7.3192	0.000176392	4.66587	soil_type	soil_type	stained_soil	0.000709227	Proteobacteria	Gammaproteobacteria	Steroidobacterales	Steroidobacteraceae	NA
ASV4522	0.801	-1.99452	0.00156145	0.434907	soil_type	soil_type	stained_soil	0.00414092	Acidobacteriota	Blastocatellia	Pyrinomonadales	Pyrinomonadaceae	RB41
ASV4525	1.6386	-6.19224	0.000176392	0.233798	soil_type	soil_type	stained_soil	0.000709227	Proteobacteria	Gammaproteobacteria	Burkholderiales	Nitrosomonadaceae	mle1-7
ASV4557	1.6546	-0.533061	0.0043865	0.358593	soil_type	soil_type	stained_soil	0.0104284	Proteobacteria	Gammaproteobacteria	Burkholderiales	SC-I-84	NA
ASV4563	1.5754	0.441452	0.0134839	2.93491	soil_type	soil_type	stained_soil	0.0275198	Verrucomicrobiota	Verrucomicrobiae	Chthoniobacterales	Chthoniobacteraceae	NA
ASV4575	1.8136	0.344309	0.0253574	3.12834	soil_type	soil_type	stained_soil	0.0471068	Myxococcota	Polyangia	Polyangiales	BIrii41	NA
ASV4598	1.6113	-0.550557	0.0194851	0.354011	soil_type	soil_type	stained_soil	0.0376956	Actinobacteriota	Actinobacteria	Propionibacteriales	Nocardioidaceae	Nocardioides
ASV4606	1.76347	5.74806	0.000570862	4.52693	soil_type	soil_type	stained_soil	0.00167986	Gemmatimonadota	Gemmatimonadetes	Gemmatimonadales	Gemmatimonadaceae	NA
ASV4608	1.92903	-3.57348	0.000570862	0.205843	soil_type	soil_type	stained_soil	0.00167986	Actinobacteriota	Thermoleophilia	Solirubrobacterales	67-14	NA
ASV4610	1.67583	-5.83634	0.000570862	0.229797	soil_type	soil_type	stained_soil	0.00167986	Chloroflexi	Anaerolineae	Caldilineales	Caldilineaceae	NA
ASV4613	1.9522	-6.37615	0.000176392	0.203899	soil_type	soil_type	stained_soil	0.000709227	Proteobacteria	Alphaproteobacteria	Rhizobiales	Xanthobacteraceae	Rhodoplanes
ASV4618	1.8388	5.62854	4.96479e-05	4.6776	soil_type	soil_type	stained_soil	0.000277678	Proteobacteria	Alphaproteobacteria	Tistrellales	Geminicoccaceae	NA
ASV4643	1.7469	0.553483	0.00201157	2.99859	soil_type	soil_type	stained_soil	0.00520801	Entotheonellaeota	Entotheonellia	Entotheonellales	Entotheonellaceae	NA
ASV4649	1.19143	-33.1748	0.000570862	0.295607	soil_type	soil_type	stained_soil	0.00167986	Actinobacteriota	Thermoleophilia	Gaiellales	Gaiellaceae	Gaiella
ASV4683	1.68607	-6.38221	0.000570862	0.228721	soil_type	soil_type	stained_soil	0.00167986	Actinobacteriota	Acidimicrobiia	Microtrichales	Ilumatobacteraceae	NA
ASV4755	1.62287	-1.11916	0.000283528	0.249917	soil_type	soil_type	stained_soil	0.00108262	Actinobacteriota	Actinobacteria	Pseudonocardiales	Pseudonocardiaceae	Pseudonocardia
ASV4771	1.6571	12.0908	4.96479e-05	4.3142	soil_type	soil_type	stained_soil	0.000277678	Proteobacteria	Gammaproteobacteria	Steroidobacterales	Steroidobacteraceae	Steroidobacter
ASV4807	1.42017	23.2319	0.000570862	3.84033	soil_type	soil_type	stained_soil	0.00167986	Gemmatimonadota	Gemmatimonadetes	Gemmatimonadales	Gemmatimonadaceae	Gemmatimonas
ASV4848	1.5918	6.27956	0.000176392	4.1836	soil_type	soil_type	stained_soil	0.000709227	Acidobacteriota	Vicinamibacteria	Vicinamibacterales	Vicinamibacteraceae	Vicinamibacter
ASV4898	1.65233	-6.40881	0.000570862	0.232306	soil_type	soil_type	stained_soil	0.00167986	Proteobacteria	Alphaproteobacteria	Defluviicoccales	Defluviicoccaceae	Defluviicoccus
ASV4921	1.47607	-9.86351	4.96479e-05	0.253028	soil_type	soil_type	stained_soil	0.000277678	Chloroflexi	Chloroflexia	Thermomicrobiales	JG30-KF-CM45	NA
ASV4960	1.40647	-8.15146	0.000176392	0.262265	soil_type	soil_type	stained_soil	0.000709227	Chloroflexi	Anaerolineae	Caldilineales	Caldilineaceae	Litorilinea
ASV5064	1.46373	11.1118	0.000176392	3.92747	soil_type	soil_type	stained_soil	0.000709227	Actinobacteriota	Thermoleophilia	Gaiellales	Gaiellaceae	Gaiella
ASV5067	1.45657	5.6859	0.000570862	3.91313	soil_type	soil_type	stained_soil	0.00167986	Actinobacteriota	Actinobacteria	Pseudonocardiales	Pseudonocardiaceae	Pseudonocardia
ASV5089	1.45823	-5.92018	0.000570862	0.255332	soil_type	soil_type	stained_soil	0.00167986	Gemmatimonadota	Gemmatimonadetes	Gemmatimonadales	Gemmatimonadaceae	NA
ASV5230	1.16307	-8.56576	0.000570862	0.300649	soil_type	soil_type	stained_soil	0.00167986	Proteobacteria	Alphaproteobacteria	Kiloniellales	Kiloniellaceae	Tagaea
ASV5231	0.8946	0.75345	0.026087	1.90197	soil_type	soil_type	stained_soil	0.0481202	Proteobacteria	Gammaproteobacteria	Burkholderiales	Sutterellaceae	NA
ASV5253	1.44237	0.371538	0.0235165	2.56065	soil_type	soil_type	stained_soil	0.0440777	Verrucomicrobiota	Verrucomicrobiae	Pedosphaerales	Pedosphaeraceae	NA
ASV5282	1.3075	-0.605916	0.00709875	0.339053	soil_type	soil_type	stained_soil	0.0157721	Gemmatimonadota	Gemmatimonadetes	Gemmatimonadales	Gemmatimonadaceae	Gemmatimonas
ASV5340	1.16163	0.777714	0.00538665	2.72888	soil_type	soil_type	stained_soil	0.0125329	Chloroflexi	Chloroflexia	Chloroflexales	Roseiflexaceae	NA
ASV5393	1.39677	-17.3272	0.000570862	0.263606	soil_type	soil_type	stained_soil	0.00167986	Verrucomicrobiota	Verrucomicrobiae	Chthoniobacterales	Chthoniobacteraceae	Candidatus Udaeobacter
ASV5438	1.201	-14.6768	0.000176392	0.293945	soil_type	soil_type	stained_soil	0.000709227	Chloroflexi	Anaerolineae	Caldilineales	Caldilineaceae	Litorilinea
ASV5455	1.0515	1.11045	0.000816438	2.40649	soil_type	soil_type	stained_soil	0.00230531	Chloroflexi	Chloroflexia	Thermomicrobiales	JG30-KF-CM45	NA
ASV5479	1.2942	7.87856	0.000570862	3.5884	soil_type	soil_type	stained_soil	0.00167986	Actinobacteriota	Thermoleophilia	Gaiellales	Gaiellaceae	Gaiella
ASV5588	1.1032	-0.531314	0.0162408	0.406948	soil_type	soil_type	stained_soil	0.0320228	Proteobacteria	Gammaproteobacteria	Gammaproteobacteria Incertae Sedis	Unknown Family	Acidibacter
ASV5681	1.16177	0.540325	0.0238295	2.04017	soil_type	soil_type	stained_soil	0.0446164	Myxococcota	Myxococcia	Myxococcales	Anaeromyxobacteraceae	Anaeromyxobacter
ASV5708	1.0755	9.23157	0.000176392	3.151	soil_type	soil_type	stained_soil	0.000709227	Acidobacteriota	Vicinamibacteria	Vicinamibacterales	Vicinamibacteraceae	NA
ASV5741	1.13583	25.0054	0.000570862	3.27167	soil_type	soil_type	stained_soil	0.00167986	Acidobacteriota	Vicinamibacteria	Vicinamibacterales	Vicinamibacteraceae	NA
ASV5754	1.0901	-10.8956	0.000570862	0.314446	soil_type	soil_type	stained_soil	0.00167986	Proteobacteria	Gammaproteobacteria	Burkholderiales	Comamonadaceae	Ramlibacter
ASV5763	0.925967	1.0181	0.00506263	2.33693	soil_type	soil_type	stained_soil	0.0118422	Proteobacteria	Gammaproteobacteria	Burkholderiales	Nitrosomonadaceae	Ellin6067
ASV5799	1.0678	8.56586	0.000570862	3.1356	soil_type	soil_type	stained_soil	0.00167986	Proteobacteria	Gammaproteobacteria	Burkholderiales	SC-I-84	NA
ASV5852	0.8941	21.559	0.000176392	2.7882	soil_type	soil_type	stained_soil	0.000709227	Acidobacteriota	Vicinamibacteria	Vicinamibacterales	Vicinamibacteraceae	NA
ASV5854	1.0247	-7.79646	0.000570862	0.327933	soil_type	soil_type	stained_soil	0.00167986	Gemmatimonadota	Gemmatimonadetes	Gemmatimonadales	Gemmatimonadaceae	Gemmatimonas
ASV5855	1.11343	-24.6135	0.000176392	0.309898	soil_type	soil_type	stained_soil	0.000709227	Proteobacteria	Gammaproteobacteria	Burkholderiales	Comamonadaceae	Ramlibacter
ASV5955	1.03513	7.7949	0.000570862	3.07027	soil_type	soil_type	stained_soil	0.00167986	Bacteroidota	Bacteroidia	Chitinophagales	Chitinophagaceae	Flaviaesturariibacter
ASV6212	0.7017	27.4678	0.000570862	2.4034	soil_type	soil_type	stained_soil	0.00167986	Acidobacteriota	Vicinamibacteria	Vicinamibacterales	Vicinamibacteraceae	NA
ASV6338	1.07453	-25.0534	0.000570862	0.317554	soil_type	soil_type	stained_soil	0.00167986	Proteobacteria	Gammaproteobacteria	Burkholderiales	Nitrosomonadaceae	Ellin6067
ASV6360	0.991467	29.4991	0.000570862	2.98293	soil_type	soil_type	stained_soil	0.00167986	Proteobacteria	Gammaproteobacteria	Burkholderiales	Sutterellaceae	NA
ASV6590	0.826067	25.4266	0.000570862	2.65213	soil_type	soil_type	stained_soil	0.00167986	Chloroflexi	Chloroflexia	Thermomicrobiales	JG30-KF-CM45	NA
ASV6686	0.612267	1.83383	0.00881715	2.07215	soil_type	soil_type	stained_soil	0.019042	Actinobacteriota	Actinobacteria	Propionibacteriales	Nocardioidaceae	Nocardioides
ASV6705	0.868033	-23.9371	0.000570862	0.365488	soil_type	soil_type	stained_soil	0.00167986	Proteobacteria	Gammaproteobacteria	Gammaproteobacteria Incertae Sedis	Unknown Family	Acidibacter
ASV6714	0.9209	0.860334	0.0144475	2.42977	soil_type	soil_type	stained_soil	0.028993	Proteobacteria	Gammaproteobacteria	Burkholderiales	Nitrosomonadaceae	Ellin6067
ASV6779	0.754933	1.86366	0.00280492	2.34507	soil_type	soil_type	stained_soil	0.00700226	Proteobacteria	Gammaproteobacteria	Xanthomonadales	Xanthomonadaceae	Arenimonas
ASV6967	0.7793	-9.43867	0.000176392	0.390839	soil_type	soil_type	stained_soil	0.000709227	Proteobacteria	Alphaproteobacteria	Rhizobiales	Hyphomicrobiaceae	Pedomicrobium
ASV6994	0.5146	22.4961	0.000570862	2.0292	soil_type	soil_type	stained_soil	0.00167986	Proteobacteria	Gammaproteobacteria	Xanthomonadales	Xanthomonadaceae	NA
ASV7560	0.613467	0.895026	0.0230721	1.8242	soil_type	soil_type	stained_soil	0.0433378	Actinobacteriota	Actinobacteria	Propionibacteriales	Nocardioidaceae	Nocardioides
ASV8221	0.5916	0.887179	0.0260869	1.7503	soil_type	soil_type	stained_soil	0.0481202	Proteobacteria	Gammaproteobacteria	Burkholderiales	SC-I-84	NA
ASV8374	0.460733	1.70424	0.014296	1.70273	soil_type	soil_type	stained_soil	0.0288066	Proteobacteria	Gammaproteobacteria	Burkholderiales	SC-I-84	NA
ASV8724	0.485467	1.85842	0.00367096	1.68361	soil_type	soil_type	stained_soil	0.00892177	Actinobacteriota	Actinobacteria	Micromonosporales	Micromonosporaceae	NA
ASV9189	0.374267	-29.1437	0.000176392	0.571908	soil_type	soil_type	stained_soil	0.000709227	Actinobacteriota	Actinobacteria	Corynebacteriales	Mycobacteriaceae	Mycobacterium
ASV12446	0.2806	-24.0902	0.000570862	0.640533	soil_type	soil_type	stained_soil	0.00167986	Actinobacteriota	Actinobacteria	Propionibacteriales	Nocardioidaceae	Nocardioides
