# Supplementary material
Source: Research Square preprint supplement (doi:10.21203/rs.3.rs-8037905/v2)
Supplement: Supplementary file 6 [file ebe6e07007552b8446da7609.xlsx]

## Sheet: linear_model_regression_bootstr
	Variable	R	original	bootBias	bootSE	bootMed	pval	Gene	pvalues	pvaluesadj
1	soil_type2	100000	-4.77701e-07	-2.60723e-10	1.91074e-07	-4.77418e-07	p<0.05	ermA	0.01974	0.7665
2	water_type2:spike_level2	100000	-5.87933e-07	-2.93008e-10	2.71198e-07	-5.881e-07	p<0.05	ermA	0.03492	0.82665
3	spike_level2:type_sample2	100000	2.73198e-06	1.86354e-09	1.19247e-06	2.7308e-06	p<0.05	ermB	0.03538	0.82665
4	water_type2:spike_level2:type_sample2	100000	-3.71758e-06	1.06021e-09	1.68303e-06	-3.71803e-06	p<0.05	ermB	0.03674	0.82665
5	spike_level2:type_sample2	100000	0.0372657	-1.53764e-06	0.0145967	0.0372713	p<0.05	intI1	0.02044	0.7665
6	type_sample2	100000	0.0160291	-7.20321e-06	0.00657747	0.0160006	p<0.05	korB	0.0408	0.834545
7	water_type2	100000	9.84765e-07	5.61035e-10	4.3567e-07	9.84287e-07	p<0.05	qnrA	0.0258	0.82665
8	type_sample2	100000	0.000622878	3.54001e-07	0.000222439	0.000622873	p<0.05	repA_N	0.02018	0.7665
9	spike_level2:type_sample2	100000	0.0334412	4.73476e-05	0.0118552	0.033448	p<0.05	sul1	0.01408	0.7665
10	spike_level2:type_sample2	100000	0.00496046	-5.69079e-07	0.00127749	0.00495865	p<0.05	tetA	0.00042	0.0945
11	water_type2:spike_level2:type_sample2	100000	-0.00465686	-1.6791e-06	0.00180777	-0.00465551	p<0.05	tetA	0.01186	0.7665
