# Supplementary material
Source: Research Square preprint supplement (doi:10.21203/rs.3.rs-8037905/v2)
Supplement: Supplementary file 7 [file f98e1d7982924b417a545d36.xlsx]

## Sheet: linear_model_regression_bootstr
	Variable	R	original	bootBias	bootSE	bootMed	pval	type_sample	Gene	pvalues	pvaluesadj
1	spike_level2	100000	2.68294e-06	-1.07023e-09	1.17944e-06	2.68579e-06	p<0.05	stained soil	ermB	0.03874	0.710021
2	water_type2:spike_level2	100000	-3.41751e-06	3.42757e-09	1.66044e-06	-3.42207e-06	p<0.05	stained soil	ermB	0.04904	0.710021
3	spike_level2	100000	0.0394798	1.36577e-05	0.0146259	0.0394827	p<0.05	stained soil	intI1	0.01692	0.646036
4	spike_level2	100000	0.0345331	-8.60447e-06	0.0119049	0.0345449	p<0.05	stained soil	sul1	0.01274	0.646036
5	spike_level2	100000	0.106792	-5.83738e-06	0.0469573	0.106786	p<0.05	stained soil	sul2	0.04706	0.710021
6	spike_level2	100000	0.00500941	-8.91609e-06	0.00116796	0.00500504	p<0.05	stained soil	tetA	0.00022	0.0924
7	water_type2:spike_level2	100000	-0.00470137	8.34791e-06	0.00165157	-0.00469015	p<0.05	stained soil	tetA	0.00656	0.55104
8	soil_type2	100000	-4.77701e-07	2.68378e-10	1.58855e-07	-4.77337e-07	p<0.05	unstained soil	ermA	0.0049	0.5145
9	water_type2:spike_level2	100000	-5.87933e-07	-3.60683e-10	2.24438e-07	-5.87906e-07	p<0.05	unstained soil	ermA	0.01122	0.646036
10	spike_level2	100000	0.0022141	-2.12709e-06	0.00108141	0.00221383	p<0.05	unstained soil	intI1	0.04926	0.710021
11	water_type2	100000	9.84765e-07	-4.08831e-11	4.41809e-07	9.83831e-07	p<0.05	unstained soil	qnrA	0.0278	0.710021
12	spike_level2	100000	0.00104248	-2.6085e-07	0.000337437	0.00104184	p<0.05	unstained soil	sul2	0.00254	0.5145
13	spike_level2	100000	0.0310405	-5.07114e-05	0.0144886	0.0310488	p<0.05	rhizosphere	intI1	0.04588	0.710021
14	spike_level2	100000	0.00236772	-1.63728e-06	0.000741518	0.00236772	p<0.05	rhizosphere	sul2	0.00382	0.5145
15	spike_level2:soil_type2	100000	-0.00236032	3.5758e-07	0.00104775	-0.00235605	p<0.05	rhizosphere	sul2	0.02796	0.710021
16	spike_level2	100000	0.128404	4.26586e-05	0.063812	0.128459	p<0.05	rhizosphere	tetA	0.04944	0.710021
17	spike_level2:soil_type2	100000	1.22493	-0.0012939	0.505458	1.22399	p<0.05	phyllosphere	16S copy number	0.01504	0.646036
18	water_type2:spike_level2:soil_type2	100000	-1.89173	0.00161677	0.714564	-1.89127	p<0.05	phyllosphere	16S copy number	0.00826	0.5782
19	spike_level2	100000	2.40801e-07	1.17439e-10	9.15111e-08	2.41144e-07	p<0.05	phyllosphere	ermA	0.01688	0.646036
20	water_type2:spike_level2	100000	-3.04586e-07	1.44874e-10	1.29585e-07	-3.04524e-07	p<0.05	phyllosphere	ermA	0.02464	0.710021
21	spike_level2:soil_type2	100000	-2.92343e-07	5.21493e-11	1.29904e-07	-2.92254e-07	p<0.05	phyllosphere	ermA	0.0302	0.710021
22	water_type2:spike_level2:soil_type2	100000	4.04097e-07	-5.72388e-10	1.83444e-07	4.04081e-07	p<0.05	phyllosphere	ermA	0.03238	0.710021
23	spike_level2	100000	4.89404e-07	2.13178e-10	1.99479e-07	4.90064e-07	p<0.05	phyllosphere	qnrA	0.02168	0.710021
24	water_type2:spike_level2	100000	-5.91203e-07	-7.94803e-11	2.82373e-07	-5.91817e-07	p<0.05	phyllosphere	qnrA	0.04038	0.710021
25	spike_level2:soil_type2	100000	-5.72249e-07	-6.8024e-10	2.82907e-07	-5.74094e-07	p<0.05	phyllosphere	qnrA	0.04672	0.710021
26	water_type2:spike_level2:soil_type2	100000	8.19111e-07	5.67367e-10	3.99892e-07	8.21652e-07	p<0.05	phyllosphere	qnrA	0.04258	0.710021
